# Supplementary material for: Comparing pharmaceutical company payments in the four UK countries: a cross-sectional and social network analysis
Source: PubMed Central journal article supplement (PMC10069501; doi:10.1136/bmjopen-2022-061591), 2023-03-28
Supplement: bmjopen-2022-061591.draft_revisions.pdf [file bmjopen-2022-061591.draft_revisions.pdf]

# BMJ Open

BMJ Open is committed to open peer review. As part of this commitment we make the peer review history of every article we publish publicly available.

When an article is published we post the peer reviewers' comments and the authors' responses online. We also post the versions of the paper that were used during peer review. These are the versions that the peer review comments apply to.

The versions of the paper that follow are the versions that were submitted during the peer review process. They are not the versions of record or the final published versions. They should not be cited or distributed as the published version of this manuscript.

BMJ Open is an open access journal and the full, final, typeset and author-corrected version of record of the manuscript is available on our site with no access controls, subscription charges or pay-per-view fees (<http://bmjopen.bmj.com>).

If you have any questions on BMJ Open's open peer review process please email [info.bmjopen@bmj.com](mailto:info.bmjopen@bmj.com)

# BMJ Open

## Comparing drug company payments in the four UK countries: a cross-sectional and social network analysis

|                               |                                                                                                                                                   |
|-------------------------------|---------------------------------------------------------------------------------------------------------------------------------------------------|
| Journal:                      | <i>BMJ Open</i>                                                                                                                                   |
| Manuscript ID                 | bmjopen-2022-061591                                                                                                                               |
| Article Type:                 | Original research                                                                                                                                 |
| Date Submitted by the Author: | 31-Jan-2022                                                                                                                                       |
| Complete List of Authors:     | Rickard, Emily; University of Bath, Social and Policy Sciences<br>Ozieranski, Piotr; University of Bath, Department of Social and Policy Sciences |
| Keywords:                     | Health policy < HEALTH SERVICES ADMINISTRATION & MANAGEMENT, MEDICAL ETHICS, PUBLIC HEALTH                                                        |
|                               |                                                                                                                                                   |

SCHOLARONE™  
Manuscripts

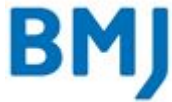

I, the Submitting Author has the right to grant and does grant on behalf of all authors of the Work (as defined in the below author licence), an exclusive licence and/or a non-exclusive licence for contributions from authors who are: i) UK Crown employees; ii) where BMJ has agreed a CC-BY licence shall apply, and/or iii) in accordance with the terms applicable for US Federal Government officers or employees acting as part of their official duties; on a worldwide, perpetual, irrevocable, royalty-free basis to BMJ Publishing Group Ltd ("BMJ") its licensees and where the relevant Journal is co-owned by BMJ to the co-owners of the Journal, to publish the Work in this journal and any other BMJ products and to exploit all rights, as set out in our [licence](#).

The Submitting Author accepts and understands that any supply made under these terms is made by BMJ to the Submitting Author unless you are acting as an employee on behalf of your employer or a postgraduate student of an affiliated institution which is paying any applicable article publishing charge ("APC") for Open Access articles. Where the Submitting Author wishes to make the Work available on an Open Access basis (and intends to pay the relevant APC), the terms of reuse of such Open Access shall be governed by a Creative Commons licence – details of these licences and which [Creative Commons](#) licence will apply to this Work are set out in our licence referred to above.

Other than as permitted in any relevant BMJ Author's Self Archiving Policies, I confirm this Work has not been accepted for publication elsewhere, is not being considered for publication elsewhere and does not duplicate material already published. I confirm all authors consent to publication of this Work and authorise the granting of this licence.

# Comparing drug company payments in the four UK countries: a cross-sectional and social network analysis

Emily Rickard

Department of Social and Policy Sciences, University of Bath, Bath, United Kingdom.

Email: [e.j.rickard@bath.ac.uk](mailto:e.j.rickard@bath.ac.uk)

Piotr Ozieranski (Corresponding Author)

Department of Social and Policy Sciences, University of Bath, Bath, United Kingdom.

Email: [p.ozieranski@bath.ac.uk](mailto:p.ozieranski@bath.ac.uk)

Word count: 4447

## Key words

Transparency, financial disclosures, pharmaceutical industry, health policy, conflicts of interest

## Acknowledgements

We would like to express our gratitude to Dr Emma Carmel for reading and commenting on the manuscript.

## ABSTRACT

**Objectives** To examine general patterns in drug company payments to healthcare and patient organisations in the four UK countries, including payment and recipient prioritisation.

**Design** Cross-sectional descriptive and social network analysis.

**Setting** England, Scotland, Wales, Northern Ireland.

**Participants** 100 donors (drug companies) reporting payments to 4,229 recipients (healthcare organisations and patient organisations) in 2015.

**Main outcome measures** Overlap of payments in Disclosure UK and disclosures of payments to patient organisations. For each country: payment totals and distribution; average number of common recipients between companies; share of payments to different recipient categories and payment types.

**Results** Payments to patient organisations incorrectly reported as payments to healthcare organisations were identified, and some were duplicated in both datasets. Consistent with the population size in each country, England received the most payments (£52.4m), followed by Scotland (£3.65m), Wales (£1.99m) and Northern Ireland (£518,000). Significant differences existed in the distribution of payments across the four countries. Recipients in

1  
2  
3 England and Wales received smaller individual payments (medians of £280 and £300) and  
4 Scotland and Northern Ireland received larger individual payments (£400 and £475.2). Drug  
5 companies prioritised different recipient categories in each country: public sector secondary  
6 and tertiary care providers in England; healthcare commissioning, planning and regulatory  
7 organisations in Scotland and Wales; and public sector primary care providers in Northern  
8 Ireland. The type of payments prioritised also differed by country.  
9  
10

## 11 **Conclusions**

12  
13  
14 Disclosure policies may benefit from being segmented to better apply to the specific context  
15 and issues raised in each UK country. We call for a database containing all industry  
16 payments, including payments to healthcare and patient organisations, in one place, and  
17 disclosed with recipients' full location details. National level data and regulation may  
18 obscure important regional payment variations and recipient vulnerabilities.  
19  
20  
21  
22

## 23 **STRENGTHS AND LIMITATIONS OF THIS STUDY**

- 24 • The first study to comparatively assess pharmaceutical industry payments across the
- 25 UK countries
- 26 • We compiled payments disclosed in the Disclosure UK database and on drug
- 27 company websites to create a database of 20,861 payments made by 100 companies
- 28 • We use social network analysis to facilitate a systematic sub-national comparison of
- 29 payments
- 30 • Our study does not capture the relative share of recipients' income represented by
- 31 industry payments
- 32 • The study draws on one year's worth of payments, however longer-term patterns in
- 33 funding may be what makes a bigger difference in shaping policy and health practice
- 34
- 35
- 36
- 37
- 38
- 39
- 40
- 41
- 42
- 43
- 44
- 45
- 46
- 47
- 48
- 49
- 50
- 51
- 52
- 53
- 54
- 55
- 56
- 57
- 58
- 59
- 60

## INTRODUCTION

The pharmaceutical industry's 'web of influence', whereby companies "sustain large networks to gather, create, control and disseminate information"<sup>1</sup>, and potentially distort public health research and policy to favour commercial interests above patients, has been subjected to increased scrutiny<sup>2 3</sup>. From the perspective of patients, it is integral that this web is understood as it presents opportunities for industry to directly influence those they are funding and indirectly influence governmental organisations which are often unaware that organisations may be, even inadvertently, promoting the interests of powerful industry actors<sup>3</sup>.

In the United States, pharmaceutical industry disclosures of payments to physicians and teaching hospitals were made mandatory in 2013<sup>4</sup>, and subsequent research has examined the risk of individual-level conflicts of interest (COIs) through payments to physicians<sup>5-16</sup>, with institutional COIs through payments to hospitals largely ignored<sup>17</sup>. Further, payments to patient organisations, which provide support and advocate for people with specific conditions<sup>18</sup>, have been seldom explored in the US<sup>19 20</sup> as their disclosure is not regulated by the state or industry. However, the potential consequences of institutional COIs can be as damaging as individual<sup>21-23</sup>, leading to increased prescriptions of drugs with unproven safety<sup>21</sup>, distorting research agendas<sup>24</sup>, and compromising research integrity<sup>25</sup>.

The situation regarding payments to patient organisations in Europe is very different due to the prevalence of industry self-regulation<sup>26 27</sup>. In 2012, the European trade association, European Federation of Pharmaceutical Industries and Associations (EFPIA), mandated drug companies disclose payments to patient organisations annually<sup>28</sup>. Subsequent studies revealed extensive industry-patient organisations ties in the UK<sup>29 30</sup> and the Nordic countries<sup>31 32</sup>. Separately, disclosures of payments to healthcare professionals and healthcare organisations, such as care providers and professional associations, were mandated in 2014 as part of self-regulatory arrangements<sup>33</sup>. Most research attention has been on the poor accessibility and quality of the data<sup>26</sup>, noting lack of standardisation and categorisation of recipients<sup>11 34</sup> and insufficient details about the purpose of individual payments<sup>34</sup>.

Despite healthcare and patient organisations being part of similar self-regulatory disclosure arrangements in Europe, our study is the first to our knowledge to consider them jointly because they are subject to different requirements within self-regulation – healthcare organisations are in a centralised database, Disclosure UK, and patient organisations are on company websites. These organisations have shared interests including providing patient care and support<sup>17 29</sup>, involvement in policy-making<sup>2 35 36</sup>, and conducting clinical research<sup>23 29</sup>. Pharmaceutical companies make payments to both, however solely analysing them separately may underestimate industry's web of influence and potential COIs in particular domains of healthcare and reinforcement effects of payments to organisations with shared goals, interests or personnel<sup>2</sup>.

Another aspect of the industry's web of influence largely unexplored in Europe is targeting payments regionally, which may be characterised by strategic targeting of particular fields of healthcare provision and decision-making and lead to COIs in regional policy-making. Regionally targeted payments can also have direct effects on commissioning, operational

1  
2  
3 funding, and organisational priorities, and bear greater influence on day-to-day practices in  
4 particular healthcare fields. Emerging US research examines payments to physicians  
5 regionally, finding payment distributions differ significantly between states<sup>6 37-39</sup>. There are  
6 also payment disparities between states of different sizes<sup>40</sup> and political leaning<sup>41</sup>, indicating  
7 that demographics and the organisation and regulation of healthcare and lobbying matter.  
8  
9

10 The first regional analysis in Europe revealed differences in the total value and type of  
11 payments prioritised in eight countries<sup>42</sup>. Most recently a UK found headquarter distance  
12 from country capitals to be a significant predictor of patient organisations' dependence on  
13 drug companies funding<sup>43</sup>. The primary reason research has not considered locations of UK  
14 healthcare organisation payment recipients is that Disclosure UK does not report which UK  
15 country they are in<sup>11 14 42</sup>.  
16  
17

18  
19 The UK presents a crucial case for sub-national analysis given its importance for the  
20 pharmaceutical industry as a market<sup>44</sup>, the large value of payments compared to other  
21 European countries<sup>42</sup> and its vast charitable sector comprising many potential recipients<sup>45</sup>.  
22 Moreover, there are four separate health systems in England, Scotland, Wales and Northern  
23 Ireland as power over health was devolved in 1998, giving the four countries increased  
24 autonomy to shape their health policies and services<sup>46-48</sup>. Demographic differences include  
25 population sizes - England's population size is biggest, followed by Scotland, Wales, and  
26 Northern Ireland<sup>49</sup>; in per-person spending on healthcare - highest in Northern Ireland and  
27 lowest in England; health outcomes - highest in England and lowest in Scotland<sup>50</sup>; and  
28 number of prescriptions per capita - highest in Wales and lowest in Scotland<sup>51</sup>. These  
29 distinctions are overlooked in national UK analysis, potentially leading to results reflective of  
30 England only, as the largest country<sup>31</sup> and obscuring country-specific patterns. Further,  
31 pharmaceutical companies often spend more on drug promotion than drug development<sup>52</sup>,  
32 making marketing decisions around *where* to spend money key<sup>53 54</sup>. Studies have begun  
33 acknowledging the country distinction, for example when analysing payments to Clinical  
34 Commissioning Groups<sup>55</sup> and GP surgeries<sup>56</sup> in England. We know from insights at the UK-  
35 level that drug companies prioritise different types of healthcare<sup>11 14</sup> and patient<sup>29</sup>  
36 organisations, and make different types of payments, however the extent that this  
37 translates to the devolved countries of the UK is unclear.  
38  
39  
40  
41  
42

43 Our objective is to examine general patterns in drug company payments to healthcare and  
44 patient organisations in the four UK countries, including payment and recipient  
45 prioritisation.  
46  
47

## 48 **METHODS**

### 49 **Data sources**

50  
51 Our primary data sources are publicly available pharmaceutical industry transparency  
52 disclosures from 2015. Corresponding to relevant Association for the British Pharmaceutical  
53 Industry (ABPI)<sup>57</sup> and EFPIA Codes<sup>28</sup>, drug companies disclose payments to healthcare  
54 organisations and to patient organisations separately and in different ways.  
55  
56

57  
58 Payments to healthcare organisations are disclosed in a single, centralised database of  
59 payments, Disclosure UK, published annually by the ABPI. Payments are disclosed with:  
60

1  
2  
3 recipient name, payment type (donations and grants, costs of events, joint working, and  
4 consultancy – see Supplementary File 1), some address details, and payment value. We use  
5 the 2015 version of Disclosure UK and focus on non-R&D payments to healthcare  
6 organisations. (R&D payments are reported as one lump sum without named recipients<sup>11 33</sup>).  
7 We standardised all recipient names and categorised them based on their primary purpose  
8 (see Supplementary File 2 for a detailed breakdown). As Disclosure UK provides incomplete  
9 addresses, we conducted independent web searches to determine recipient countries. We  
10 detail data preparation, including the approach to data cleaning and coding, elsewhere<sup>11</sup>.  
11  
12  
13

14 Payments to patient organisations are available on drug company websites and are usually  
15 presented as a PDF file and include recipient name, payment description, and payment  
16 value. We extracted the payments to patient organisation data into a single database,  
17 standardising names and identifying headquarter addresses as part of another project<sup>29</sup>.  
18  
19

### 20 **Dataset integration**

21 We merged the Disclosure UK and patient organisation datasets by firstly searching all  
22 charities and third-sector organisations disclosed as recipients in Disclosure UK to identify  
23 and recategorise patient organisations (therefore, we have two distinctive categories –  
24 charities and third-sector organisations; and patient organisations). Secondly, we  
25 standardised names of patient organisations appearing in both datasets to ensure these  
26 were not considered separately. Thirdly, we recoded the patient organisation descriptions  
27 to match payment types used in Disclosure UK (see Supplementary File 1).  
28  
29

### 30 **Analysis**

31 We used a combination of descriptive and social network analysis (SNA). We calculated the  
32 total and median value of payments in each country and recipient category. The Shapiro-  
33 Wilks test of normalcy found the data to be non-parametric in each country, therefore non-  
34 parametric Kruskal-Wallis tests (adjusted for ties) were used to check between-country  
35 differences in the distribution of payments. Dunn's post-hoc pairwise analyses (with  
36 Bonferroni's correction for multiple comparisons) were conducted to identify differences  
37 between countries. Statistical significance was set at  $p = \leq .05$ .  
38  
39  
40

41 SNA was used to calculate connections between drug companies via a shared interest in  
42 recipients, measured by the number of common payment recipients between pairs of drug  
43 companies (density) and all drug companies (degree centrality). See Supplementary File 3  
44 for more detailed description of SNA measures. We examine the number of common  
45 recipients in each country and recipient category and compare the network values. We  
46 created matrices of drug companies with ties based on the number of shared recipients  
47 ('valued matrices') in each country and category. Each network consisted only of the  
48 companies making at least one payment to take into account the 'nested structure' of the  
49 data<sup>58</sup> to ensure network statistics were not negatively skewed by companies making no  
50 payments.  
51  
52  
53  
54

55 Data was processed in Microsoft Excel. We analysed the data descriptively in SPSS version  
56 27 (IBM) and Microsoft Excel. We conducted social network analysis in UCINET version 6<sup>59</sup>.  
57 Country networks were visualised in Gephi version 0.9.2.  
58  
59  
60



## Outcome measures

First, we assessed the level of overlap between the Disclosure UK and patient organisation databases by measuring the number of payments to patient organisations disclosed as healthcare organisations in Disclosure UK and the number of payments reported in both databases.

Second, we explored the payment characteristics in each country. We measured total and median value and the number of: payments, recipients, and companies. We adjusted the total value by population size for comparison. We also compared the distribution of payments between each country using Kruskal-Wallis tests.

Third, we observed the top 10% of companies making payments in each country to compare payment strategies.

Fourth, we assessed the extent to which companies make payments to the same recipients by measuring the average number of common recipients between each pair of companies (degree centrality).

Fifth, we scrutinised which companies dominate the payment networks in each country by identifying the number of recipients that each company had in common with every other company.

Sixth, for each country we examined the most prioritised recipient categories as measured by the proportion of payments received by recipients in each category. to compare the weighted importance of each recipient category. We also compared the distribution of payments in each recipient category using Kruskal-Wallis tests to determine whether payments to similar types of recipients differ between countries.

Seventh, we examined whether companies making payments in *each category* in each country made payments to the same recipients by measuring the average number of recipients each pair of companies share.

Finally, for each country we assessed which types of payments were prioritised through identifying the proportion of different payment types. We also compared the four types of payments using Kruskal-Wallis tests to identify differences in the distribution of payments.

## Patient and public involvement

The study did not involve patients.

## RESULTS

### Duplicate payments

When integrating the Disclosure UK and patient organisation data (see Supplementary File 4 for data integration flowchart), we identified 341 payments (1.71% of all payments in Disclosure UK) to 116 patient organisations (2.88% of all organisations) worth £2,458,931.99 (5.21% of the total) incorrectly disclosed as healthcare organisations in Disclosure UK. We

also found 50 payments duplicated in the patient organisation and Disclosure UK data, which were excluded to ensure no payment was counted twice.

### Payment characteristics in each UK country

The total value and number of payments, the number of recipients, and the number of companies making payments were consistent with the size of each country, with England receiving the highest and Northern Ireland the lowest (this was maintained after adjusting for population size – see Table 1).

Table 1. Value and number of payments, number of companies and recipients, and top donors in integrated dataset

| Descriptive statistic                             | England       | Scotland     | Wales        | Northern Ireland  |
|---------------------------------------------------|---------------|--------------|--------------|-------------------|
| Country population 2015* - n                      | 54.8m         | 5.4m         | 3.1m         | 1.9m              |
| Total value - £                                   | 52,445,615.48 | 3,649,749.43 | 1,987,702.62 | 518,000.40        |
| Total value - £ (adjusted for population size)†   | 957,036.78    | 675,879.52   | 641,194.39   | 272,631.79        |
| Payments - n                                      | 18,190        | 1,370        | 990          | 311               |
| Recipients - n                                    | 3,575         | 282          | 216          | 156               |
| Companies – n                                     | 100           | 72           | 64           | 42                |
| Median payment value (IQR) - £                    | 280 (665.53)  | 400 (685.25) | 300 (658.20) | 475.20 (1,164.35) |
| Value of payments to healthcare organisations - £ | 40,217,772.30 | 3,029,365.10 | 1,887,918.30 | 474,794.80        |
| Value of payments to patient organisations - £    | 12,227,843.18 | 620,384.33   | 99,784.32    | 43,205.6          |

\*Data obtained from the Office for National Statistics, values correct for mid-2015

†Total value of payments divided by the population size

### Between-country differences in payment values

Smaller countries generally received larger individual payments - higher medians were observed in Scotland, Wales and Northern Ireland compared to the largest country England (Table 1). A Kruskal-Wallis Test revealed a statistically significant difference in the distribution of individual payments between the four countries,  $\chi^2(3) = 50.127$ ,  $p < .001$ . Post-hoc Bonferroni pairwise comparisons showed that this difference was significant between Wales-NI ( $p < .000$ ), England-Scotland ( $p < .001$ ), England-NI ( $p < .001$ ), Wales-Scot ( $p = .001$ ), and Scotland-NI ( $p = .004$ ).

### Top donors in each country

Focusing on the top 10% of donors in each country, we can identify different approaches to payments across the four countries (see Supplementary File 5). Top donors generally made larger payments in Wales and multiple smaller payments in Northern Ireland. Pfizer was consistently a top donor with a high volume of payments in all four countries. In England, Novartis was the second biggest donor characterised by large payments; similar patterns characterised Biogen's payments in Scotland and Wales. The top donors in each country

were generally consistent, although England, Scotland and Northern Ireland all had at least one company not featuring as top donors in another country.

### **Within-country connections between companies**

The average value density scores indicate that companies were most strongly connected via a shared interest in recipients in England (on average, companies had between six and seven recipients in common). Companies, on average, had at least one recipient in common with another company in Scotland and Wales, and were least connected in Northern Ireland (Table 2). The average weighted degree density score shows the average number of recipients a company shares with *all* companies in the network, where similarly the highest score was observed in England (664.36 recipients) and lowest in Northern Ireland. The visualised networks are in Supplementary File 6.

Table 2. Drug company connections in each country measured by common recipients

| Network measure                                                                              | England           | Scotland        | Wales           | Northern Ireland |
|----------------------------------------------------------------------------------------------|-------------------|-----------------|-----------------|------------------|
| Density – average value (average number of ties* between two companies)                      | 6.71              | 1.24            | 1.13            | 0.42             |
| Density – average weighted degree† (average number of ties for all companies in the network) | 664.36            | 88.39           | 71.06           | 17.38            |
| Company with highest degree centrality score                                                 | Pfizer<br>(3,394) | Pfizer<br>(319) | Pfizer<br>(206) | Pfizer<br>(63)   |

\*Ties are shared recipients

Note. Calculations were conducted on valued networks which means they consider the number of common recipients. Networks include only companies making payments in each country.

At the company level, the degree centrality scores indicated that Pfizer was the most connected company in each country indicated by expressing a shared interest in recipients with other companies (Table 2). The top ten most connected companies (see Supplementary File 7) were similar in England, Scotland and Wales and featured many of the biggest companies measured by average UK turnover, including AstraZeneca and Pfizer (ranked 1<sup>st</sup> and 2<sup>nd</sup> respectively) as well as lower revenue companies including Astellas (ranked 21<sup>st</sup>). Northern Ireland's top ten most connected companies differed more, and also featured AstraZeneca, as well as smaller companies such as Meda and Lundbeck, suggesting that a cluster of companies had a particular interest in pockets of Northern Ireland's health system. Further, the top ten most connected companies were not always top donors, for example highly connected companies Chiesi in England and Novartis in Wales were not top donors in these countries.

### **Most prioritised recipient categories in each country**

The share of the total value of payments received by recipient categories in each country revealed distinctive patterns (Figure 1). In Wales, healthcare commissioning, planning and regulatory organisations received just under half of all payments - £920,980.22 (46.38% of Wales' total payments, see Supplementary File 8 for values). The top recipient in this category was Cardiff and Vale University Health Board (see Supplementary File 9 for top recipients). The same category was prioritised in Scotland (£878,333.57 – 24.13%); NHS Greater Glasgow and Clyde was the top recipient. Scotland's private companies other than

providers of health services were also prioritised, data analytics firm Quintiles in particular. In England, public sector secondary and tertiary care providers received the most funding (£13,349,779.1 – 25.56%), with Central Manchester University Hospitals Foundation Trust the top recipient, closely followed by patient organisations (23.41%). In Northern Ireland, public sector primary care providers were targeted with the most funding (£184,903.09 – 35.72%); Belfast Health and SC Trust was the top recipient.

Figure 1. Percentage of payments to recipients in each category per country

Education and research providers, namely universities, in England and Scotland, and professional organisations in England, Scotland and Northern Ireland also received large payment shares.

A Kruskal-Wallis Test revealed statistically significant differences in the distribution of payments between countries for ten of the twelve categories of recipients (see Table 3), indicating that payment sizes vary between countries even when the recipient category is the same.

Post-hoc Bonferroni pairwise analyses maintained the significant differences, except for in patient organisations (see Supplementary File 10). Differences in the distribution of payments were frequent in private sector healthcare providers, with Wales, Scotland and England all having significantly higher payment values than Northern Ireland, and Scotland higher than England. In public sector primary care providers, Northern Ireland and Wales both received higher value payments than England and Scotland. In education and research providers, England's, Scotland's, and Northern Ireland's values were significantly higher than Wales.

Table 3. Independent-samples Kruskal-Wallis H Test – differences between countries

| Recipient category                                                     | Recipients – n | Test statistic (H)** | Degrees of freedom | P value |
|------------------------------------------------------------------------|----------------|----------------------|--------------------|---------|
| <i>Alternative providers of health services</i>                        | 189            | 10.818               | 2                  | 0.004*  |
| <i>Charities and other third-sector organisations***</i>               | 387            | 13.015               | 2                  | 0.001*  |
| <i>Education and research providers</i>                                | 1063           | 16.988               | 3                  | 0.001*  |
| <i>Formal bodies representing healthcare professionals</i>             | 489            | 30.142               | 3                  | <.000*  |
| <i>Healthcare commissioning, planning and regulatory organisations</i> | 3312           | 11.919               | 3                  | 0.008*  |
| <i>Patient organisations</i>                                           | 1216           | 11.092               | 3                  | 0.011*  |
| <i>Private companies other than providers of health services</i>       | 1530           | 31.453               | 3                  | <.000*  |
| <i>Private sector healthcare providers</i>                             | 573            | 26.859               | 3                  | <.000*  |
| <i>Professional organisations</i>                                      | 2189           | 15.452               | 3                  | 0.001*  |
| <i>Public administration and providers of public services</i>          | 30             | 2.872                | 2                  | 0.238   |
| <i>Public sector primary care providers</i>                            | 2909           | 60.482               | 3                  | <.000*  |
| <i>Public sector secondary and tertiary care providers</i>             | 6802           | 7.616                | 3                  | 0.055   |

1  
2  
3 \*Statistically significant

4 \*\*All test statistics are adjusted for ties in SPSS

5 \*\*\*excluding providers of health services and professional organisations and not patient  
6 organisations  
7

8  
9 **Extent of connections between companies in each recipient category**

10 Overall, companies targeting common recipients was highest in England's public sector  
11 secondary and tertiary care providers (5.8 common recipients on average – Table 4),  
12 evidencing industry's shared interest in key recipients in this category.  
13  
14

15 In Scotland and Wales, companies had common recipients most frequently in healthcare  
16 commissioning, planning and regulatory organisations. In Northern Ireland, compared to the  
17 country's overall density score, the score for public sector primary care providers category  
18 was very high, suggesting that companies have a particular shared interest in Northern  
19 Ireland's primary care system.  
20  
21

22 Density scores were generally higher in categories receiving a high share of payments,  
23 however there were exceptions characterised by relatively low density scores. Notable cases  
24 include professional organisations and patient organisations, indicating that although these  
25 categories benefitted financially, companies had fewer common interests in particular  
26 recipients.  
27  
28  
29

30 Table 4. Density scores for valued recipient category networks in each country

| Recipient category                                              | England | Scotland | Wales | Northern Ireland |
|-----------------------------------------------------------------|---------|----------|-------|------------------|
| Alternative providers of health services                        | 0.339   | 0.500    | -     | 0.000            |
| Charities and other third-sector organisations                  | 0.510   | 0.333    | 0.476 | -                |
| Education and research providers                                | 1.194   | 0.727    | 0.675 | 1.000            |
| Formal bodies representing healthcare professionals             | 1.293   | 0.000    | 0.400 | 0.000            |
| Healthcare commissioning, planning and regulatory organisations | 2.523   | 1.578    | 1.634 | 0.133            |
| Patient organisations                                           | 0.337   | 0.200    | 0.109 | 0.209            |
| Private companies other than providers of health services       | 0.312   | 0.121    | 0.071 | 0.000            |
| Private sector healthcare providers                             | 0.416   | 0.167    | 0.167 | 0.067            |
| Professional organisations                                      | 0.611   | 0.244    | 0.114 | 0.038            |
| Public administration and providers of public services          | 0.022   | 0.300    | 0.000 | -                |
| Public sector primary care providers                            | 0.893   | 0.038    | 0.124 | 1.600            |
| Public sector secondary and tertiary care providers             | 5.819   | 1.309    | 1.000 | 0.826            |

31  
32  
33  
34  
35  
36  
37  
38  
39  
40  
41  
42  
43  
44  
45  
46  
47  
48  
49  
50  
51  
52  
53  
54  
55  
56 Note. Density scores measure the average tie strength (average number of common recipients  
57 between two companies). The network matrix for each category consisted only of companies making  
58 payments. Dashes indicate no payments were made. Scores of 0.000 indicate all recipients received  
59 payments from one company only.  
60

### Prioritised payment types in each country

The types of payments drug companies made also varied between countries (Figure 2). Donations and grants were consistently prioritised, however there was notable diversity among the remaining payment types. Payments for joint working varied from 19.61% of all payments in Wales, and only 2.29% in Northern Ireland; fees for service and consultancy varied from 33.78% of all payments in Scotland, to 4.86% in Northern Ireland; and contributions to costs of events ranged from 31.87% in Northern Ireland, to 18.58% in Wales.

Figure 2. Percentage of total value for each payment type

A Kruskal-Wallis test also found a statistically significant difference between the distribution of payments for costs of events  $\chi^2(3) = 89.680$ ,  $p = .000$ , which were lowest in Wales and highest in Northern Ireland, and donations and grants  $\chi^2(3) = 31.698$ ,  $p = <.000$ , which were lowest in Northern Ireland and highest in England. Differences in fees for service and consultancy ( $p = .995$ ) and joint working ( $p = .261$ ) were non-significant. Post-hoc analyses revealed the differences in payments for costs of events were significant between every country pairing and between three country pairings for donations and grants (see Supplementary File 11).

### DISCUSSION

Our findings show that the pharmaceutical industry's payment strategies and targeting of certain recipient categories differ across the four UK countries. This confirms concerns that previous analysis of industry payments at the UK level<sup>11</sup> resulted in conclusions representative of England only, an important oversight as key decisions about commissioning of health services are taken within each country<sup>55 56</sup>.

Our analysis also confirms transparency concerns about duplicate payments and payments disclosed on the incorrect platform within the industry's self-regulatory system<sup>30 60</sup>. Although the UK's self-regulatory system is the most robust in Europe<sup>42</sup>, better integration between Disclosure UK and patient organisation disclosures would eliminate double- and under-reporting as well as opacity about where something is reported. We know that drug companies under-report payments to patient organisations<sup>30</sup> and our findings indicate that some instances may be explained by confusion about where to report.

The prioritised recipient categories indicate diverse funding strategies in each country. Scotland and Wales were targeted at the "upstream" policy level (where policies are set), namely healthcare commissioning, planning and regulatory organisations such as NHS Boards (Scotland) and Health Boards (Wales), while England and Northern Ireland were targeted "downstream" (where policies are enacted), namely public sector secondary and tertiary care providers, such as hospitals, in England, and public sector primary care providers, such as GP surgeries, in Northern Ireland. These distinctions reflect the health system setup in each country, as in Scotland and Wales Health Boards are responsible for both the purchase and provision of health services, whereas in England and Northern Ireland these responsibilities are separate<sup>61 62</sup>.

1  
2  
3 Professional organisations were also prioritised in England, Scotland and Northern Ireland,  
4 mirroring observations of frequent individual COIs held by professional organisations in the  
5 UK<sup>11</sup>, Canada and the US<sup>63 64</sup>. These organisations comprise key opinion leaders in specific  
6 health fields which drug companies have been known to seek to influence in order to shape  
7 the background of medical opinion<sup>65-67</sup>, and their members play an important role in the  
8 development of US<sup>63 68</sup> and Japanese<sup>69</sup> clinical practice guidelines. Education and research  
9 providers, particularly universities, were also prioritised in England and Scotland where,  
10 incidentally, all the UK's top universities are located<sup>70</sup>. New pharmaceuticals frequently  
11 originate in universities<sup>71</sup>, and providing payments gives industry the opportunity to exert  
12 greater control over the research process<sup>66</sup>. Both professional organisations<sup>69</sup> and  
13 universities<sup>72</sup> are also central providers of continuing medical education (CME), but industry  
14 financial involvement has been criticised as unregulated and biased promotional activity<sup>73</sup>  
15 <sup>74</sup>. Direct comparison to healthcare organisations also revealed patient organisations as a  
16 relatively major target of payments, particularly in England and Scotland. Funding various  
17 stakeholders forms part of the web of influence<sup>2 3</sup>, allowing companies to influence public  
18 and policy opinion<sup>75 76</sup>. Customarily, industry has targeted prescribers, however non-  
19 prescribing stakeholders have become increasingly important given their considerable  
20 influence over prescribing decisions<sup>77</sup> and involvement in policymaking<sup>3</sup>.

21  
22  
23  
24  
25  
26 The number of recipients in common, whereby higher results imply a significant weighting  
27 of interest and influence, was highest in England and reduced in parallel to population size  
28 in the remaining three countries. These connections are recognised by the pharmaceutical  
29 industry which draws on prescribing and physician data to target their own payments<sup>78 79 80</sup>  
30 and identify organisations to inform marketing strategies<sup>81 82</sup>, suggesting that connections  
31 through common recipients are not accidental. In England, funding healthcare providers  
32 evidently brings benefits given the prevalence of multiple donors per recipient. This pattern  
33 might also in part be a function of the number of research-active and national centres of  
34 excellence located in England, meaning that service providers might be very effective at  
35 getting donor funds, whereas in the smaller countries with perhaps fewer organisations  
36 operating on a national scale, the funding is more targeted and follows fewer overarching  
37 patterns. Additional benefits evidently exist in trying to influence strategic organisations in  
38 Scotland and Wales to shape future policies and service provision. In Northern Ireland, the  
39 smallest UK country, the high number of common primary care providers recipients may  
40 indicate they were being used as an experiment for the privatisation of primary care or for  
41 the establishment of additional primary care services. In the smaller countries, these  
42 patterns of common recipients potentially pose a greater risk to exposing vulnerabilities to  
43 collusion given the much smaller population each recipient serves.

44  
45  
46  
47  
48  
49 Although professional and patient organisations were generally prioritised financially,  
50 recipients in common was infrequent. This may reflect these organisations being more  
51 tightly related to companies with specific drug or disease portfolios<sup>83</sup> than categories with  
52 higher density scores such as primary care providers which appeal to a broader spectrum of  
53 companies. The relatively low density scores for patient organisation are also concerning  
54 given that the ABPI Code provisions prohibit companies from being the sole funder of a  
55 patient organisation<sup>57</sup>.

1  
2  
3 Our findings indicated that different payment types were prioritised in each country,  
4 although donations and grants, such as medical and educational goods, were prioritised in  
5 every consistently, mirroring payments in Ireland<sup>14</sup> and the UK<sup>11</sup>. Payments for joint  
6 working, initiatives involving shared investment by the NHS and drug companies<sup>84</sup>, were  
7 prioritised most in Wales, raising concerns around the extent of drug company involvement  
8 in Welsh health services. Compared to England, there is very little private sector  
9 involvement in healthcare provision in Wales<sup>85</sup>, however our analysis suggests this does not  
10 mean that industry is not heavily involved in healthcare planning and delivery. Joint working  
11 casts a veil over NHS underfunding<sup>86</sup> which may explain the prevalence in Wales given it's  
12 NHS is the most underfunded in the UK<sup>87</sup>. The prioritisation of fees for service and  
13 consultancy in Scotland may reflect the Scottish NHS priorities which include increasing the  
14 role of professionals in resource allocation<sup>88</sup>. Finally, costs of events, such as science or  
15 medical focused conferences and educational events<sup>89</sup>, were prioritised most in Northern  
16 Ireland, however we know industry-sponsored CME can be biased<sup>73</sup>, therefore greater  
17 policy attention needs to be placed on monitoring these activities in Northern Ireland.  
18  
19  
20  
21  
22

### 23 **Strengths and limitations**

24  
25 This is the first study to jointly analyse payments to healthcare and patient organisations,  
26 which was made possible by the current UK transparency provisions. It also is the first of its  
27 kind to explore payments across the four UK countries. To date, the spotlight has been on  
28 individual COIs, however this threatens to downplay the systemic problem of a broader  
29 institutional culture whereby industry funding is embraced and industry interests can be  
30 advanced<sup>3 90</sup>. However, it our study has limitations. We focus only on 2015 data due to the  
31 substantial time required to prepare Disclosure UK data for effective analysis, particularly  
32 categorising recipients to make them distinguishable and identifying recipient countries. We  
33 can assume the patterns are maintained over time as the overall payment values have  
34 remained stable each year<sup>29 91</sup>, however longitudinal analysis would confirm this. Also, we  
35 could not determine whether sharing recipients was accidental or intentional, nor did we  
36 measure the impact of these payments.  
37  
38  
39  
40

### 41 **Conclusions and policy implications**

42  
43 Our findings raise important questions regarding the risk of institutional COIs, particularly as  
44 the interests of patients and industry can be at odds<sup>67</sup>. Regional variability in payments has  
45 implications for subnational policymaking<sup>40</sup>. The variable prioritisation and significant  
46 differences in the distribution of payments to each recipient category suggests that  
47 companies strategically target recipients in individual countries based on policy  
48 responsibilities in each national government, perhaps following an assessment of the  
49 benefits of supporting particular organisations.  
50  
51  
52

53 The transparency issues we identified show the self-regulatory system is disjointed and  
54 requires better integration through a standardised database. As a minimum, compulsory  
55 recipient identifiers should be introduced. Disclosure UK needs to introduce detailed  
56 payment descriptions and outline each recipient's total annual income, currently a non-  
57 obligatory suggestion in the ABPI Code for payments to patient organisations<sup>92</sup>. This is  
58 especially pertinent to smaller recipients, for example in Northern Ireland, which may have  
59  
60



1  
2  
3 fewer funding options and therefore may be prone to dependency on industry funding<sup>43</sup>.  
4 Echoing calls in the US for state-specific disclosure policies<sup>40</sup>, Disclosure UK and disclosures  
5 of payments to patient organisations need to be adapted to better capture the distinction  
6 between payments in England, Scotland, Wales, and Northern Ireland.  
7  
8

9 However, although transparency is important it is not a panacea for the implicit bias caused  
10 by payments<sup>93</sup> or the corrosive impact financial COIs can have on the delivery of quality  
11 healthcare<sup>23 94</sup>. Identifying COIs is the first step<sup>90 95</sup>, but responding to them needs to come  
12 next<sup>23</sup>. In lieu of a response to calls for total eradication of industry payments<sup>94 96</sup>, our  
13 findings might inform future policies to mitigate against the risks posed by institutional COIs.  
14 In particular, recipient categories susceptible to high shares of industry funding in each  
15 country command increased regulatory oversight in the form of specific guidelines provided  
16 to companies and recipients by the ABPI.  
17  
18

19  
20 Our findings indicate payment strategies, particularly targeted recipients and payment  
21 types, differ between countries. Acknowledging sub-national institutional COIs is a crucial  
22 first step to better inform policy responses and reforms at the sub-national level. Future  
23 analysis of industry payments should explore these payments longitudinally.  
24  
25  
26  
27  
28  
29  
30  
31  
32  
33  
34  
35  
36  
37  
38  
39  
40  
41  
42  
43  
44  
45  
46  
47  
48  
49  
50  
51  
52  
53  
54  
55  
56  
57  
58  
59  
60

**Ethical approval**

The study did not require ethical approval (as it draws on publicly available data at the organisational level), however it is part of a bigger project which has ethical approval from the University of Bath's Social Sciences Research Ethics Committee (approval code: S19-073).

**Funding statement**

ER's work was supported by a +3 PhD Studentship award match-funded (50%) by the Economic and Social Research Council and the University of Bath. This work forms part of the PhD project. PO's work was supported by grants from The Swedish Research Council for Health, Working Life and Welfare (FORTE), no. 2016-00875, and The Swedish Research Council (VR), no. 2020-01822.

**Competing interests statement**

ER has no conflicts of interests to declare. PO's PhD student was supported by a grant from Sigma Pharmaceuticals, a UK pharmacy wholesaler and distributor (not a pharmaceutical company). The PhD work funded by Sigma Pharmaceuticals is unrelated to the subject of this paper.

**Author contributions**

ER designed, managed, analysed and interpreted the data, as well as drafted the article. PO conceived and designed the study, provided supervision, and drafted the article.

**Data statement**

Underlying data will be made publicly available on the Bath Research Data Archive upon publication.

## REFERENCES

1. Sismondo S. Ghost-managed medicine: Big pharma's invisible hands: Mattering Press 2018:8.
2. Rickard E, Ozieranski P. A hidden web of policy influence: The pharmaceutical industry's engagement with UK's All-Party Parliamentary Groups. *PLOS ONE* 2021;16(6):e0252551. doi: 10.1371/journal.pone.0252551
3. Marks JH. The perils of partnership: industry influence, institutional integrity, and public health: Oxford University Press 2019.
4. Agrawal S, Brennan N, Budetti P. The Sunshine Act—effects on physicians. *N Engl J Med* 2013;2013(368):2054-57.
5. Ahmed R, Bae S, Hicks CW, et al. Here Comes the Sunshine: Industry's Payments to Cardiothoracic Surgeons. *Annals of Thoracic Surgery* 2017;103(2):567-72. doi: 10.1016/j.athoracsur.2016.06.053
6. Braithwaite J, Frane N, Partan MJ, et al. Review of Industry Payments to General Orthopaedic Surgeons Reported by the Open Payments Database: 2014 to 2019. *JAAOS Global Research & Reviews* 2021;5(5)
7. Fleischman W, Ross JS, Melnick ER, et al. Financial Ties Between Emergency Physicians and Industry: Insights From Open Payments Data. *Annals of Emergency Medicine* 2016;68(2):153-58.e4. doi: 10.1016/j.annemergmed.2016.01.014
8. Maruf M, Sidana A, Fleischman W, et al. Financial Relationships between Urologists and Industry: An Analysis of Open Payments Data. *Urology Practice* 2018;5(3):180-86. doi: 10.1016/j.urpr.2017.03.012
9. Slentz DH, Nelson CC, Lichter PR. Characteristics of Industry Payments to Ophthalmologists in the Open Payments Database. *JAMA Ophthalmology* 2019;137(9):1038-44. doi: 10.1001/jamaophthalmol.2019.2456
10. Moynihan R, Fabbri A, Parker L, et al. Mixed methods evaluation of workshops for citizen health advocates about financial conflicts of interests in healthcare. *BMJ Open* 2020;10(5) doi: 10.1136/bmjopen-2019-034195
11. Ozieranski P, Csanadi M, Rickard E, et al. Analysis of Pharmaceutical Industry Payments to UK Health Care Organizations in 2015. *JAMA Network Open* 2019;2(6):e196253-e53. doi: 10.1001/jamanetworkopen.2019.6253
12. Parker L, Karanges EA, Bero L. Changes in the type and amount of spending disclosed by Australian pharmaceutical companies: an observational study. *BMJ open* 2019;9(2):e024928.
13. Fabbri A, Grundy Q, Mintzes B, et al. A cross-sectional analysis of pharmaceutical industry-funded events for health professionals in Australia. *BMJ open* 2017;7(6):e016701.
14. Moriarty F, Larkin J, Fahey T. Payments reported by the pharmaceutical industry in Ireland from 2015 to 2019: an observational study. *Health Policy* 2021 doi: <https://doi.org/10.1016/j.healthpol.2021.07.016>
15. Ozaki A, Saito H, Senoo Y, et al. Overview and transparency of non-research payments to healthcare organizations and healthcare professionals from pharmaceutical companies in Japan: Analysis of payment data in 2016. *Health Policy* 2020;124(7):727-35. doi: <https://doi.org/10.1016/j.healthpol.2020.03.011>

16. Ozaki A, Saito H, Onoue Y, et al. Pharmaceutical payments to certified oncology specialists in Japan in 2016: a retrospective observational cross-sectional analysis. *BMJ Open* 2019;9(9):e028805. doi: 10.1136/bmjopen-2018-028805
17. Anderson TS, Gellad WF, Good CB. Characteristics of biomedical industry payments to teaching hospitals. *Health Affairs* 2020;39(9):1583-91. doi: 10.1377/hlthaff.2020.00385
18. Rothman SM, Raveis VH, Friedman A, et al. Health advocacy organizations and the pharmaceutical industry: an analysis of disclosure practices. *American journal of public health* 2011;101(4):602-09.
19. McCoy MS, Carniol M, Chockley K, et al. Conflicts of interest for patient-advocacy organizations. *New England Journal of Medicine* 2017;376(9):880-85.
20. Rose SL, Highland J, Karafa MT, et al. Patient Advocacy Organizations, Industry Funding, and Conflicts of Interest. *JAMA Internal Medicine* 2017;177(3):344-50. doi: 10.1001/jamainternmed.2016.8443
21. Schafer A. Institutional conflict of interest: attempting to crack the deferiprone mystery. *Journal of Medical Ethics* 2021;47(8):531. doi: 10.1136/medethics-2019-105498
22. Lo YL. Further insights on institutional conflicts of interest in research settings. *Proceedings of Singapore Healthcare* 2020;29(1):3-4. doi: 10.1177/2010105820909983
23. Lo B, Field MJ. Conflict of interest in medical research, education, and practice. 2009
24. Lemmens T, Miller PB. The human subjects trade: ethical and legal issues surrounding recruitment incentives. *J Law Med Ethics* 2003;31(3):398-418. doi: 10.1111/j.1748-720x.2003.tb00103.x [published Online First: 2003/11/25]
25. Olivieri NF. Patients' health or company profits? The commercialisation of academic research. *Science and Engineering Ethics* 2003;9(1):29-41.
26. Ozieranski P, Martinon, L., Jachiet, P., Mulinari, S. Accessibility and quality of drug company disclosures of payments to healthcare professionals and organisations in 37 countries: A European policy review. *BMJ Open* 2021
27. Fabbri A, Parker L, Colombo C, et al. Industry funding of patient and health consumer organisations: systematic review with meta-analysis. *BMJ* 2020;368:l6925. doi: 10.1136/bmj.l6925
28. EFPIA. EFPIA CODE OF PRACTICE ON RELATIONSHIPS BETWEEN THE PHARMACEUTICAL INDUSTRY AND PATIENT ORGANISATIONS, 2011.
29. Ozieranski P, Rickard E, Mulinari S. Exposing drug industry funding of UK patient organisations. *Bmj* 2019;365:l1806. doi: 10.1136/bmj.l1806 [published Online First: 2019/05/28]
30. Ozieranski P, Csanadi M, Rickard E, et al. Underreporting of drug industry payments to patient organisations in the UK (2012-2016). 2020
31. Mulinari S, Vilhelmsson A, Rickard E, et al. Five years of pharmaceutical industry funding of patient organisations in Sweden: Cross-sectional study of companies, patient organisations and drugs. *PLOS ONE* 2020;15(6):e0235021. doi: 10.1371/journal.pone.0235021
32. Pashley D OP, Mulinari S. . Disclosure of pharmaceutical industry funding of patient organizations in Nordic countries: can industry self-regulation deliver on its transparency promise? *International Journal of Health Services* 2022
33. EFPIA. The EFPIA Disclosure Code: Your Questions Answered, 2014.

- 1
  - 2
  - 3
  - 4
  - 5
  - 6
  - 7
  - 8
  - 9
  - 10
  - 11
  - 12
  - 13
  - 14
  - 15
  - 16
  - 17
  - 18
  - 19
  - 20
  - 21
  - 22
  - 23
  - 24
  - 25
  - 26
  - 27
  - 28
  - 29
  - 30
  - 31
  - 32
  - 33
  - 34
  - 35
  - 36
  - 37
  - 38
  - 39
  - 40
  - 41
  - 42
  - 43
  - 44
  - 45
  - 46
  - 47
  - 48
  - 49
  - 50
  - 51
  - 52
  - 53
  - 54
  - 55
  - 56
  - 57
  - 58
  - 59
  - 60
34. Mulinari S, Ozieranski P. Disclosure of payments by pharmaceutical companies to healthcare professionals in the UK: analysis of the Association of the British Pharmaceutical Industry's Disclosure UK database, 2015 and 2016 cohorts. *BMJ open* 2018;8(10):e023094.
35. Keller AC, Packel L. Going for the cure: patient interest groups and health advocacy in the United States. *J Health Polit Policy Law* 2014;39(2):331-67. doi: 10.1215/03616878-2416238 [published Online First: 2013/12/07]
36. Hegde D, Sampat B. Can private money buy public science? Disease group lobbying and federal funding for biomedical research. *Management Science* 2015;61(10):2281-98.
37. Niforatos JD, Boas S, Hertz S, et al. Analysis of current financial relationships between emergency physicians and industry. *American Journal of Emergency Medicine* 2019;37(4):722-25. doi: 10.1016/j.ajem.2018.12.039
38. Cheng T, Boelitz K, Rybin D, et al. Nationwide patterns in industry payments to academic vascular surgeons. *Journal of Vascular Surgery* 2021;73(2):675-81. doi: 10.1016/j.jvs.2020.04.527
39. Garstka ME, Monlezun D, DuCoin C, et al. The Sunshine Act and surgeons: a nation-wide analysis of industry payments to physicians. *Journal of Surgical Research* 2019;233:41-49. doi: 10.1016/j.jss.2018.07.004
40. Cuomo RE, Cai M, Shah N, et al. Physicians payment in the United States between 2014 and 2018: An analysis of the CMS Open Payments database. *PLOS ONE* 2021;16(6):e0252656. doi: 10.1371/journal.pone.0252656
41. Mejia J, Mejia A, Pestilli F. Open data on industry payments to healthcare providers reveal potential hidden costs to the public. *Nature Communications* 2019;10(1) doi: 10.1038/s41467-019-12317-z
42. Mulinari S, Martinon L, Jachiet P-A, et al. Pharmaceutical industry self-regulation and non-transparency: country and company level analysis of payments to healthcare professionals in seven European countries. *Health Policy* 2021;125(7):915-22. doi: <https://doi.org/10.1016/j.healthpol.2021.04.015>
43. Ozieranski P, Pitter J, Rickard E, et al. A "patient-industry complex"? Investigating the financial dependency of UK patient organisations on drug company funding. *Sociology of Health & Illness* 2021
44. EFPIA. The Pharmaceutical Industry in Figures, 2016.
45. Hyndman N. Editorial: The charity sector— changing times, changing challenges. *Public Money & Management* 2017;37(3):149-53. doi: 10.1080/09540962.2017.1281608
46. Greer SL. Territorial politics and health policy: UK health policy in comparative perspective: Manchester University Press 2004.
47. Birrell D. Comparing devolved governance: Palgrave Macmillan 2012.
48. Cheung A, Paun A, Valsamidis L. Devolution at 20. Institute for Government, 2019.
49. ONS. Population estimates for the UK, England and Wales, Scotland and Northern Ireland: mid-2015 2016 [Available from: <https://www.ons.gov.uk/peoplepopulationandcommunity/populationandmigration/populationestimates/bulletins/annualmidyearpopulationestimates/mid2015> accessed 13th September 2021.
50. Office for National Statistics. Life expectancy for local areas of the UK: between 2001 to 2003 and 2017 to 2019 2020 [Available from: <https://www.ons.gov.uk/peoplepopulationandcommunity/healthandsocialcare/health>

[thandlelifeexpectancies/bulletins/lifeexpectancyforlocalareasoftheuk/between2001to2003and2017to2019](#) accessed 28th August 2021.

51. The Pharmaceutical Journal. Wales has highest number of prescriptions per head of population among UK countries 2021 [Available from: <https://pharmaceutical-journal.com/article/news/wales-has-highest-number-of-prescriptions-per-head-of-population-among-uk-countries> accessed 30th November 2021.
52. Lexchin J. Pharmaceutical company spending on research and development and promotion in Canada, 2013-2016: a cohort analysis. *J Pharm Policy Pract* 2018;11:5-5. doi: 10.1186/s40545-018-0132-3
53. Ozieranski P, King LP. Governing drug reimbursement policy in Poland: The role of the state, civil society, and the private sector. *Theory and Society* 2017;46(6):577-610. doi: 10.1007/s11186-017-9300-8
54. Orientation Marketing Insights. The Pharmaceutical Marketer's Guide.
55. Moberly T. CCGs fail to declare pharma funding. *BMJ* 2018;360:j5911. doi: 10.1136/bmj.j5911
56. Saghy E, Mulinari S, Ozieranski P. Drug company payments to General Practices in England: cross-sectional and social network analysis. *PLOS ONE* 2021
57. Association of the British Pharmaceutical Industry. CODE OF PRACTICE for the PHARMACEUTICAL INDUSTRY 2015, 2015.
58. Snijders TA, Faye M, Brailly J. Network dynamics with a nested node set: Sociability in seven villages in Senegal. *Statistica Neerlandica* 2020;74(3):300-23.
59. Borgatti SP, Everett, M.G. and Freeman, L.C. . Ucinet for Windows: Software for Social Network Analysis. Harvard, MA: Analytic Technologies 2002.
60. Rickard E, Ozieranski P, Mulinari S. Evaluating the transparency of pharmaceutical company disclosure of payments to patient organisations in the UK. *Health Policy* 2019;123(12):1244-50.
61. Greer SL. Devolution and health in the UK: policy and its lessons since 1998. *British Medical Bulletin* 2016;118(1):16.
62. Harker R. NHS Funding and Expenditure. Commons Library Briefing, 2019.
63. Neuman J, Korenstein D, Ross JS, et al. Prevalence of financial conflicts of interest among panel members producing clinical practice guidelines in Canada and United States: cross sectional study. *BMJ* 2011;343:d5621. doi: 10.1136/bmj.d5621
64. Moynihan R, Albarqouni L, Nangla C, et al. Financial ties between leaders of influential US professional medical associations and industry: Cross sectional study. *The BMJ* 2020;369 doi: 10.1136/bmj.m1505
65. Sismondo S. Key opinion leaders and the corruption of medical knowledge: what the Sunshine Act will and won't cast light on: SAGE Publications Sage CA: Los Angeles, CA, 2013.
66. Madureira Lima J, Galea S. Corporate practices and health: a framework and mechanisms. *Globalization and Health* 2018;14(1):21. doi: 10.1186/s12992-018-0336-y
67. House of Commons Health Committee. The Influence of the Pharmaceutical Industry, 2005.
68. Mitchell AP, Basch EM, Dusetzina SB. Financial relationships with industry among national comprehensive cancer network guideline authors. *JAMA Oncology* 2016;2(12):1628-31. doi: 10.1001/jamaoncol.2016.2710

- 1  
2  
3  
4  
5  
6  
7  
8  
9  
10  
11  
12  
13  
14  
15  
16  
17  
18  
19  
20  
21  
22  
23  
24  
25  
26  
27  
28  
29  
30  
31  
32  
33  
34  
35  
36  
37  
38  
39  
40  
41  
42  
43  
44  
45  
46  
47  
48  
49  
50  
51  
52  
53  
54  
55  
56  
57  
58  
59  
60
69. Saito H, Tani Y, Ozaki A, et al. Financial ties between authors of the clinical practice guidelines and pharmaceutical companies: an example from Japan. *Clinical Microbiology and Infection* 2019;25(11):1304-06. doi: <https://doi.org/10.1016/j.cmi.2019.07.025>
70. The Guardian. University league table 2015 - the complete list 2014 [Available from: <https://www.theguardian.com/education/ng-interactive/2014/jun/02/university-league-tables-2015-the-complete-list> accessed 6th December 2021.
71. Nayak RK, Avorn J, Kesselheim AS. Public sector financial support for late stage discovery of new drugs in the United States: cohort study. *BMJ* 2019;367:l5766. doi: 10.1136/bmj.l5766
72. Angell M. The truth about the drug companies: How they deceive us and what to do about it: Random House Incorporated 2005.
73. Fugh-Berman A. Industry-funded medical education is always promotion—an essay by Adriane Fugh-Berman. *BMJ* 2021;373:n1273. doi: 10.1136/bmj.n1273
74. Spithoff S. Industry involvement in continuing medical education: time to say no. *Can Fam Physician* 2014;60(8):694-703.
75. Pereira Gray D, White E, Russell G. Medicalisation in the UK: changing dynamics, but still ongoing. *Journal of the Royal Society of Medicine* 2015;109(1):7-11. doi: 10.1177/0141076815600908
76. Abraham J. The sociological concomitants of the pharmaceutical industry and medications. *Handbook of medical sociology* 2010;6:290-308.
77. Bhalla G, Evgeniou T, Lerer L. Customer Relationship Management and Networked Healthcare in the Pharmaceutical Industry. *Journal of Medical Marketing* 2004;4(4):370-79. doi: 10.1057/palgrave.jmm.5040188
78. Heesters M. An assault on the business of pharmaceutical data mining. *U Pa J Bus L* 2008;11:789.
79. Sullivan T. Open Payments for All – Cresen Solutions Launches PowerCMS™ 2019 [Available from: <https://www.policymed.com/2019/06/open-payments-for-all-cresen-solutions-launches-powercms.html> accessed 30th November 2021.
80. Anand R CD, Yan J, et al. Leveraging CMS Open Payments Data to Identify Channel Preferences and Gather Competitive Intelligence, Thereby Improving HCP Targeting. *Journal of the Pharmaceutical Management Science Association* 2017 doi: <https://www.pmsa.org/jpmsa-vol05-article06>
81. VOXX Analytics. VOXX Products 2017 [Available from: <http://www.voxxanalytics.com/products> accessed July 2019.
82. Hollands S. Receipt of Promotional Payments at the Individual and Physician Network Level Associated with Higher Branded Antipsychotic Prescribing Rates. *Adm Policy Ment Health* 2020;47(1):73-85. doi: 10.1007/s10488-019-00974-7
83. Edgar A. The dominance of big pharma: power. *Medicine, Health Care and Philosophy* 2013;16(2):295-304. doi: 10.1007/s11019-012-9385-9
84. Association of the British Pharmaceutical Industry. Joint Working: A toolkit for industry and the NHS, 2019.
85. Timmins N. The four UK health systems. Learning from each other: The King's Fund, 2013.
86. Moberly T. NHS joint working with industry is out of public sight. *BMJ* 2019;364:l1353. doi: 10.1136/bmj.l1353

- 1  
2  
3 87. Paun A, Cheung A, Nicholson E. Funding Devolution: The Barnett formula in theory and  
4 practice. In: Government IF, ed., 2021.  
5  
6 88. Greer SL. Four way bet: how devolution has led to four different models for the NHS:  
7 Constitution Unit London 2004.  
8  
9 89. Bayer. Methodology Note, 2021.  
10  
11 90. Marks JH. Lessons from Corporate Influence in the Opioid Epidemic: Toward a Norm of  
12 Separation. *Journal of Bioethical Inquiry* 2020;17(2):173-89. doi: 10.1007/s11673-  
13 020-09982-x  
14  
15 91. ABPI. Disclosure UK 2022 [Available from:  
16 <https://www.abpi.org.uk/reputation/disclosure-uk/>.  
17  
18 92. Association of the British Pharmaceutical Industry. CODE OF PRACTICE for the  
19 PHARMACEUTICAL INDUSTRY 2019, 2019.  
20  
21 93. Basken P. Why disclosure policies don't discourage academe's drug salesmen. 2017  
22 [Available from: [https://www.chronicle.com/article/why-disclosure-policies-dont-](https://www.chronicle.com/article/why-disclosure-policies-dont-discourage-academes-drug-salesmen/)  
23 [discourage-academes-drug-salesmen/](https://www.chronicle.com/article/why-disclosure-policies-dont-discourage-academes-drug-salesmen/) accessed 30th November 2021.  
24  
25 94. Lexchin J, Fugh-Berman A. A Ray of Sunshine: Transparency in Physician-Industry  
26 Relationships Is Not Enough. *Journal of General Internal Medicine* 2021 doi:  
27 10.1007/s11606-021-06657-0  
28  
29 95. Bachynski KE, Goldberg DS. Time out: NFL conflicts of interest with public health efforts  
30 to prevent TBI. *Injury Prevention* 2018;24(3):180-84.  
31  
32 96. Wilson M. The Sunshine Act: commercial conflicts of interest and the limits of  
33 transparency. *Open Med* 2014;8(1):e10-e13.  
34  
35  
36  
37  
38  
39  
40  
41  
42  
43  
44  
45  
46  
47  
48  
49  
50  
51  
52  
53  
54  
55  
56  
57  
58  
59  
60



1  
2  
3  
4  
5  
6  
7  
8  
9  
10  
11  
12  
13  
14  
15  
16  
17  
18  
19  
20  
21  
22  
23  
24  
25  
26  
27  
28  
29  
30  
31  
32  
33  
34  
35  
36  
37  
38  
39  
40  
41  
42  
43  
44  
45  
46  
47  
48  
49  
50  
51  
52  
53  
54  
55  
56  
57  
58  
59  
60

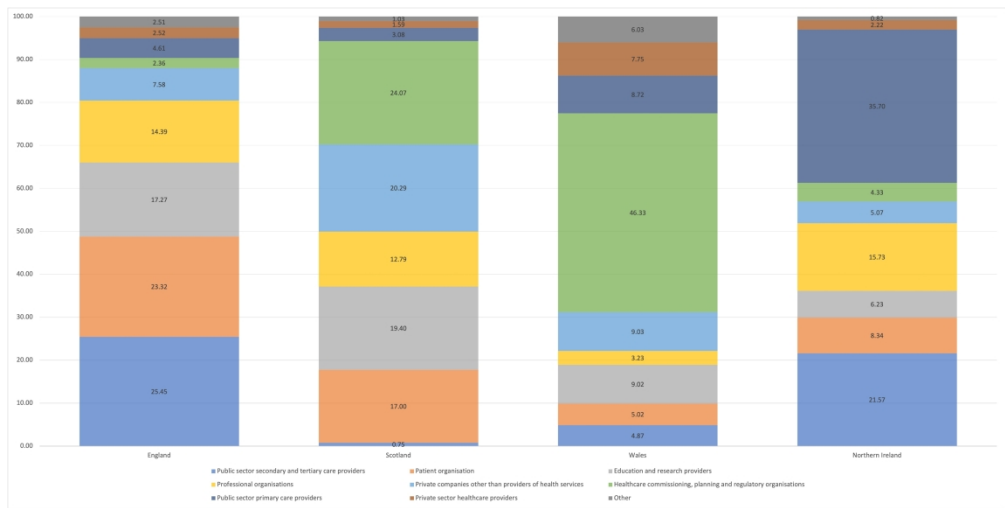

Percentage of payments to recipients in each category per country

442x222mm (300 x 300 DPI)

1  
2  
3  
4  
5  
6  
7  
8  
9  
10  
11  
12  
13  
14  
15  
16  
17  
18  
19  
20  
21  
22  
23  
24  
25  
26  
27  
28  
29  
30  
31  
32  
33  
34  
35  
36  
37  
38  
39  
40  
41  
42  
43  
44  
45  
46  
47  
48  
49  
50  
51  
52  
53  
54  
55  
56  
57  
58  
59  
60

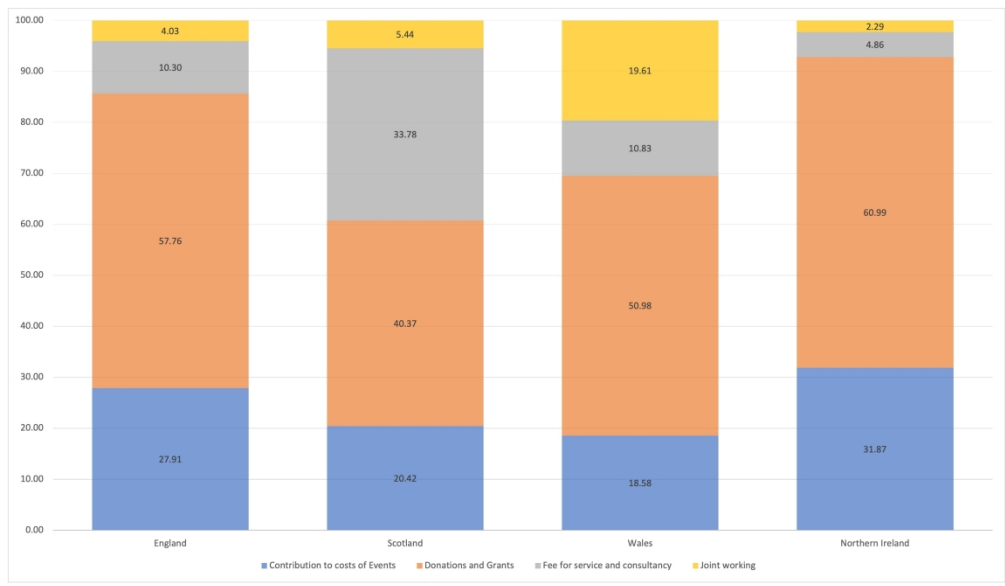

Percentage of total value for each payment type

314x181mm (300 x 300 DPI)

## Supplementary file contents:

| <b>Supplementary File</b>                                                                                                   | <b>Page</b> |
|-----------------------------------------------------------------------------------------------------------------------------|-------------|
| Supplementary File 1. Payment types included in Disclosure UK and patient organisation codes applied to Disclosure UK codes | 2           |
| Supplementary File 2. Recipient category descriptions and examples                                                          | 3-4         |
| Supplementary File 3. Additional details on network statistics used                                                         | 5           |
| Supplementary File 4. Data integration flowchart                                                                            | 6           |
| Supplementary File 5. Top 10% of donors in each country                                                                     | 7           |
| Supplementary File 6. Visualised networks for England (a), Scotland (b), Wales (c), Northern Ireland (d)                    | 8-11        |
| Supplementary File 7. Top ten companies by degree centrality scores in each country                                         | 12          |
| Supplementary File 8. Descriptive statistics for each recipient category                                                    | 13-15       |
| Supplementary File 9. Top 10 recipients in each country                                                                     | 16-17       |
| Supplementary File 10. Post-hoc Bonferroni pairwise comparisons between countries of payments per category                  | 18-20       |
| Supplementary File 11. Post-hoc Bonferroni pairwise comparisons between countries of payment types                          | 21          |

Supplementary File 1. Payment types included in Disclosure UK and patient organisation codes applied to Disclosure UK codes

| Payment type                    | Description of payment type                                                                                                                                                                                                                                                                                                                                                                                                                           | Patient organisation payments subsumed within the payment type                                                                                                                                         |
|---------------------------------|-------------------------------------------------------------------------------------------------------------------------------------------------------------------------------------------------------------------------------------------------------------------------------------------------------------------------------------------------------------------------------------------------------------------------------------------------------|--------------------------------------------------------------------------------------------------------------------------------------------------------------------------------------------------------|
| Contribution to costs of Events | <p>Contribution to costs related to Events, through HCOs or Third Parties, including support to HCPs to attend Events, such as:</p> <ul style="list-style-type: none"> <li>• Registration fees;</li> <li>• Sponsorship agreements with HCOs or with Third Parties appointed by an HCO to manage an Event; and</li> <li>• Travel and accommodation (EFPIA Code of Practice 2019, p. 30)</li> </ul>                                                     | contributions to costs of events organised by recipients or third parties; travel, accommodation and registration fees                                                                                 |
| Donations and Grants to HCOs    | <p>Donations and Grants to HCOs that support healthcare, including donations and grants (either cash or benefits in kind) to institutions, organisations or associations that are comprised of HCPs and/or that provide healthcare (EFPIA Code of Practice 2019, p. 30)</p>                                                                                                                                                                           | donations; grants; corporate member, supporter, sponsor or partner; purchases and subscriptions from patient organisations; more than one distinct payment form; form of funding unclear; sponsorships |
| Fee for service and consultancy | <p>Payments resulting from or related to contracts between Member Companies and HCOs under which such HCOs provide any type of services to a Member Company or any other type of funding not covered in the previous categories. Fees, on the one hand, and on the other hand payments relating to expenses agreed in the written agreement covering the activity will be disclosed as two separate amounts. (EFPIA Code of Practice 2019, p. 30)</p> | fees for service and consultancy (including travel and accommodation); support, help and contributions                                                                                                 |
| Joint working                   | <p>The Department of Health defines joint working between the NHS and the pharmaceutical industry as situations where, for the benefit of patients, one or more pharmaceutical companies and the NHS pool skills, experience and/or resources for the joint development and implementation of patient centred projects and share a commitment to successful delivery. (ABPI Code of Practice 2015, Clause 20, p. 30)</p>                              | n/a                                                                                                                                                                                                    |

Supplementary File 2. Recipient category descriptions and examples

| Recipient category                                                                                                     | Category description                                                                                                                    | Examples (country-specific examples where applicable)                                                                                                                                                                                                                                                                                                                                                                                                                                                                                                                                                                                                                                                                                                  |
|------------------------------------------------------------------------------------------------------------------------|-----------------------------------------------------------------------------------------------------------------------------------------|--------------------------------------------------------------------------------------------------------------------------------------------------------------------------------------------------------------------------------------------------------------------------------------------------------------------------------------------------------------------------------------------------------------------------------------------------------------------------------------------------------------------------------------------------------------------------------------------------------------------------------------------------------------------------------------------------------------------------------------------------------|
| Alternative providers of health services                                                                               | Charities, not-for-profit companies, social enterprises and community interest companies providing health services                      | <ul style="list-style-type: none"> <li>- social enterprise delivering primary or secondary care health services</li> <li>- nursing or care home run by a community interest company (CIC)</li> <li>- hospital, hospice, or nursing home with a charitable status</li> </ul>                                                                                                                                                                                                                                                                                                                                                                                                                                                                            |
| Education and research providers                                                                                       | Universities, charities, and noncommercial institutes undertaking research                                                              | <ul style="list-style-type: none"> <li>- university</li> <li>- research institute at a NHS organisation</li> <li>- charity focusing on undertaking medical research</li> </ul>                                                                                                                                                                                                                                                                                                                                                                                                                                                                                                                                                                         |
| Formal bodies representing healthcare professionals or patients                                                        | Local medical, optical, optometric, or pharmaceutical committees and statutory bodies representing healthcare professionals or patients | <ul style="list-style-type: none"> <li>- local medical committees (LMC)</li> <li>- local optical or optometric committee (LOC)</li> </ul> <p><i>England</i></p> <ul style="list-style-type: none"> <li>- local pharmaceutical committee (LPC)</li> </ul>                                                                                                                                                                                                                                                                                                                                                                                                                                                                                               |
| Charities and other third-sector organisations (excluding providers of health services and professional organisations) | Organisations (not patient organisations) focusing on education, research, advocacy, and multipurpose organisations                     | <ul style="list-style-type: none"> <li>- third-sector organisation (non-charity) or charity focused on funding medical research</li> <li>- Multipurpose third-sector organisation (non-charity)</li> <li>- charity focused on providing funding or material support to patients or NHS organisations</li> </ul>                                                                                                                                                                                                                                                                                                                                                                                                                                        |
| Healthcare commissioning, planning and regulatory organisations                                                        | Local, regional, and commissioning, planning, or regulatory organisations                                                               | <ul style="list-style-type: none"> <li>- primary care trust (PCT)</li> <li>- NHS Shared Business Services</li> <li>- National Institute for Health and Care Excellence (NICE)</li> <li>- Public Health England</li> </ul> <p><i>England</i></p> <ul style="list-style-type: none"> <li>- Clinical commissioning group</li> <li>- Locality group</li> <li>- Area prescribing committee</li> <li>- Local commissioning group</li> <li>- NHS England</li> </ul> <p><i>Scotland</i></p> <ul style="list-style-type: none"> <li>- Regional NHS board</li> <li>- Area pharmaceutical committee</li> </ul> <p><i>Wales</i></p> <ul style="list-style-type: none"> <li>- Health board</li> <li>- Public health Wales</li> </ul> <p><i>Northern Ireland</i></p> |

|                                                           |                                                                                                                                            |                                                                                                                                                                                                                                                                                                                                 |
|-----------------------------------------------------------|--------------------------------------------------------------------------------------------------------------------------------------------|---------------------------------------------------------------------------------------------------------------------------------------------------------------------------------------------------------------------------------------------------------------------------------------------------------------------------------|
|                                                           |                                                                                                                                            | <ul style="list-style-type: none"> <li>- Health and social care board</li> <li>- Local commissioning group</li> </ul>                                                                                                                                                                                                           |
| Patient organisations                                     | Organisations focusing on supporting education, research, advocacy, and multipurpose organisations                                         | <ul style="list-style-type: none"> <li>- Hospital charities</li> </ul>                                                                                                                                                                                                                                                          |
| Private companies other than providers of health services | Providers of medical communications or training services, commercial or medical research services, and accountancy or consultancy services | <ul style="list-style-type: none"> <li>- manufacturer or supplier of medical devices or technologies</li> <li>- pharmacy wholesaler or distributor</li> <li>- event management services</li> <li>- journal or publishing company</li> <li>- clinical or contract research organisation</li> <li>- private laboratory</li> </ul> |
| Private sector healthcare providers                       | Private clinics and hospitals, healthcare groups, and providers of dental, pharmacy, and optical services                                  | <ul style="list-style-type: none"> <li>- dental practice</li> <li>- pharmacy or chemist</li> <li>- opticians</li> <li>- private clinic, surgery, practice, or hospital</li> <li>- private company providing community health or social care services</li> </ul>                                                                 |
| Professional organisations                                | Organisations of medical professionals, other healthcare professionals, or non-healthcare professionals                                    | <ul style="list-style-type: none"> <li>- organisation of medical professionals (doctors)</li> <li>- royal college - medical professionals</li> <li>- alliance or coalition of professional associations or groups</li> <li>- professional organisation of pharmacists or pharmacy technicians</li> </ul>                        |
| Public administration and providers of public services    | Central UK government bodies, devolved administrations in Scotland, Wales, and Northern Ireland, and local authorities                     | <ul style="list-style-type: none"> <li>- district, city, country, or borough council</li> <li>- prison</li> <li>- devolved administrations</li> <li>- central government bodies</li> </ul>                                                                                                                                      |
| Public sector primary care providers                      | General practitioner surgeries, medical practice centres, groups of surgeries or medical practices, and healthcare or medical groups       | <ul style="list-style-type: none"> <li>- GP practice, surgery, medical practice or family practice</li> <li>- health centre, medical centre or primary care centre</li> <li>- group of surgeries or medical practices</li> </ul>                                                                                                |
| Public sector secondary and tertiary care providers       | NHS trusts, NHS hospitals, and networks and collaboratives of NHS organisations                                                            | <ul style="list-style-type: none"> <li>- NHS hospital</li> <li>- NHS Foundation Trust</li> <li>- NHS Trust</li> <li>- strategic clinical network (SCN)</li> </ul> <p><i>Scotland</i></p> <ul style="list-style-type: none"> <li>- managed clinical network (MCN)</li> </ul>                                                     |

1  
2  
3  
4  
5  
6  
7  
8  
9  
10  
11  
12  
13  
14  
15  
16  
17  
18  
19  
20  
21  
22  
23  
24  
25  
26  
27  
28  
29  
30  
31  
32  
33  
34  
35  
36  
37  
38  
39  
40  
41  
42  
43  
44  
45  
46  
47  
48  
49  
50  
51  
52  
53  
54  
55  
56  
57  
58  
59  
60

### Supplementary File 3. Additional details on network statistics used

We calculated *density* scores, a measure of the overall level of connection within a network, which provides two network-level values – average value and average weighted degree. First, average value density computes the average tie strength, or the average number of recipients each *pair* of companies in the network shares<sup>58</sup>. Second, average weighted degree density computes the total number of ties for each company and then averages them. The higher the density scores, the more connected by recipients the companies are<sup>59</sup>. Density adjusts for the number of nodes, or companies, in the network, improving comparability between groups<sup>60</sup>.

We also calculated *degree centrality*, which provides a score for each individual company based on the number of shared recipients it has with *all* other companies in the network. The higher the degree centrality, the more central the drug company is<sup>61</sup>. From a marketing perspective, this reveals the dominant companies that appear to purposely target key areas of shared interest through providing payments to the same recipients as other companies, which can, in turn, be compared between recipient countries and categories, as well as to the value of payments.

Supplementary File 4. Data integration flowchart

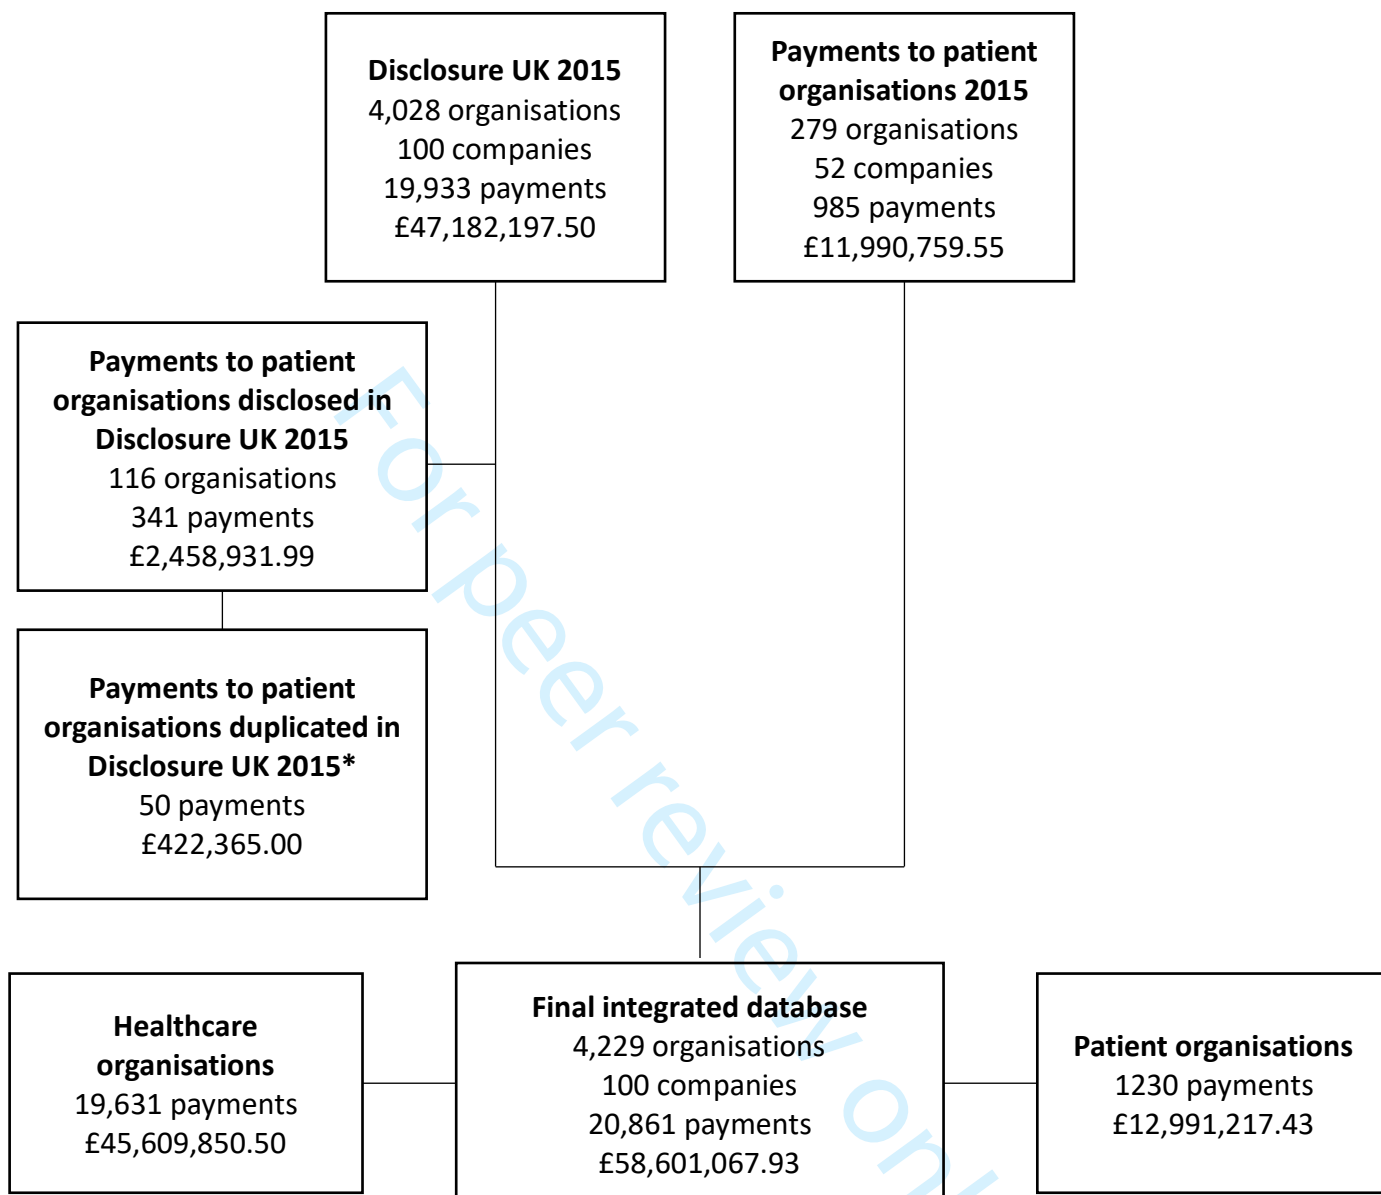

\* This is the number and value of payments excluded to ensure no payment was counted twice



Supplementary File 5. Top 10% of donors in each country

| Country          | Company (revenue ranking) | Payment value - £ (%) | Payments – n (%)   |
|------------------|---------------------------|-----------------------|--------------------|
| England          | Pfizer (2)                | 5,292,130.74 (10.09)  | 1636 (8.99)        |
|                  | Novartis (7)              | 3,564,500.43 (6.80)   | 460 (2.53)         |
|                  | Bayer (8)                 | 3,476,304.44 (6.63)   | 2110 (11.60)       |
|                  | GlaxoSmithKline (4)       | 3,291,496.35 (6.28)   | 1076 (5.92)        |
|                  | AstraZeneca (1)           | 2,779,000.54 (5.30)   | 1279 (7.03)        |
|                  | Janssen-Cilag (10)        | 2,387,242.64 (4.55)   | 722 (3.97)         |
|                  | UCB Pharma (30)           | 2,204,967.90 (4.20)   | 74 (0.41)          |
|                  | Astellas Pharma (21)      | 2,044,050.60 (3.90)   | 311 (1.71)         |
|                  | Roche (5)                 | 1,931,651.77 (3.68)   | 173 (0.95)         |
|                  | Biogen Idec (23)          | 1,886,879.26 (3.60)   | 83 (0.46)          |
|                  | Top 10% total             | 28,858,224.67 (55.03) | 7924 (43.56)       |
| Scotland         | Biogen Idec (24)          | 733,104.05 (20.09)    | 7 (0.51)           |
|                  | Takeda UK (38)            | 274,952.71 (7.53)     | 25 (1.82)          |
|                  | Pfizer (2)                | 250,859.45 (6.87)     | 143 (10.44)        |
|                  | Bayer (8)                 | 215,930.76 (5.92)     | 164 (11.97)        |
|                  | Novartis (7)              | 199,703.97 (5.47)     | 48 (3.50)          |
|                  | Bristol-Myers Squibb (23) | 183,959.00 (5.04)     | 51 (3.72)          |
|                  | AstraZeneca (1)           | 178,848.49 (4.90)     | 75 (5.47)          |
|                  | Top 10% total             | 2,037,358.42 (55.82)  | 513 (37.45)        |
| Wales            | Pfizer (2)                | 284,719.57 (14.32)    | 102 (10.30)        |
|                  | Roche (5)                 | 230,090.90 (11.58)    | 10 (1.01)          |
|                  | Novartis (7)              | 177,069.59 (8.91)     | 36 (3.64)          |
|                  | AstraZeneca (1)           | 148,288.67 (7.46)     | 79 (7.98)          |
|                  | Janssen-Cilag (10)        | 122,237.44 (6.15)     | 22 (2.22)          |
|                  | Biogen (24)               | 112,428.62 (5.66)     | 7 (0.71)           |
|                  | Top 10% total             | 1,074,834.80 (54.07)  | 256 (25.86)        |
| Northern Ireland | Sanofi Aventis (13)       | 92,252.80 (17.81)     | 24 (7.72)          |
|                  | Pfizer (2)                | 86,639.31 (16.73)     | 45 (14.47)         |
|                  | Napp Pharmaceuticals (29) | 83,252.29 (16.07)     | 45 (14.47)         |
|                  | Bayer (8)                 | 37,959.50 (7.33)      | 75 (24.12)         |
|                  |                           | Top 10% total         | 300,103.90 (57.94) |

\*Value as proportion of all payments in each country

Supplementary File 6. Visualised networks for England (a), Scotland (b), Wales (c), Northern Ireland (d)

Supplementary File 5a. England's network

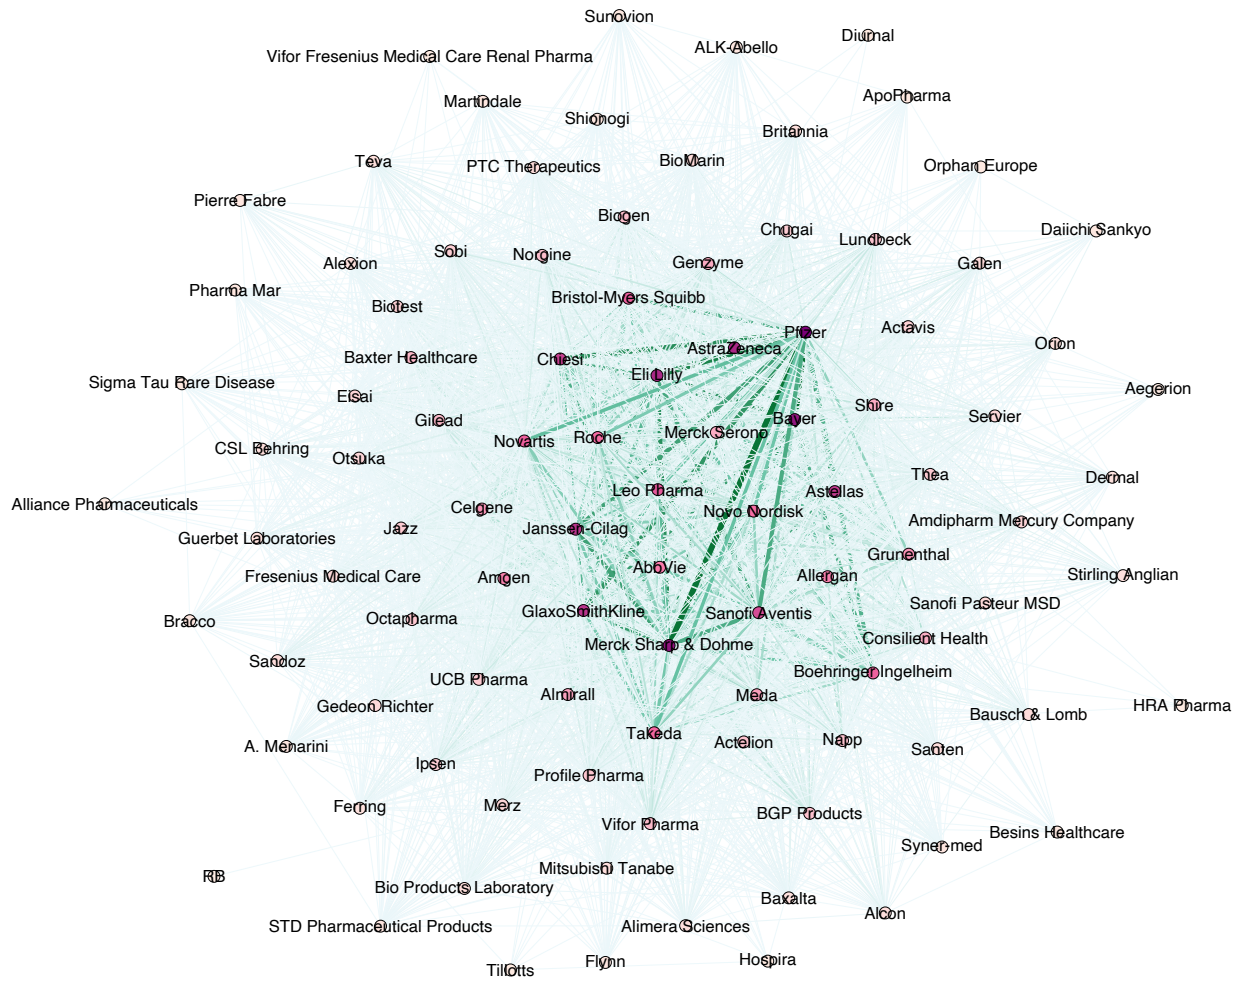

Supplementary File 6b. Scotland's network

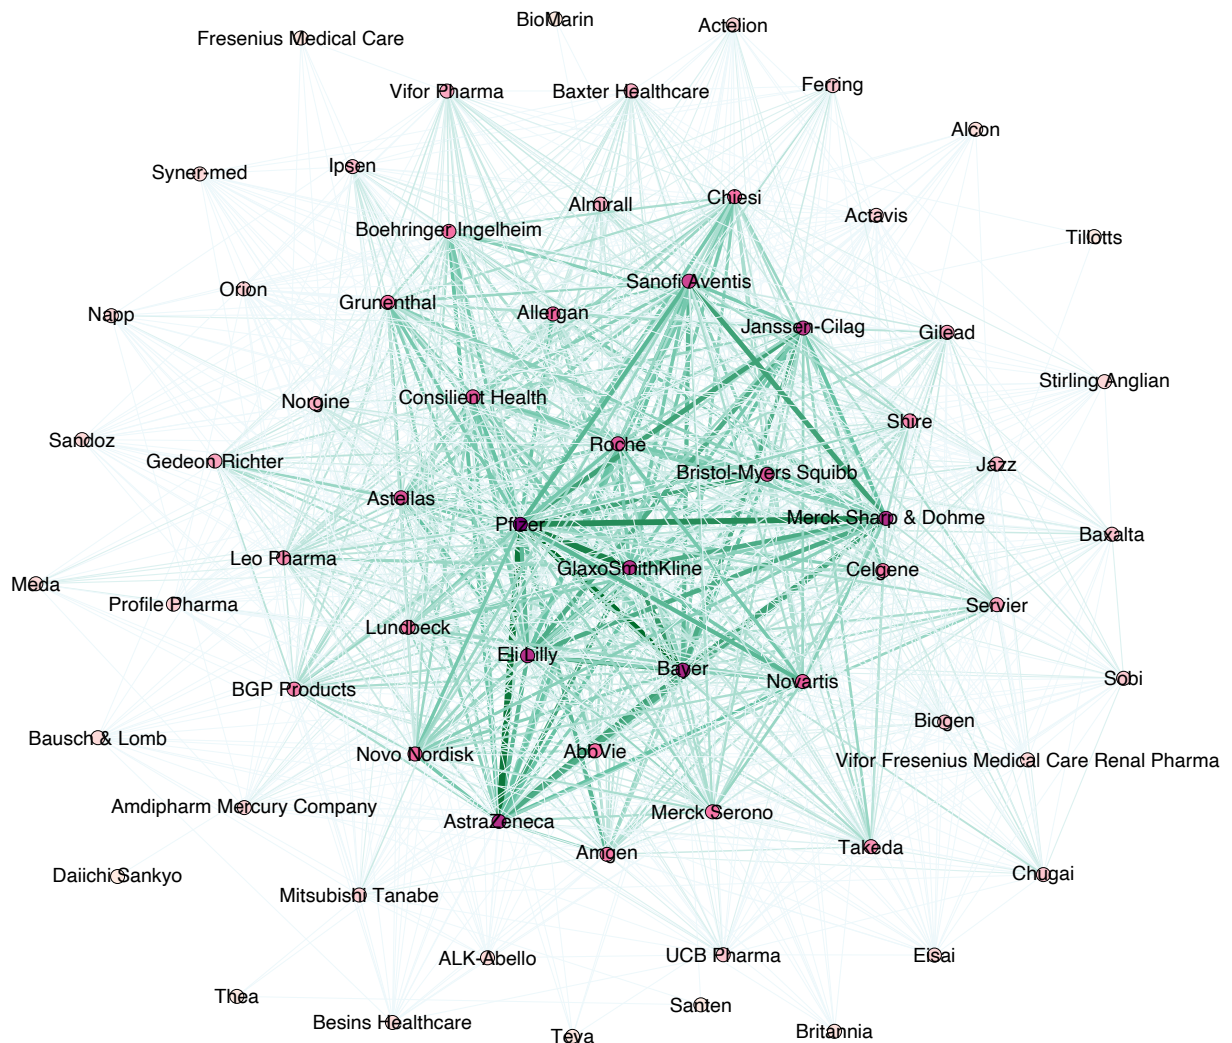

only

Supplementary File 6c. Wales' network

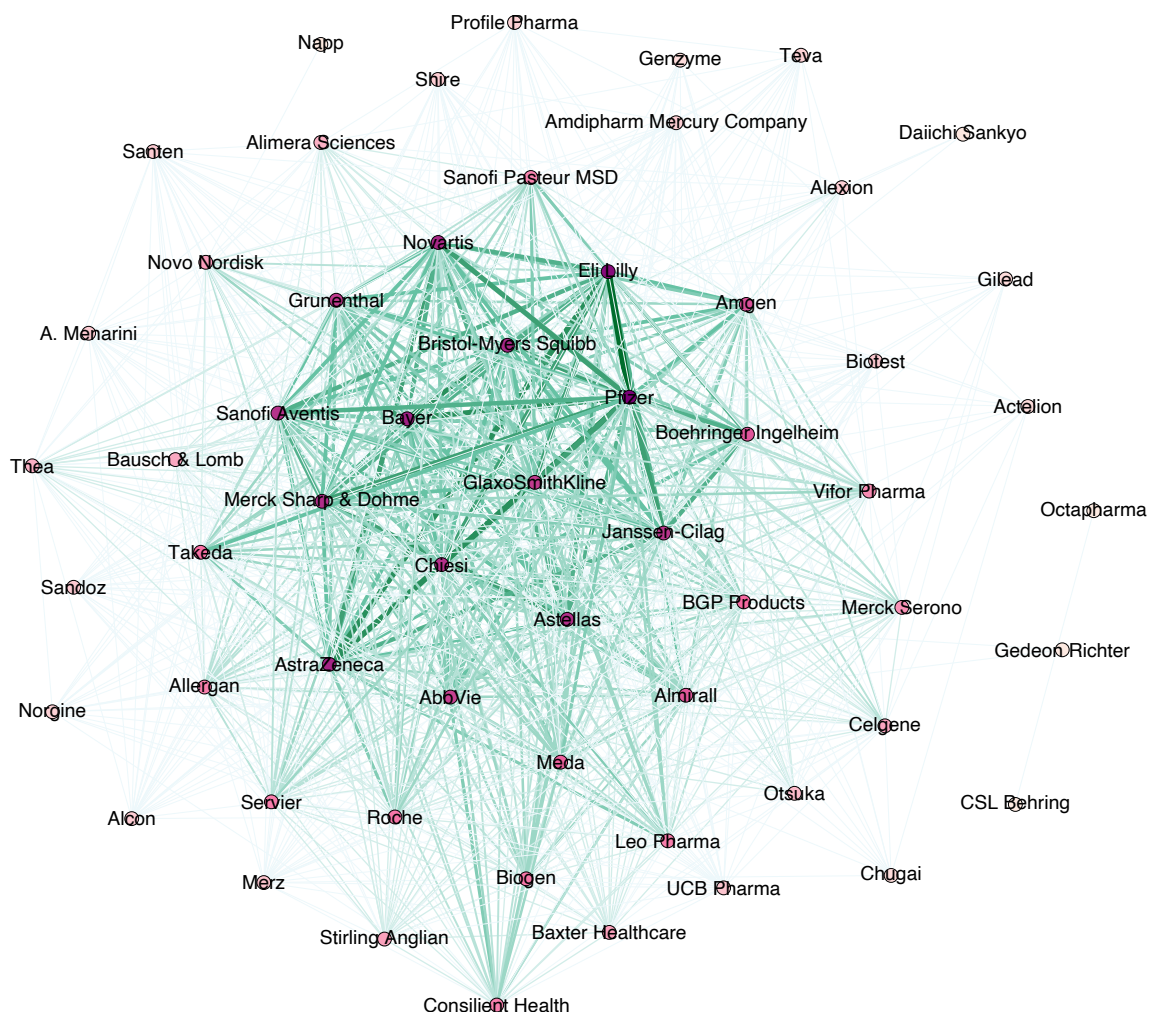

## Supplementary File 6d. Northern Ireland's network

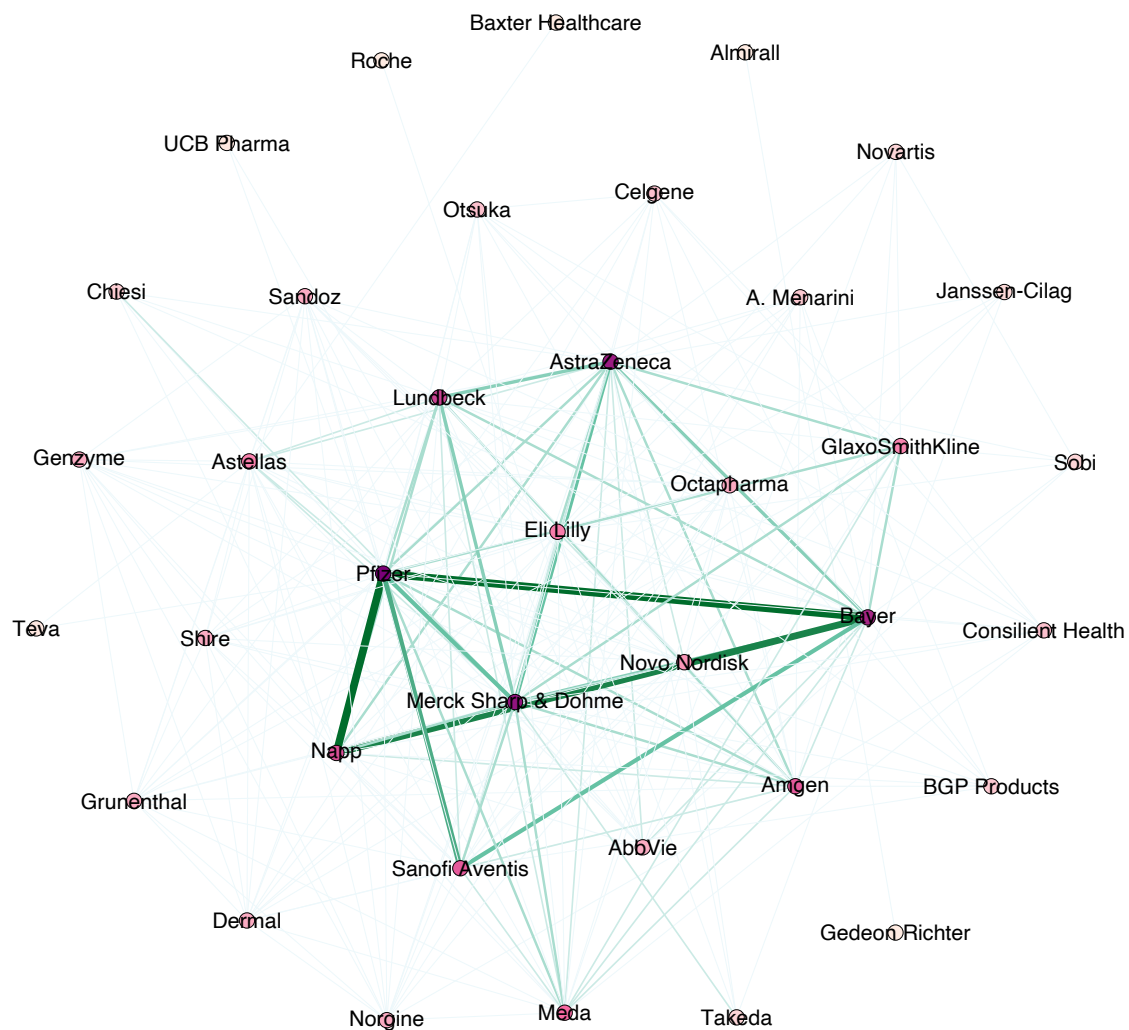

Note. All networks were visualised in Gephi v 0.9.2. Node label size and darkness corresponds to the weighted degree centrality of each company; the size and darkness of the edges (connecting lines) correspond to the number of shared recipients between companies

Supplementary File 7. Top ten companies by degree centrality scores in each country

| England                 |        | Scotland                  |        | Wales                     |        | Northern Ireland          |        |
|-------------------------|--------|---------------------------|--------|---------------------------|--------|---------------------------|--------|
| Company                 | Degree | Company                   | Degree | Company                   | Degree | Company                   | Degree |
| Pfizer (2)              | 3394   | Pfizer (2)                | 319    | Pfizer (2)                | 206    | Pfizer (2)                | 63     |
| Merck Sharp & Dohme (6) | 3064   | Bayer (8)                 | 260    | Eli Lilly (3)             | 196    | Merck Sharp & Dohme (6)   | 57     |
| Bayer (8)               | 3060   | Merck Sharp & Dohme (6)   | 251    | Bayer (8)                 | 176    | AstraZeneca (1)           | 55     |
| AstraZeneca (1)         | 2755   | AstraZeneca (1)           | 245    | AstraZeneca (1)           | 171    | Bayer (8)                 | 52     |
| Eli Lilly (3)           | 2741   | Eli Lilly (3)             | 245    | Bristol-Myers Squibb (23) | 169    | Lundbeck (64)             | 43     |
| Janssen-Cilag (10)      | 2539   | GlaxoSmithKline (4)       | 241    | Novartis (7)              | 168    | Napp Pharmaceuticals (29) | 39     |
| GlaxoSmithKline (4)     | 2531   | Janssen-Cilag (10)        | 227    | Merck Sharp & Dohme (6)   | 161    | Amgen (19)                | 36     |
| Astellas Pharma (21)    | 2410   | Sanofi Aventis (13)       | 214    | Astellas Pharma (21)      | 160    | Sanofi Aventis (13)       | 36     |
| Chiesi (27)             | 2365   | Astellas Pharma (21)      | 196    | Chiesi (27)               | 158    | Meda Pharma (46)          | 32     |
| Sanofi Aventis (13)     | 2156   | Bristol-Myers Squibb (23) | 193    | Sanofi Aventis (13)       | 156    | Eli Lilly (3)             | 27     |

## Supplementary File 8. Descriptive statistics for each recipient category

| England – categories                                            | Value (%)                   | Payments – n (%)    | Median - £ (IQR)           | Recipients – n (%)  | Drug companies     |
|-----------------------------------------------------------------|-----------------------------|---------------------|----------------------------|---------------------|--------------------|
| Public sector secondary and tertiary care providers             | <b>13,349,779.1 (25.56)</b> | <b>6660 (36.87)</b> | 233.17 (141.87 – 500)      | 260 (7.41)          | <b>89</b>          |
| Patient organisation                                            | 12,227,843.2 (23.41)        | 1141 (6.32)         | <b>4000 (500 – 11,104)</b> | 288 (8.21)          | 65                 |
| Education and research providers                                | 9,055,882.96 (17.34)        | 875 (4.84)          | 1000 (333.34 – 4,798.40)   | 56 (1.60)           | 68                 |
| Professional organisations                                      | 7,545,121.68 (14.44)        | 1776 (9.83)         | 500 (240 – 3,200)          | 354 (10.09)         | 84                 |
| Private companies other than providers of health services       | 3,975,461.63 (7.61)         | 1443 (7.99)         | 300 (196.8 – 598.92)       | 239 (6.81)          | 56                 |
| Public sector primary care providers                            | 2,416,957.98 (4.63)         | 2513 (13.91)        | 434.5 (193.6 – 869)        | <b>1809 (51.55)</b> | 32                 |
| Private sector healthcare providers                             | 1,322,785.04 (2.53)         | 463 (2.56)          | 240 (166 – 588)            | 108 (3.08)          | 44                 |
| Healthcare commissioning, planning and regulatory organisations | 1,235,239.68 (2.36)         | 2166 (11.99)        | 208.17 (160 – 307.2)       | 206 (5.87)          | 47                 |
| Charities and other third-sector organisations                  | 876,822.76 (1.68)           | 366 (2.03)          | 223.52 (157 – 487.2)       | 39 (1.11)           | 40                 |
| Formal bodies representing healthcare professionals or patients | 121,351.93 (0.23)           | 458 (2.54)          | 200 (160 – 259.8)          | 68 (1.94)           | 25                 |
| Alternative providers of health services                        | 93,534.91 (0.18)            | 180 (1.00)          | 200 (160 – 394)            | 62 (1.77)           | 28                 |
| Public administration and providers of public services          | 15,335.25 (0.03)            | 24 (0.13)           | 394.4 (224.45 – 546.67)    | 20 (0.57)           | 10                 |
| All payments                                                    | 52,445,615.48               | 18065               | 280 (160 – 827.75)         | 3509                | 100                |
| Scotland - categories                                           | Value (%)                   | Payments - n (%)    | Median - £ (IQR)           | Recipients - n (%)  | Drug companies (%) |
| Healthcare commissioning, planning and regulatory organisations | <b>878,333.57 (24.13)</b>   | <b>582 (43.30)</b>  | 240 (131.18 - 500)         | 22 (8.30)           | <b>53 (73.61)</b>  |
| Private companies other than providers of health services       | 740,694.09 (20.35)          | 25 (1.86)           | 1,200 (350 - 5,528.88)     | 11 (4.15)           | 13 (18.06)         |
| Education and research providers                                | 708,149.16 (19.46)          | 141 (10.49)         | 1152 (400 – 2,880)         | 8 (3.02)            | 41 (56.94)         |
| Patient organisation                                            | 620,384.33 (17.05)          | 52 (3.87)           | 1000 (253.68 - 9,745)      | 14 (5.28)           | 19 (26.39)         |
| Professional organisations                                      | 466,833.11 (12.83)          | 291 (21.65)         | 450 (285.67 - 980)         | 64 (24.15)          | 52 (72.22)         |

|                                                                 |                               |                         |                                 |                           |                           |
|-----------------------------------------------------------------|-------------------------------|-------------------------|---------------------------------|---------------------------|---------------------------|
| Public sector primary care providers                            | 112,308.91<br>(3.09)          | 128<br>(9.52)           | 434.5 (202.23 -<br>651,75)      | <b>113<br/>(42.64)</b>    | 13 (18.06)                |
| Private sector healthcare providers                             | 58,091.76<br>(1.60)           | 69 (5.13)               | 647.54 (206.65-<br>1,500)       | 11 (4.15)                 | 9 (12.50)                 |
| Public sector secondary and tertiary care providers             | 27,392.82<br>(0.75)           | 39 (2.90)               | 300 (189.75 -<br>612)           | 12 (4.53)                 | 11 (15.28)                |
| Charities and other third-sector organisations                  | 19,710 (0.54)                 | 4 (0.30)                | <b>1700 (377.5 -<br/>6,250)</b> | 2 (0.75)                  | 4 (5.56)                  |
| Alternative providers of health services                        | 4,580 (0.13)                  | 6 (0.45)                | 700 (360 - 1,100)               | 4 (1.51)                  | 4 (5.56)                  |
| Public administration and providers of public services          | 2,700 (0.07)                  | 5 (0.37)                | 540 (200 - 600)                 | 3 (1.13)                  | 5 (6.94)                  |
| Formal bodies representing healthcare professionals or patients | 427.2 (0.01)                  | 2 (0.15)                | 213.6 (211.4 -<br>214.8)        | 1 (0.38)                  | 1 (1.39)                  |
| All payments                                                    | 3,649,749.43                  | 1,344                   | 400 (180 - 864)                 | 265                       | 72                        |
| <b>Wales - categories</b>                                       | <b>Value (%)</b>              | <b>Payments - n (%)</b> | <b>Median - £ (IQR)</b>         | <b>Recipients - n (%)</b> | <b>Drug companies (%)</b> |
| Healthcare commissioning, planning and regulatory organisations | <b>920,980.22<br/>(46.38)</b> | <b>557<br/>(56.61)</b>  | 225 (114.24 -<br>486.39)        | 10 (4.72)                 | <b>50 (78.13)</b>         |
| Private companies other than providers of health services       | 179,495.4<br>(9.04)           | 56 (5.69)               | <b>1475 (216 -<br/>6,600)</b>   | 10 (4.72)                 | 8 (12.50)                 |
| Education and research providers                                | 179,256.38<br>(9.03)          | 37 (3.76)               | 336 (175.2 -<br>1000)           | 5 (2.36)                  | 16 (25.00)                |
| Public sector primary care providers                            | 173,268.30<br>(8.73)          | 141<br>(14.33)          | 800 (434.5 -<br>1,152)          | <b>118<br/>(55.66)</b>    | 15 (23.44)                |
| Private sector healthcare providers                             | 153,983.36<br>(7.76)          | 18 (1.83)               | 440 (360.94 -<br>1,732)         | 6 (2.83)                  | 9 (14.06)                 |
| Public administration and providers of public services          | 108,000<br>(5.44)             | 1 (0.10)                | -                               | 1 (0.47)                  | 1 (1.56)                  |
| Patient organisation                                            | 99,784.32<br>(5.03)           | 22 (2.24)               | 747.93 (500 -<br>2,000)         | 10 (4.72)                 | 11 (17.19)                |
| Public sector secondary and tertiary care providers             | 96,862.66<br>(4.88)           | 20 (2.03)               | 253.66 (200 -<br>954)           | 3 (1.42)                  | 13 (20.31)                |
| Professional organisations                                      | 64,181.82<br>(3.23)           | 88 (8.94)               | 400 (280 - 800)                 | 38 (17.92)                | 31 (48.44)                |
| Charities and other third-sector organisations                  | 5,036.8 (0.25)                | 17 (1.73)               | 120 (120 - 180)                 | 4 (1.89)                  | 7 (10.94)                 |
| Formal bodies representing healthcare professionals or patients | 4,679.37<br>(0.24)            | 27 (2.74)               | 120 (96 - 142)                  | 7 (3.30)                  | 11 (17.19)                |
| All payments                                                    | 1,987,702.62                  | 984                     | 300 (144 - 800)                 | 212                       | 64                        |



| Northern Ireland - categories                                   | Value (%)                    | Payments - n (%)      | Median - £ (IQR)                       | Recipients - n (%) | Drug companies (%) |
|-----------------------------------------------------------------|------------------------------|-----------------------|----------------------------------------|--------------------|--------------------|
| Public sector primary care providers                            | <b>184,903.09</b><br>(35.72) | <b>127</b><br>(40.97) | 600 (434.5 - 1,600)                    | <b>94</b> (60.65)  | 6 (14.29)          |
| Public sector secondary and tertiary care providers             | 111,743.45<br>(21.59)        | 83<br>(26.77)         | 288 (163.4 - 490.13)                   | 5 (3.23)           | <b>27 (64.29)</b>  |
| Professional organisations                                      | 81,489.7<br>(15.74)          | 34<br>(10.97)         | 600 (320 - 1,784)                      | 21 (13.55)         | 21 (50.00)         |
| Patient organisation                                            | 43,205.6<br>(8.35)           | 15 (4.84)             | 650 (600 - 1,450)                      | 7 (4.52)           | 14 (33.33)         |
| Education and research providers                                | 32,258 (6.23)                | 10 (3.23)             | 1100 (873.75 - 3525)                   | 1 (0.65)           | 7 (16.67)          |
| Private companies other than providers of health services       | 26,242.77<br>(5.07)          | 6 (1.94)              | <b>4179.38</b><br>(1,152.19 - 7,687.5) | 4 (2.58)           | 3 (7.14)           |
| Healthcare commissioning, planning and regulatory organisations | 22,447.6<br>(4.34)           | 7 (2.26)              | 1500 (470.8 - 4,087)                   | 4 (2.58)           | 6 (14.29)          |
| Private sector healthcare providers                             | 11,476.85<br>(2.22)          | 23 (7.42)             | 38.49 (28.9 - 485)                     | 16 (10.32)         | 6 (14.29)          |
| Formal bodies representing healthcare professionals or patients | 2,133.34<br>(0.41)           | 2 (0.65)              | 1066.67 (933.33 - 1200.00)             | 1 (0.65)           | 1 (2.38)           |
| Alternative providers of health services                        | 1,700 (0.33)                 | 3 (0.97)              | 600 (550 - 600)                        | 2 (1.29)           | 2 (4.76)           |
| All payments                                                    | 517,600.40                   | 310                   | 475.2 (217.25 - 1,357.47)              | 155                | 42                 |

Supplementary File 9. Top 10 recipients in each country

| Country  | Recipient                          | Category                                                        | Value - £    | Payments - n | Companies - n |
|----------|------------------------------------|-----------------------------------------------------------------|--------------|--------------|---------------|
| England  | King's College London              | Education and research providers                                | 2,572,086.51 | 45           | 18            |
|          | Bladder and Bowel Foundation       | Patient organisation                                            | 1,459,371.52 | 11           | 1             |
|          | London School Hyg and Tropical Med | Education and research providers                                | 935,025.98   | 16           | 6             |
|          | PeerVoice                          | Private companies other than providers of health services       | 930,028.30   | 11           | 3             |
|          | University College London          | Education and research providers                                | 907,256.40   | 96           | 36            |
|          | Diabetes UK - England              | Patient organisation                                            | 888,845.00   | 41           | 7             |
|          | Healthcare At Home                 | Private sector healthcare providers                             | 872,740.81   | 18           | 2             |
|          | Cancer Research UK                 | Patient organisation                                            | 804,543.76   | 19           | 9             |
|          | Central Manchester Univ Hosps FT   | Public sector secondary and tertiary care providers             | 739,595.97   | 108          | 37            |
|          | British Society for Rheumatology   | Professional organisations                                      | 543,012.33   | 31           | 14            |
| Scotland | Quintiles - Scotland               | Private companies other than providers of health services       | 682,601.65   | 5            | 1             |
|          | Myeloma UK                         | Patient organisation                                            | 521,574.36   | 12           | 7             |
|          | NHS Greater Glasgow and Clyde      | Healthcare commissioning, planning and regulatory organisations | 483,354.99   | 153          | 34            |
|          | University of Glasgow              | Education and research providers                                | 442,707.63   | 70           | 26            |
|          | University of Dundee               | Education and research providers                                | 160,632.40   | 20           | 11            |
|          | NHS Lothian                        | Healthcare commissioning, planning and regulatory organisations | 144,175.05   | 73           | 25            |
|          | University of Edinburgh            | Education and research providers                                | 73,014.39    | 37           | 21            |
|          | NHS Tayside                        | Healthcare commissioning, planning and regulatory organisations | 67,924.08    | 74           | 24            |
|          | NHS Ayrshire and Arran             | Healthcare commissioning, planning and regulatory organisations | 63,276.93    | 48           | 25            |
|          | Digestive Disorders Federation     | Professional organisations                                      | 60,796.00    | 2            | 2             |
| Wales    | Cardiff and Vale University HB     | Healthcare commissioning, planning and regulatory organisations | 344,131.95   | 89           | 28            |

|                  |                                                                               |                                                                 |            |     |    |
|------------------|-------------------------------------------------------------------------------|-----------------------------------------------------------------|------------|-----|----|
|                  | Abertawe Bro Morgannwg Univ HB                                                | Healthcare commissioning, planning and regulatory organisations | 242,418.82 | 124 | 32 |
|                  | LloydsPharmacy                                                                | Private sector healthcare providers                             | 146,376.00 | 4   | 1  |
|                  | University of Cardiff                                                         | Education and research providers                                | 120,822.78 | 27  | 13 |
|                  | Bluebay Medical Systems                                                       | Private companies other than providers of health services       | 116,900.00 | 26  | 1  |
|                  | Hywel Dda University HB                                                       | Healthcare commissioning, planning and regulatory organisations | 115,600.62 | 77  | 27 |
|                  | National Assembly for Wales                                                   | Public administration and providers of public services          | 108,000.00 | 1   | 1  |
|                  | Betsi Cadwaladr University HB                                                 | Healthcare commissioning, planning and regulatory organisations | 101,352.58 | 76  | 21 |
|                  | Cwm Taf University Health Board                                               | Healthcare commissioning, planning and regulatory organisations | 84,624.15  | 119 | 25 |
|                  | Velindre NHS Trust                                                            | Public sector secondary and tertiary care providers             | 80,629.32  | 18  | 13 |
| Northern Ireland | Belfast Health and SC Trust                                                   | Public sector secondary and tertiary care providers             | 60,615.65  | 30  | 17 |
|                  | Federation Of Family Practices                                                | Public sector primary care providers                            | 40,235.20  | 3   | 3  |
|                  | UK and Ireland Society of Cataract and Refractive Surgeons - Northern Ireland | Professional organisations                                      | 35,000.00  | 1   | 1  |
|                  | Queen's University Belfast                                                    | Education and research providers                                | 32,258.00  | 10  | 7  |
|                  | Northern Health and SC Trust                                                  | Public sector secondary and tertiary care providers             | 23,703.46  | 14  | 8  |
|                  | Medical Communications                                                        | Private companies other than providers of health services       | 23,250.00  | 3   | 1  |
|                  | Adult ADHD - Northern Ireland                                                 | Patient organisation                                            | 20,000.00  | 1   | 1  |
|                  | Ulster Chemists' Association                                                  | Professional organisations                                      | 16,584.00  | 4   | 3  |
|                  | Western Health and SC Trust                                                   | Public sector secondary and tertiary care providers             | 15,068.55  | 12  | 10 |
|                  | Cancer Focus Northern Ireland                                                 | Patient organisation                                            | 12,255.60  | 2   | 2  |

Supplementary File 10. Post-hoc Bonferroni pairwise comparisons between countries of payments per category

| Payment category                                    | Group 1 – Group 2*        | Test Statistic | Std. Error | Std. Test Statistic | Sig.  | Adj. Sig <sup>†,‡</sup> | Median (IQR) – group 1 - £ | Median (IQR) – group 2 - £  |
|-----------------------------------------------------|---------------------------|----------------|------------|---------------------|-------|-------------------------|----------------------------|-----------------------------|
| Alternative providers of health services            | England-Scotland          | -59.003        | 22.681     | -2.601              | 0.009 | <b>0.028</b>            | 200 (160 – 394)            | 700 (360 – 1,100)           |
|                                                     | England-Northern Ireland  | -65.919        | 31.816     | -2.072              | 0.038 | 0.115                   | 200 (160 – 394)            | 600 (550 - 600)             |
|                                                     | Scotland-Northern Ireland | 6.917          | 38.645     | 0.179               | 0.858 | 1                       | 700 (360 – 1,100)          | 600 (550 - 600)             |
| Charities and other third-sector organisations      | England-Scotland          | -118.214       | 56.132     | -2.106              | 0.035 | 0.106                   | 223.52 (157 – 487.2)       | <b>1700 (377.5 - 6,250)</b> |
|                                                     | Wales-England             | 79.844         | 27.702     | 2.882               | 0.004 | <b>0.012</b>            | 120 (120 - 180)            | 223.52 (157 – 487.2)        |
|                                                     | Wales-Scotland            | 198.059        | 62.049     | 3.192               | 0.001 | <b>0.004</b>            | 120 (120 - 180)            | <b>1700 (377.5 - 6,250)</b> |
| Education and research providers                    | England-Scotland          | -5.623         | 27.857     | -0.202              | 0.84  | 1                       | 1000 (333.34 – 4,798.40)   | 1152 (400 – 2,880)          |
|                                                     | England-Northern Ireland  | -92.61         | 97.628     | -0.949              | 0.343 | 1                       | 1000 (333.34 – 4,798.40)   | 1100 (873.75 - 3525)        |
|                                                     | Scotland-Northern Ireland | 86.987         | 100.458    | 0.866               | 0.387 | 1                       | 1152 (400 – 2,880)         | 1100 (873.75 - 3525)        |
|                                                     | Wales-England             | 204.193        | 51.523     | 3.963               | <.001 | <b>0</b>                | 336 (175.2 - 1000)         | 1000 (333.34 – 4,798.40)    |
|                                                     | Wales-Scotland            | 209.816        | 56.703     | 3.7                 | <.001 | <b>0.001</b>            | 336 (175.2 - 1000)         | 1152 (400 – 2,880)          |
|                                                     | Wales-Northern Ireland    | 296.803        | 109.409    | 2.713               | 0.007 | <b>0.04</b>             | 336 (175.2 - 1000)         | 1100 (873.75 - 3525)        |
| Formal bodies representing healthcare professionals | England-Scotland          | -46.978        | 99.854     | -0.47               | 0.638 | 1                       | 200 (160 – 259.8)          | 213.6 (211.4 - 214.8)       |
|                                                     | England-Northern Ireland  | -223.228       | 99.854     | -2.236              | 0.025 | 0.152                   | 200 (160 – 259.8)          | 1066.67 (933.33 - 1200.00)  |
|                                                     | Scotland-Northern Ireland | 176.25         | 140.907    | 1.251               | 0.211 | 1                       | 213.6 (211.4 - 214.8)      | 1066.67 (933.33 - 1200.00)  |
|                                                     | Wales-England             | 138.133        | 27.905     | 4.95                | <.001 | <b>0</b>                | 120 (96 - 142)             | 200 (160 – 259.8)           |
|                                                     | Wales-Scotland            | 185.111        | 103.261    | 1.793               | 0.073 | 0.438                   | 120 (96 - 142)             | 213.6 (211.4 - 214.8)       |

|                                                                 |                           |          |         |        |       |              |                           |                                     |
|-----------------------------------------------------------------|---------------------------|----------|---------|--------|-------|--------------|---------------------------|-------------------------------------|
|                                                                 | Wales-Northern Ireland    | 361.361  | 103.261 | 3.5    | <.001 | <b>0.003</b> | 120 (96 - 142)            | 1066.67 (933.33 - 1200.00)          |
| Healthcare commissioning, planning and regulatory organisations | England-Scotland          | -122.159 | 44.623  | -2.738 | 0.006 | <b>0.037</b> | 208.17 (160 - 307.2)      | 240 (131.18 - 500)                  |
|                                                                 | England-Northern Ireland  | -786.684 | 361.817 | -2.174 | 0.03  | 0.178        | 208.17 (160 - 307.2)      | 1500 (470.8 - 4,087)                |
|                                                                 | Scotland-Northern Ireland | 664.525  | 363.4   | 1.829  | 0.067 | 0.405        | 240 (131.18 - 500)        | 1500 (470.8 - 4,087)                |
|                                                                 | Wales-Scotland            | 94.65    | 56.651  | 1.671  | 0.095 | 0.569        | 225 (114.24 - 486.39)     | 240 (131.18 - 500)                  |
|                                                                 | Wales-Northern Ireland    | 759.175  | 363.497 | 2.089  | 0.037 | 0.22         | 225 (114.24 - 486.39)     | 1500 (470.8 - 4,087)                |
|                                                                 | England-Wales             | -27.51   | 45.405  | -0.606 | 0.545 | 1            | 208.17 (160 - 307.2)      | 225 (114.24 - 486.39)               |
| Patient organisation                                            | Wales-England             | 144.727  | 77.321  | 1.872  | 0.061 | 0.367        | 747.93 (500 - 2,000)      | <b>4000 (500 - 11,104)</b>          |
|                                                                 | Wales-Scotland            | 29.422   | 91.028  | 0.323  | 0.747 | 1            | 747.93 (500 - 2,000)      | 1000 (253.68 - 9,745)               |
|                                                                 | Northern Ireland-Wales    | -8.633   | 118.686 | -0.073 | 0.942 | 1            | 650 (600 - 1,450)         | 747.93 (500 - 2,000)                |
|                                                                 | Northern Ireland-Scotland | -38.055  | 103.121 | -0.369 | 0.712 | 1            | 650 (600 - 1,450)         | 1000 (253.68 - 9,745)               |
|                                                                 | Northern Ireland-England  | 153.361  | 91.248  | 1.681  | 0.093 | 0.557        | 650 (600 - 1,450)         | <b>4000 (500 - 11,104)</b>          |
|                                                                 | Scotland-England          | 115.306  | 50.259  | 2.294  | 0.022 | 0.131        | 1000 (253.68 - 9,745)     | <b>4000 (500 - 11,104)</b>          |
| Private companies other than providers of health services       | England-Scotland          | -317.041 | 89.112  | -3.558 | <.001 | <b>0.002</b> | 300 (196.8 - 598.92)      | 1,200 (350 - 5,528.88)              |
|                                                                 | England-Northern Ireland  | -527.308 | 180.717 | -2.918 | 0.004 | <b>0.021</b> | 300 (196.8 - 598.92)      | <b>4179.38 (1,152.19 - 7,687.5)</b> |
|                                                                 | Scotland-Northern Ireland | 210.267  | 200.821 | 1.047  | 0.295 | 1            | 1,200 (350 - 5,528.88)    | <b>4179.38 (1,152.19 - 7,687.5)</b> |
|                                                                 | Wales-Scotland            | 115.061  | 106.256 | 1.083  | 0.279 | 1            | <b>1475 (216 - 6,600)</b> | 1,200 (350 - 5,528.88)              |
|                                                                 | Wales-Northern Ireland    | 325.327  | 189.758 | 1.714  | 0.086 | 0.519        | <b>1475 (216 - 6,600)</b> | <b>4179.38 (1,152.19 - 7,687.5)</b> |

|                                      |                           |          |         |        |       |              |                         |                           |
|--------------------------------------|---------------------------|----------|---------|--------|-------|--------------|-------------------------|---------------------------|
|                                      | England-Wales             | -201.98  | 60.166  | -3.357 | <.001 | <b>0.005</b> | 300 (196.8 – 598.92)    | <b>1475 (216 – 6,600)</b> |
| Private sector healthcare providers  | England-Scotland          | -64.982  | 21.355  | -3.043 | 0.002 | <b>0.014</b> | 240 (166 – 588)         | 647.54 (206.65 – 1,500)   |
|                                      | England-Wales             | -88.107  | 39.755  | -2.216 | 0.027 | 0.16         | 240 (166 – 588)         | 440 (360.94 – 1,732)      |
|                                      | Northern Ireland-Wales    | -206.778 | 52.076  | -3.971 | <.001 | <b>0</b>     | 38.49 (28.9 – 485)      | 440 (360.94 – 1,732)      |
|                                      | Northern Ireland-Scotland | -183.652 | 39.843  | -4.609 | <.001 | <b>0</b>     | 38.49 (28.9 – 485)      | 647.54 (206.65 – 1,500)   |
|                                      | Northern Ireland-England  | 118.671  | 35.352  | 3.357  | <.001 | <b>0.005</b> | 38.49 (28.9 – 485)      | 240 (166 – 588)           |
|                                      | Scotland-wales            | -23.126  | 43.797  | -0.528 | 0.597 | 1            | 647.54 (206.65 – 1,500) | 440 (360.94 – 1,732)      |
| Professional organisations           | England-Northern Ireland  | -35.169  | 109.4   | -0.321 | 0.748 | 1            | 500 (240 – 3,200)       | 600 (320 – 1,784)         |
|                                      | Scotland-Northern Ireland | 157.615  | 114.524 | 1.376  | 0.169 | 1            | 450 (285.67 – 980)      | 600 (320 – 1,784)         |
|                                      | Wales-England             | 182.447  | 69.008  | 2.644  | 0.008 | <b>0.049</b> | 400 (280 – 800)         | 500 (240 – 3,200)         |
|                                      | Wales-Scotland            | 60.001   | 76.873  | 0.781  | 0.435 | 1            | 400 (280 – 800)         | 450 (285.67 – 980)        |
|                                      | Wales-Northern Ireland    | 217.616  | 127.597 | 1.705  | 0.088 | 0.529        | 400 (280 – 800)         | 600 (320 – 1,784)         |
|                                      | Scotland-England          | 122.446  | 39.962  | 3.064  | 0.002 | <b>0.013</b> | 450 (285.67 – 980)      | 500 (240 – 3,200)         |
| Public sector primary care providers | England-Northern Ireland  | -355.779 | 76.292  | -4.663 | <.001 | <b>0</b>     | 434.5 (193.6 – 869)     | 600 (434.5 – 1,600)       |
|                                      | Scotland-Northern Ireland | 407.76   | 105.06  | 3.881  | <.001 | <b>0.001</b> | 434.5 (202.23 – 651,75) | 600 (434.5 – 1,600)       |
|                                      | England-Wales             | -459.79  | 72.597  | -6.333 | <.001 | <b>0</b>     | 434.5 (193.6 – 869)     | 800 (434.5 – 1,152)       |
|                                      | Northern Ireland-Wales    | -104.011 | 102.62  | -1.014 | 0.311 | 1            | 600 (434.5 – 1,600)     | 800 (434.5 – 1,152)       |
|                                      | Scotland-England          | 51.98    | 76.008  | 0.684  | 0.494 | 1            | 434.5 (202.23 – 651,75) | 434.5 (193.6 – 869)       |
|                                      | Scotland-wales            | -511.771 | 102.409 | -4.997 | <.001 | <b>0</b>     | 434.5 (202.23 – 651,75) | 800 (434.5 – 1,152)       |

\*Each row tests the null hypothesis that the Sample 1 and Sample 2 distributions are the same.

†Asymptotic significances (2-sided tests) are displayed. The significance level is .050.

‡Significance values have been adjusted by the Bonferroni correction for multiple tests

Supplementary File 11. Post-hoc Bonferroni pairwise comparisons between countries of payment types

| Payment Type                    | Group 1 – Group 2* | Test Statistic | Std. Error | Std. Test Statistic | Sig.  | Adj. Sig <sup>†,‡</sup> | Median (IQR) – group 1 - £ | Median (IQR) – group 2 - £ |
|---------------------------------|--------------------|----------------|------------|---------------------|-------|-------------------------|----------------------------|----------------------------|
| Contribution to costs of Events | Wales-England      | 498.254        | 159.743    | 3.119               | 0.002 | 0.011                   | 223.36 (120 - 400)         | 240 (155.95 - 400)         |
|                                 | Wales-Scotland     | 1449.82        | 208.45     | 6.955               | <.001 | 0                       | 223.36 (120 - 400)         | 300 (160 - 600)            |
|                                 | Wales-Northern     | 2690.485       | 402.839    | 6.679               | <.001 | 0                       | 223.36 (120 - 400)         | 477.6 (200 - 1,147.6)      |
|                                 | England-Scotland   | -951.566       | 143.605    | -6.626              | <.001 | 0                       | 240 (155.95 - 400)         | 300 (160 - 600)            |
|                                 | England-Northern   | -2192.23       | 373.43     | -5.871              | <.001 | 0                       | 240 (155.95 - 400)         | 477.6 (200 - 1,147.6)      |
|                                 | Scotland-Northern  | 1240.664       | 396.716    | 3.127               | 0.002 | 0.011                   | 300 (160 - 600)            | 477.6 (200 - 1,147.6)      |
| Donations and Grants            | Wales-England      | 25.151         | 94.77      | 0.265               | 0.791 | 1                       | 800 (434.5 - 2,200)        | 959.98 (256 - 4,800)       |
|                                 | Northern-Scotland  | -140.935       | 137.745    | -1.023              | 0.306 | 1                       | 434.5 (217.5 - 1,867.5)    | 651.75 (217.25 - 2,578)    |
|                                 | Northern-Wales     | -451.347       | 142.863    | -3.159              | 0.002 | 0.009                   | 434.5 (217.5 - 1,867.5)    | 800 (434.5 - 2,200)        |
|                                 | Northern-England   | 476.498        | 111.315    | 4.281               | <.001 | 0                       | 434.5 (217.5 - 1,867.5)    | 959.98 (256 - 4,800)       |
|                                 | Scotland-Wales     | -310.412       | 124.755    | -2.488              | 0.013 | 0.077                   | 651.75 (217.25 - 2,578)    | 800 (434.5 - 2,200)        |
|                                 | Scotland-England   | 335.563        | 86.862     | 3.863               | <.001 | 0.001                   | 651.75 (217.25 - 2,578)    | 959.98 (256 - 4,800)       |

\*Each row tests the null hypothesis that the Sample 1 and Sample 2 distributions are the same.

<sup>†</sup>Asymptotic significances (2-sided tests) are displayed. The significance level is .050.

<sup>‡</sup>Significance values have been adjusted by the Bonferroni correction for multiple tests.

STROBE Statement—Checklist of items that should be included in reports of *cross-sectional studies*

|                              | Item No | Recommendation                                                                                                                                                                                    | Page No                             |
|------------------------------|---------|---------------------------------------------------------------------------------------------------------------------------------------------------------------------------------------------------|-------------------------------------|
| <b>Title and abstract</b>    | 1       | (a) Indicate the study's design with a commonly used term in the title or the abstract                                                                                                            | 2                                   |
|                              |         | (b) Provide in the abstract an informative and balanced summary of what was done and what was found                                                                                               | 2                                   |
| <b>Introduction</b>          |         |                                                                                                                                                                                                   |                                     |
| Background/rationale         | 2       | Explain the scientific background and rationale for the investigation being reported                                                                                                              | 3-4                                 |
| Objectives                   | 3       | State specific objectives, including any prespecified hypotheses                                                                                                                                  | 4                                   |
| <b>Methods</b>               |         |                                                                                                                                                                                                   |                                     |
| Study design                 | 4       | Present key elements of study design early in the paper                                                                                                                                           | 5                                   |
| Setting                      | 5       | Describe the setting, locations, and relevant dates, including periods of recruitment, exposure, follow-up, and data collection                                                                   | 5                                   |
| Participants                 | 6       | (a) Give the eligibility criteria, and the sources and methods of selection of participants                                                                                                       | 5                                   |
| Variables                    | 7       | Clearly define all outcomes, exposures, predictors, potential confounders, and effect modifiers. Give diagnostic criteria, if applicable                                                          | 5-6                                 |
| Data sources/<br>measurement | 8*      | For each variable of interest, give sources of data and details of methods of assessment (measurement). Describe comparability of assessment methods if there is more than one group              | 5-6                                 |
| Bias                         | 9       | Describe any efforts to address potential sources of bias                                                                                                                                         | n/a                                 |
| Study size                   | 10      | Explain how the study size was arrived at                                                                                                                                                         | N/a                                 |
| Quantitative variables       | 11      | Explain how quantitative variables were handled in the analyses. If applicable, describe which groupings were chosen and why                                                                      | 5                                   |
| Statistical methods          | 12      | (a) Describe all statistical methods, including those used to control for confounding                                                                                                             | 5                                   |
|                              |         | (b) Describe any methods used to examine subgroups and interactions                                                                                                                               | n/a                                 |
|                              |         | (c) Explain how missing data were addressed                                                                                                                                                       | n/a                                 |
|                              |         | (d) If applicable, describe analytical methods taking account of sampling strategy                                                                                                                | n/a                                 |
|                              |         | (e) Describe any sensitivity analyses                                                                                                                                                             | n/a                                 |
| <b>Results</b>               |         |                                                                                                                                                                                                   |                                     |
| Participants                 | 13*     | (a) Report numbers of individuals at each stage of study—eg numbers potentially eligible, examined for eligibility, confirmed eligible, included in the study, completing follow-up, and analysed | Supplementary File 4 (flow diagram) |
|                              |         | (b) Give reasons for non-participation at each stage                                                                                                                                              | n/a                                 |
|                              |         | (c) Consider use of a flow diagram                                                                                                                                                                | Supplementary File 4                |



|                          |     |                                                                                                                                                                                                              |       |
|--------------------------|-----|--------------------------------------------------------------------------------------------------------------------------------------------------------------------------------------------------------------|-------|
| Descriptive data         | 14* | (a) Give characteristics of study participants (eg demographic, clinical, social) and information on exposures and potential confounders                                                                     | n/a   |
|                          |     | (b) Indicate number of participants with missing data for each variable of interest                                                                                                                          | n/a   |
| Outcome data             | 15* | Report numbers of outcome events or summary measures                                                                                                                                                         | 6     |
| Main results             | 16  | (a) Give unadjusted estimates and, if applicable, confounder-adjusted estimates and their precision (eg, 95% confidence interval). Make clear which confounders were adjusted for and why they were included | n/a   |
|                          |     | (b) Report category boundaries when continuous variables were categorized                                                                                                                                    | n/a   |
|                          |     | (c) If relevant, consider translating estimates of relative risk into absolute risk for a meaningful time period                                                                                             | n/a   |
| Other analyses           | 17  | Report other analyses done—eg analyses of subgroups and interactions, and sensitivity analyses                                                                                                               | n/a   |
| <b>Discussion</b>        |     |                                                                                                                                                                                                              |       |
| Key results              | 18  | Summarise key results with reference to study objectives                                                                                                                                                     | 11-13 |
| Limitations              | 19  | Discuss limitations of the study, taking into account sources of potential bias or imprecision. Discuss both direction and magnitude of any potential bias                                                   | 13    |
| Interpretation           | 20  | Give a cautious overall interpretation of results considering objectives, limitations, multiplicity of analyses, results from similar studies, and other relevant evidence                                   | 11-14 |
| Generalisability         | 21  | Discuss the generalisability (external validity) of the study results                                                                                                                                        | 11-14 |
| <b>Other information</b> |     |                                                                                                                                                                                                              |       |
| Funding                  | 22  | Give the source of funding and the role of the funders for the present study and, if applicable, for the original study on which the present article is based                                                | 1     |

\*Give information separately for exposed and unexposed groups.

**Note:** An Explanation and Elaboration article discusses each checklist item and gives methodological background and published examples of transparent reporting. The STROBE checklist is best used in conjunction with this article (freely available on the Web sites of PLoS Medicine at <http://www.plosmedicine.org/>, Annals of Internal Medicine at <http://www.annals.org/>, and Epidemiology at <http://www.epidem.com/>). Information on the STROBE Initiative is available at [www.strobe-statement.org](http://www.strobe-statement.org).

# BMJ Open

## Comparing pharmaceutical company payments in the four UK countries: a cross-sectional and social network analysis

|                                 |                                                                                                                                                                                                                                               |
|---------------------------------|-----------------------------------------------------------------------------------------------------------------------------------------------------------------------------------------------------------------------------------------------|
| Journal:                        | <i>BMJ Open</i>                                                                                                                                                                                                                               |
| Manuscript ID                   | bmjopen-2022-061591.R1                                                                                                                                                                                                                        |
| Article Type:                   | Original research                                                                                                                                                                                                                             |
| Date Submitted by the Author:   | 16-Jan-2023                                                                                                                                                                                                                                   |
| Complete List of Authors:       | Rickard, Emily; University of Bath, Department of Social and Policy Sciences<br>Carmel, Emma; University of Bath, Department of Social and Policy Sciences<br>Ozieranski, Piotr; University of Bath, Department of Social and Policy Sciences |
| <b>Primary Subject Heading</b>: | Health policy                                                                                                                                                                                                                                 |
| Secondary Subject Heading:      | Public health                                                                                                                                                                                                                                 |
| Keywords:                       | Health policy < HEALTH SERVICES ADMINISTRATION & MANAGEMENT, MEDICAL ETHICS, PUBLIC HEALTH                                                                                                                                                    |
|                                 |                                                                                                                                                                                                                                               |

SCHOLARONE™  
Manuscripts



I, the Submitting Author has the right to grant and does grant on behalf of all authors of the Work (as defined in the below author licence), an exclusive licence and/or a non-exclusive licence for contributions from authors who are: i) UK Crown employees; ii) where BMJ has agreed a CC-BY licence shall apply, and/or iii) in accordance with the terms applicable for US Federal Government officers or employees acting as part of their official duties; on a worldwide, perpetual, irrevocable, royalty-free basis to BMJ Publishing Group Ltd ("BMJ") its licensees and where the relevant Journal is co-owned by BMJ to the co-owners of the Journal, to publish the Work in this journal and any other BMJ products and to exploit all rights, as set out in our [licence](#).

The Submitting Author accepts and understands that any supply made under these terms is made by BMJ to the Submitting Author unless you are acting as an employee on behalf of your employer or a postgraduate student of an affiliated institution which is paying any applicable article publishing charge ("APC") for Open Access articles. Where the Submitting Author wishes to make the Work available on an Open Access basis (and intends to pay the relevant APC), the terms of reuse of such Open Access shall be governed by a Creative Commons licence – details of these licences and which [Creative Commons](#) licence will apply to this Work are set out in our licence referred to above.

Other than as permitted in any relevant BMJ Author's Self Archiving Policies, I confirm this Work has not been accepted for publication elsewhere, is not being considered for publication elsewhere and does not duplicate material already published. I confirm all authors consent to publication of this Work and authorise the granting of this licence.

# 1 Comparing pharmaceutical company payments in the four UK 2 countries: a cross-sectional and social network analysis

3  
4  
5  
6  
7  
8 Emily Rickard

9 Department of Social and Policy Sciences, University of Bath, Bath, United Kingdom.

10 Email: [e.j.rickard@bath.ac.uk](mailto:e.j.rickard@bath.ac.uk)

11  
12  
13 Emma Carmel

14 Department of Social and Policy Sciences, University of Bath, Bath, United Kingdom.

15 Email: [e.k.carmel@bath.ac.uk](mailto:e.k.carmel@bath.ac.uk)

16  
17  
18 Piotr Ozieranski (Corresponding Author)

19 Department of Social and Policy Sciences, University of Bath, Bath, United Kingdom.

20 Email: [p.ozieranski@bath.ac.uk](mailto:p.ozieranski@bath.ac.uk)

21  
22  
23 Word count: 4921

## 24 25 26 **Key words**

27 Transparency, financial disclosures, pharmaceutical industry, health policy, conflicts of  
28 interest  
29

## 30 31 **ABSTRACT**

32  
33  
34 **Objectives** To examine the characteristics of pharmaceutical payments to healthcare and  
35 patient organisations in the four UK countries. Compare companies spending the most;  
36 types of organisations; and types of payments in the four countries. Measure the extent to  
37 which companies target payments at the same recipients in each country and whether it  
38 differs depending on the type of recipient.  
39

40  
41 **Design** Cross-sectional comparative and social network analysis.

42  
43 **Setting** England, Scotland, Wales, Northern Ireland.

44  
45  
46 **Participants** 100 donors (pharmaceutical companies) reporting payments to 4,229 recipients  
47 (healthcare organisations and patient organisations) in 2015.  
48

49  
50  
51 **Main outcome measures** Number of payments incorrectly reported in Disclosure UK and  
52 payments reported twice in two places –Disclosure UK and company websites. For each  
53 country: payment totals and distribution; average number of common recipients between  
54 companies; share of payments to organisations fulfilling different roles in the health  
55 ecosystem; and payments for different activities.  
56

57  
58  
59 **Results** We found evidence of reporting errors in Disclosure UK. Companies prioritised  
46 different types of recipient and different types of activity in each country. There were  
significant differences in the distribution of payments across the four countries, even for

1  
2  
3 1 similar types of recipients. Recipients in England and Wales received smaller individual  
4 2 payments than in Scotland and Northern Ireland. Overall, targeting shared recipients  
5 3 occurred most frequently in England, but was also common in certain pockets of each  
6 4 country's health ecosystem.  
7 5

8 6  
9 7 **Conclusions** Our findings suggest a strategic approach to payments tailored to countries'  
10 8 policy and decision-making context, indicating there may be specific vulnerabilities to  
11 9 potential financial conflicts of interest at sub-national level. Payment differences between  
12 10 countries may be occurring in other countries, particularly those with decentralised health  
13 11 systems and/or high levels of independence across its decision-making authorities. We call  
14 12 for a single database containing all recipient types, full location details, and published with  
15 13 associated descriptive and network statistics.  
16 14  
17 15

### 16 15 **STRENGTHS AND LIMITATIONS OF THIS STUDY**

- 17 16 • This is the first study to compare pharmaceutical industry payments in England,  
18 17 Scotland, Wales and Northern Ireland
- 19 18 • Our analysis created a new database combining payments disclosed in Disclosure UK  
20 19 with individual company disclosures of payments to patient organisations
- 21 20 • We use social network analysis to facilitate a systematic sub-national comparison of  
22 21 payments
- 23 22 • One key limitation is that the data is from 2015 and is not able to assess trends in  
24 23 payment types or amounts.  
25 24  
26 25  
27 26  
28 27  
29 28  
30 29  
31 30  
32 31  
33 32  
34 33  
35 34  
36 35  
37 36  
38 37  
39 38  
40 39  
41 40  
42 41  
43 42  
44 43  
45 44  
46 45  
47 46  
48 47  
49 48  
50 49  
51 50  
52 51  
53 52  
54 53  
55 54  
56 55  
57 56  
58 57  
59 58  
60 59  
61 60

## 1 INTRODUCTION

2 Some of the major pharmaceutical companies spend more on marketing than on the  
3 development of products<sup>1 2 3</sup>. Industry marketing efforts include payments to physicians,  
4 which are seen to boost innovation and efficiency in healthcare<sup>4</sup> but also generate concerns  
5 about potential *individual* financial conflicts of interest (COIs), influencing prescribing  
6 choices<sup>5</sup> and leading to patient harms<sup>6</sup>. Payments to healthcare and patient organisations  
7 have also been seen to generate potential *institutional* financial COIs around policy and  
8 programme decision-making. An institution's primary goals *may* be unduly influenced by a  
9 secondary interest<sup>7</sup>, which can be more damaging than individual COIs<sup>7-9</sup>. COIs are defined  
10 in terms of the *risk* of undue influence and not actual bias or misconduct<sup>9</sup>, but institutional  
11 COIs have been linked to increased prescriptions of drugs with unproven safety<sup>8</sup>, distorting  
12 research agendas<sup>10</sup>, threatening the objectivity of professional education<sup>7</sup>, and  
13 compromising independence<sup>11</sup>. These observations have highlighted what has been called  
14 the pharmaceutical industry's 'web of influence', in which companies "sustain large  
15 networks to gather, create, control and disseminate information"<sup>12</sup>.

16  
17 The potential to distort public health research and policy to favour commercial interests  
18 above patients' has led to increased policy scrutiny<sup>13 14</sup>, including the introduction of self-  
19 regulatory payment disclosure requirements for pharmaceutical companies in Europe<sup>15</sup>.  
20 Such measures are intended to aid transparency, reducing potential conflicts of interest and  
21 undue influence on clinical and policy decisions. This article combines and analyses  
22 disclosure data to better understand the depth, breadth, and structure of industry  
23 payments and compares them in the four countries of the UK. Comparative analysis can  
24 illustrate novel ethical and governance problems<sup>16</sup> or reveal that recognised problems are  
25 common across countries<sup>17</sup>, which our systematic examination of the extent and diversity of  
26 payments reported by pharmaceutical companies explores.

### 27 *Disclosure of industry payments*

28 In the United States, pharmaceutical industry disclosures of payments to physicians and  
29 teaching hospitals were made mandatory in 2013<sup>18</sup>, and subsequent research has examined  
30 payments to physicians<sup>19-30</sup>, with institutional payments to hospitals largely ignored<sup>31</sup>.  
31 Payments to patient organisations, defined as not-for-profit institutions that primarily  
32 represent the needs of patients and/or caregivers<sup>32</sup>, have been seldom explored in the US<sup>33</sup>  
33 <sup>34</sup> as their disclosure is not regulated by the state or industry.

34  
35  
36 The prevalence of self-regulation in Europe is associated with very different disclosure rules  
37 to the US<sup>35 36</sup>. Since 2012, the European trade association, the European Federation of  
38 Pharmaceutical Industries and Associations (EFPIA), has mandated that pharmaceutical  
39 companies publish annual disclosures of their payments to patient organisations on their  
40 websites<sup>37</sup>. Subsequent studies revealed extensive funding in the UK<sup>38 39</sup> and the Nordic  
41 countries<sup>40 41</sup>. However, transparency remains limited by a lack of standardised reporting  
42 requirements and limited oversight<sup>42</sup> which are associated with payment under-reporting by  
43 both donors and recipients<sup>39</sup>.

44  
45 In separate self-regulatory arrangements<sup>43</sup>, disclosures of payments to healthcare  
46 organisations, defined by the industry as healthcare, medical or scientific associations or  
47 organisations such as hospitals, clinics, foundations or universities<sup>44</sup>, have been mandated

1 since 2015. In the UK, these are reported annually in a centralised database, Disclosure UK,  
2 hosted by the industry trade body, the Association for the British Pharmaceutical Industry  
3 (ABPI). Most research attention has been on the poor accessibility and quality of the data<sup>35</sup>,  
4 noting lack of standardisation of recipients<sup>4 25</sup> and inadequate details about individual  
5 payments' purpose<sup>4</sup>. These make tracking and analysing the payments complicated and  
6 time-consuming, hindering the principle aim of improving transparency.

7  
8 Our study is the first, to our knowledge, to systematically combine industry data on  
9 payments to healthcare organisations and patient organisations as the self-regulatory codes  
10 allow them to be reported separately. Analysing them together enables us to better assess  
11 the breadth and depth of the 'web of influence', and gain insight into potential  
12 reinforcement effects of payments to multiple and diverse organisations that have separate  
13 yet overlapping interests, including providing patient care and support<sup>31 38</sup>, involvement in  
14 policy-making<sup>13 45 46</sup>, and conducting clinical research<sup>9 38</sup>.

### 15 *Regional differences in industry payments*

16 Another aspect of the industry's web of influence largely unexplored in Europe is whether  
17 and how it is structured around regional differences in payments. Little is known about  
18 strategic targeting of particular fields of healthcare provision and/or decision-making, nor  
19 about possible effects on potential COIs in regional policy-making. Regionally targeted  
20 payments may have direct policy effects 'upstream', such as commissioning (the planning,  
21 prioritising, and purchasing of public health services)<sup>47</sup>; and 'downstream', such as bearing  
22 greater influence on organisational priorities and day-to-day practices.

23  
24 Emerging US research has found significant differences in the distribution of payments  
25 between states<sup>20 48-50</sup>, including by state size<sup>51</sup> and political composition<sup>52</sup>, indicating that  
26 demographics and the organisation and regulation of healthcare matter. The first regional  
27 analysis in Europe revealed differences in the total value and type of payments prioritised in  
28 eight countries<sup>17</sup>. Most recently a UK study found headquarter distance from country  
29 capitals predicts patient organisations' dependence on pharmaceutical company funding<sup>53</sup>.  
30 To date, research has not considered the locations of patient and healthcare organisations  
31 as the reporting requirements do not extend to disclosing country locations<sup>17 25 28</sup>.

32  
33  
34 However, the UK presents a crucial case for this type of analysis given its importance as a  
35 pharmaceutical market<sup>54</sup>, large value of payments compared to other European countries<sup>17</sup>  
36 and vast charitable sector comprising many potential recipients<sup>55</sup>. England, Scotland, Wales  
37 and Northern Ireland have four distinct health systems, with substantial autonomy to  
38 determine health policies and services<sup>56-58</sup>. They also differ demographically – population  
39 size is largest in England and smallest in Northern Ireland<sup>59</sup> and health outcomes are highest  
40 in England and lowest in Scotland<sup>60</sup>. The demographic and health system differences could  
41 be associated with how industry engages with different healthcare sectors.

42  
43 We know that pharmaceutical companies prioritise payments to different types of  
44 healthcare organisations in the UK<sup>25 28</sup>, however commercially patterned inequalities,  
45 including dominant funders or types of recipients, may be more pronounced sub-nationally  
46 in the in the smallest UK countries yet hidden by UK-level analysis to date<sup>16</sup>. Studies have  
47 started recognising the country distinction, focusing on payments to healthcare

1 organisations in England<sup>47 61</sup>, but cross-country comparisons have not yet been conducted.  
2 Comparative insights could also help understand whether similar patterns are occurring in  
3 other European countries with highly decentralised healthcare set-ups, including Germany<sup>62</sup>  
4 and Spain<sup>63</sup>.

5  
6 In this article, we apply social network analysis (SNA) which offers new insights into industry  
7 marketing tactics<sup>64 65 61</sup>. SNA can reveal areas of the healthcare ecosystem where  
8 connections between companies, measured by the number of payment recipients  
9 companies have in common, are most prevalent. Prevalent connections may highlight  
10 industry marketing efforts in pockets of each of the UK's health systems, including indicating  
11 areas of *competition* between companies<sup>66 67 68</sup> and revealing areas where companies are  
12 seeking to enhance their visibility<sup>61 69</sup>.

13  
14 We integrate and analyse data from Disclosure UK and disclosures of payments to patient  
15 organisations to examine patterns in pharmaceutical company payments to organisations in  
16 the UK healthcare ecosystem. Specifically, our objectives are to:

- 17  
18 • examine the characteristics of payments to healthcare and patient organisations in  
19 the four countries
- 20 • compare the top donors financially in each country
- 21 • identify similarities and differences in the types of payments and in the types of  
22 organisations receiving payments in the four countries
- 23 • measure the extent to which companies target payments at the same recipients in  
24 each country and whether it differs depending on the type of recipient.

## 25 26 **METHODS**

### 27 28 **Data sources**

29 Our primary data sources are publicly available pharmaceutical industry transparency  
30 disclosures from 2015. Corresponding to relevant ABPI<sup>70</sup> and EFPIA Codes<sup>37</sup>, pharmaceutical  
31 companies disclose payments to healthcare organisations and to patient organisations  
32 separately.

33  
34 Payments to healthcare organisations are disclosed in a centralised database, Disclosure UK,  
35 published annually by the ABPI. Payments are disclosed with recipient name, payment type  
36 (donations and grants, costs of events, joint working, and consultancy – see Supplementary  
37 File 1) and value, and address information. We use the 2015 version of Disclosure UK and  
38 focus on non-R&D payments to healthcare organisations (R&D payments are reported as  
39 one lump sum per company without named recipients<sup>25 43</sup>).

40  
41 Payments to patient organisations are only available on individual pharmaceutical company  
42 websites and are usually presented as a PDF file and include recipient name, payment  
43 description, and payment value<sup>42</sup>. We extracted the payments to patient organisations data  
44 into a single database, standardising names and identifying headquarter addresses as part  
45 of another project<sup>38</sup>. We detail our approach to data cleaning these data elsewhere<sup>25 38</sup>.



## 1 Dataset preparation and integration

2 We followed several steps to prepare the Disclosure UK and patient organisation datasets  
3 for analysis. First, we merged the two datasets (see Supplementary File 2 for data  
4 integration flowchart). Second, as Disclosure UK provides incomplete addresses, we  
5 conducted independent web searches on each payment recipient to determine which UK  
6 country they are based. We used the same methodology to determine patient  
7 organisations' locations. Third, we excluded payments to patient organisations duplicated in  
8 the two datasets and identified patient organisations incorrectly reported as healthcare  
9 organisations in Disclosure UK. Fourth, we coded the patient organisation descriptions to  
10 match the codes used by Disclosure UK (Supplementary File 1).

11  
12 Fifth, as part of a previous study<sup>25</sup> we standardised recipient names for almost 20,000  
13 payment entries and inductively categorised them based on their function within the  
14 healthcare system (e.g. service provider) and their sector (e.g. public or private) (see  
15 Supplementary File 3 for comprehensive definitions and examples of organisations). For the  
16 current study we introduced patient organisations. Recipient types (with the most  
17 frequently occurring example) included in our analysis are:

### 18 *Providers of health services*

- 19 • Alternative providers of health services (e.g. community interest companies  
20 providing health services)
- 21 • Healthcare commissioning, planning and regulatory organisations (e.g. clinical  
22 commissioning groups)
- 23 • Private sector healthcare providers (e.g. private healthcare groups)
- 24 • Public sector primary care providers (e.g. GP surgeries)
- 25 • Public sector secondary and tertiary care providers (e.g. NHS trusts)

### 26 *Representative organisations*

- 27 • Formal bodies representing healthcare professionals or patients (e.g. local medical  
28 committees)
- 29 • Patient organisations (e.g. multipurpose patient organisations)
- 30 • Professional organisations (e.g. multi-professional or multi-stakeholder  
31 organisations)

### 32 *Other organisations*

- 33 • Charities and other third-sector organisations (excludes providers of health services,  
34 professional organisations, and patient organisations) (e.g. charitable trusts  
35 providing educational events for healthcare professionals)
- 36 • Education and research providers (e.g. universities)
- 37 • Private companies other than providers of health services (e.g. providers of medical  
38 communications or training services)
- 39 • Public administration and providers of public services (e.g. local authorities)
- 40 • Recipients unclear (when no information could be found)

## 41 **Analysis**

42 We calculated the total and median value of payments in each country and recipient type.  
43 The Shapiro-Wilks test of normalcy found the data to be non-normal in each country,  
44  
45  
46  
47

1 therefore non-parametric Kruskal-Wallis tests (adjusted for ties) were used to check for  
2 between-country differences in the distribution of payments overall and in the different  
3 recipient types. Dunn's post-hoc pairwise analyses (with Bonferroni's correction for multiple  
4 comparisons) were conducted to identify where differences were present between  
5 countries and recipient types. Kruskal-Wallis and Dunn's tests do not assume equal sample  
6 sizes<sup>71</sup> and have been conducted on similar industry disclosure data<sup>72 73 74</sup>. Statistical  
7 significance was set at  $p = \leq .05$ .

8  
9 SNA was used to measure the number payment recipients that were common between  
10 pairs of pharmaceutical companies (density) and across all companies (degree centrality).  
11 Density measures the overall level of connection in a network and can be used to compare  
12 the structure of different groups<sup>75</sup>. It produces two outputs – average value (average  
13 number of recipients each pair of companies shares<sup>76</sup>) and average weighted degree  
14 (average of the total number recipients each company shares with other companies). The  
15 higher these values, the more frequently a multiple companies target the same recipients in  
16 a given network<sup>77</sup>. For example, a density score of 1.194 tells us that all pairs of companies  
17 in the network funded an average of 1.2 recipients in common. Degree centrality, on the  
18 other hand, provides a score for each individual company based on the number of recipients  
19 in common it shares with other companies in the network – the higher the score, the more  
20 recipients a company shares<sup>75 78</sup>. For example, if a company has a degree centrality score of  
21 320, they funded the same recipient as another company 320 times.

22  
23 We compare the number of common recipients companies have in each country overall and  
24 when targeting different recipient types in each country. SNA requires data to be structured  
25 as a matrix, therefore we transformed the payment data into a series of matrices of  
26 pharmaceutical companies with ties based on the number of recipients each company  
27 shared with other companies in each country and recipient type. To identify which  
28 companies targeted the same recipients, each matrix consisted only of the companies  
29 making at least one payment (regardless of whether or not they shared any recipients). We  
30 conducted separate network analyses on each of the four countries as the findings would  
31 otherwise be highly influenced by England's data as the largest network.

32  
33 Data was processed in Microsoft Excel. The dataset underpinning our analysis is published in  
34 the Bath Research Data Archive<sup>79</sup>. We analysed the data descriptively in SPSS version 27  
35 (IBM) and Microsoft Excel. We conducted social network analysis in UCINET version 6<sup>77</sup>.  
36 Country networks were visualised in Gephi version 0.9.2.

## 37 38 **Outcome measures**

### 39 40 *Disclosure accuracy*

41 First, we measured the number of patient organisations, alongside the number and value of  
42 payments, that were incorrectly disclosed as healthcare organisations in Disclosure UK.

### 43 44 *Breadth of payments in each country*

45 Second, we explored the payment characteristics in each country. We measured the total  
46 and median values and the number of: payments, recipients, and companies. We adjusted

1  
2  
3 1 the total value by population size for comparison. We also compared the distribution of  
4 2 payments between each country using Kruskal-Wallis tests.  
5 3

6 4 Third, we identified the top 10% of companies making payments in each country and  
7 5 compared the payment strategies of the companies paying the most in each country.  
8 6

#### 9 7 *Depth of payments in each country*

10 8 Fourth, we assessed companies making payments to the same recipients by measuring the  
11 9 average number of common recipients between each pair of companies (degree centrality).  
12 10

13 11 Fifth, we scrutinised which companies dominate the payment networks in each country by  
14 12 identifying the number of recipients that each company had in common with every other  
15 13 company.  
16 14

#### 17 15 *Structure of payments in each country*

18 16 Sixth, for each country we identified which type of recipient was prioritised. To do this, we  
19 17 measured and compared the proportion of payments received by each recipient type. We  
20 18 also compared the distribution of payments to each recipient type using Kruskal-Wallis tests  
21 19 to determine whether payments to similar types of recipients differ between countries.  
22 20

23 21 Seventh, we examined whether companies making payments to *each recipient type in each*  
24 22 *country* made payments to the same organisations by measuring the average number of  
25 23 recipients each pair of companies share.  
26 24

27 25 Finally, for each country we assessed which types of payments were prioritised through  
28 26 identifying the proportion of different payment types. We also compared the four types of  
29 27 payments using Kruskal-Wallis tests to identify differences in the distribution of payments.  
30 28

### 31 29 **Patient and public involvement**

32 30 The study did not involve patients.  
33 31

## 34 32 **RESULTS**

35 33  
36 34 We structure our findings consistent with the order of the outcome measures outlined  
37 35 above. First, we examine overall accuracy of disclosures. Next, we explore the breadth,  
38 36 depth, and structure of payments in each country. While there is inevitable overlap  
39 37 between these framing terms, this will be signposted throughout.  
40 38

### 41 39 **Accuracy of disclosures**

42 40 We found evidence of pharmaceutical companies misinterpreting disclosure requirements  
43 41 when we integrated the Disclosure UK and patient organisation data (see Supplementary  
44 42 File 3 for data integration flowchart). We identified 341 payments (1.71% of all payments to  
45 43 organisations in Disclosure UK) to 116 patient organisations (2.88% of all organisations in  
46 44 Disclosure UK) worth £2,458,931.99 (5.21% of the total) incorrectly disclosed as healthcare  
47 45 organisations in Disclosure UK. Of these payments, 50 (14.66%) were duplicated in the  
48 46 patient organisation and Disclosure UK data, which were excluded to ensure no payment  
49 47 was counted twice.  
50 51  
51 52  
52 53  
53 54  
54 55  
55 56  
56 57  
57 58  
58 59  
59 60  
60 61

## Breadth of payments in the four countries

The total value and number of payments, the number of recipients, and the number of companies making payments were consistent with the size of each country, with England receiving the highest and Northern Ireland the lowest (this was maintained after adjusting for population size – see Table 1).

Table 1. Value and number of payments, number of companies and recipients, and top donors in integrated dataset

| Descriptive statistic                             | England     | Scotland    | Wales       | Northern Ireland |
|---------------------------------------------------|-------------|-------------|-------------|------------------|
| Country population 2015* - n                      | 54,786,300  | 5,373,000   | 3,099,100   | 1,851,600        |
| Total value - £                                   | 52,445,615  | 3,649,749   | 1,987,703   | 518,000          |
| Total value - £ (adjusted for population size)†   | 957,037     | 675,880     | 641,194     | 272,632          |
| Payments - n                                      | 18,190      | 1,370       | 990         | 311              |
| Recipients - n                                    | 3,575       | 282         | 216         | 156              |
| Companies - n                                     | 100         | 72          | 64          | 42               |
| Median payment value (IQR) - £                    | 280 (665.5) | 400 (685.3) | 300 (658.2) | 475.20 (1,164.4) |
| Value of payments to healthcare organisations - £ | 40,217,772  | 3,029,365   | 1,887,918   | 474,795          |
| Value of payments to patient organisations - £    | 12,227,843  | 620,384     | 99,784      | 43,206           |

\*Data obtained from the Office for National Statistics, values correct for mid-2015

†Total value of payments divided by the population size

### Between-country differences in payment values

There was a statistically significant difference in the distribution of individual payments between the four countries,  $\chi^2(3) = 50.127$ ,  $p < .001$ . Dunn's post-hoc comparisons showed that this difference was driven by significantly higher median payments (Table 1) being made in Scotland ( $p < .001$ ) and Northern Ireland ( $p < .001$ ) than England. Payment size also varied significantly between Northern Ireland-Wales ( $p < .000$ ), Scotland-Wales ( $p = .001$ ), and Northern Ireland-Scotland ( $p = .004$ ).

### Top donors in each country

The companies spending most in each country also reveals different approaches to payments (see Supplementary File 4). The top donors generally made larger payments in Wales and multiple smaller payments in Northern Ireland. Pfizer was consistently a top donor measured by value and volume of payments in all four countries, indicating an approach to payments focused on breadth. At the country-level, in England, Novartis was the second biggest donor characterised by large payments; similar patterns characterised Biogen's payments in Scotland and Wales. England, Scotland and Northern Ireland all had at

1 least one top donor not featuring as a top donor in another country, indicating some  
2 companies' payments may be more targeted regionally than others.

#### 3 **Depth of engagement in the four countries**

4 Companies making payments in England had the highest number of common recipients - an  
5 average of six to seven recipients (Table 2), implying a significant concentration of shared  
6 interest around a spectrum of organisations. Companies, on average, had at least one  
7 recipient in common with another company in Scotland and Wales, and were least  
8 connected in Northern Ireland (Table 2), indicating that in smaller countries, company  
9 interest in particular recipients is more concentrated. The average weighted degree density  
10 score shows the average number of recipients a company shares with *all* companies in the  
11 network, where similarly the highest score was observed in England (664.36 recipients) and  
12 lowest in Northern Ireland. The visualised networks are in Supplementary File 5.

13  
14  
15 Table 2. Pharmaceutical company connections in each country measured by common  
16 recipients

| Network measure*                                                                                                                           | England        | Scotland     | Wales        | Northern Ireland |
|--------------------------------------------------------------------------------------------------------------------------------------------|----------------|--------------|--------------|------------------|
| <i>Density – average value (average number of recipients in common between two companies)</i>                                              | 6.71           | 1.24         | 1.13         | 0.42             |
| <i>Density – average weighted degree (average number of recipients in common for all companies in the network)</i>                         | 664.36         | 88.39        | 71.06        | 17.38            |
| <i>Company with highest degree centrality score (number of recipients a company has in common with all other companies in the network)</i> | Pfizer (3,394) | Pfizer (319) | Pfizer (206) | Pfizer (63)      |

17 \*Calculations were conducted on valued networks which means they consider the number of  
18 common recipients and not just the presence of a shared recipient. Networks include only  
19 companies making payments in each country.

20  
21 The data also indicates variation in the depth of payments at the company level, as some  
22 companies focus collectively on particular recipients and some companies target a broader  
23 set of organisations with exclusive funding. Pfizer consistently targeted the same recipients  
24 as other companies most frequently in every country. Pfizer's degree centrality score of  
25 3,394 in England shows that the company funded the same organisation as another  
26 company 3,394 times in the year (Table 2). Many of the most connected companies (see  
27 Supplementary File 6) were similar in England, Scotland and Wales. However, Northern  
28 Ireland's top ten most connected companies were more varied and featured smaller  
29 companies, suggesting that a cluster of companies had a unique interest Northern Ireland's  
30 health system. Further, differences between top donors and topmost connected companies  
31 in each country highlight potentially divergent strategies in targeted funding. For example,  
32 Merck Sharpe and Dohme was highly connected in every country but was not a top donor.

33  
34 Coupled, the SNA and descriptive data provides evidence that some companies prioritise  
35 breadth of payments, targeting a broader spectrum of organisations, while other companies

1 prioritise depth, targeting recipients which seem important or 'popular' across the industry  
2 and potentially competing with other companies for visibility.

### 3 **Structure of payments in each country**

#### 4 *Structural differences in targeted recipient types between countries*

5 The share of the total value of payments received by recipient types revealed diverse  
6 funding strategies in each country (Figure 1). In Wales and Scotland, industry targeted  
7 funding 'upstream' at healthcare commissioning, planning and regulatory organisations,  
8 primarily each country's local health boards that plan and deliver NHS services<sup>80 81</sup>. In Wales,  
9 they received just under half of all payments - £920,980.22 (46.38% of Wales' total  
10 payments, see Supplementary File 7 for values and Supplementary File 8 for top recipients).  
11 In Scotland, they received £878,333.57 (24.13%). Notably, the two Scottish health boards  
12 serving the fewest people received no payments. In England and Northern Ireland, funding  
13 was targeted 'downstream'. England's public sector secondary and tertiary care providers,  
14 namely consisting of NHS trusts which provide hospital and sometimes community  
15 healthcare services to residents<sup>82</sup>, received the most funding (£13,349,779.1 – 25.56%). In  
16 Northern Ireland, public sector primary care providers, primarily general practitioner  
17 practices, were targeted with the most funding (£184,903.09 – 35.72%).

18  
19  
20 Figure 1. Percentage of payments to recipient types per country

21  
22 There were statistically significant differences in the distribution of payments, indicating  
23 that payment values vary between the four countries even when the recipient type is the  
24 same (see Table 3). Post-hoc analyses maintained the significant differences, except for in  
25 patient organisations (see Supplementary File 9).

26  
27 Patient organisations were a major target of payments, especially in England and Scotland  
28 (Table 3). Professional organisations, including societies and groups of healthcare  
29 professionals, were prioritised in England, Scotland and Northern Ireland, with significant  
30 but negligible differences in payment values. Consistent with the locations of the top UK  
31 universities, industry targeted education and research providers in England (median =  
32 £1000) and Scotland, (£1,152) where payments were also significantly higher than Wales  
33 (£336). Public sector primary care providers, primarily general practitioner practices,  
34 received a very small proportion of the total funding in England and Scotland, yet had the  
35 most individual recipients in all four countries, suggesting smaller per-recipient payment  
36 totals. This is further reflected in the median values per recipient, which were significantly  
37 lower in England (£435) and Scotland (£435) than Wales (£800) and Northern Ireland (£600).

38  
39 Table 3. Differences in payment sizes between countries

| Recipient type                                  | Median (IQR) - £     |                      |                 |                  | p value |
|-------------------------------------------------|----------------------|----------------------|-----------------|------------------|---------|
|                                                 | England              | Scotland             | Wales           | Northern Ireland |         |
| Alternative providers of health services        | 200 (160 – 394)      | 700 (360 – 1,100)    | n/a             | 600 (550 - 600)  | 0.004*  |
| Charities and other third-sector organisations† | 223.52 (157 – 487.2) | 1700 (377.5 - 6,250) | 120 (120 - 180) | n/a              | 0.001*  |

|                                                                        |                          |                         |                       |                              |        |
|------------------------------------------------------------------------|--------------------------|-------------------------|-----------------------|------------------------------|--------|
| <i>Education and research providers</i>                                | 1000 (333.34 – 4,798.40) | 1152 (400 – 2,880)      | 336 (175.2 – 1000)    | 1100 (873.75 – 3525)         | 0.001* |
| <i>Formal bodies representing healthcare professionals</i>             | 200 (160 – 259.8)        | 213.6 (211.4 – 214.8)   | 120 (96 – 142)        | 1066.67 (933.33 – 1200.00)   | <.000* |
| <i>Healthcare commissioning, planning and regulatory organisations</i> | 208.17 (160 – 307.2)     | 240 (131.18 – 500)      | 225 (114.24 – 486.39) | 1500 (470.8 – 4,087)         | 0.008* |
| <i>Patient organisations</i>                                           | 4000 (500 – 11,104)      | 1000 (253.68 – 9,745)   | 747.93 (500 – 2,000)  | 650 (600 – 1,450)            | 0.011* |
| <i>Private companies other than providers of health services</i>       | 300 (196.8 – 598.92)     | 1,200 (350 – 5,528.88)  | 1475 (216 – 6,600)    | 4179.38 (1,152.19 – 7,687.5) | <.000* |
| <i>Private sector healthcare providers</i>                             | 240 (166 – 588)          | 647.54 (206.65 – 1,500) | 440 (360.94 – 1,732)  | 38.49 (28.9 – 485)           | <.000* |
| <i>Professional organisations</i>                                      | 500 (240 – 3,200)        | 450 (285.67 – 980)      | 400 (280 – 800)       | 600 (320 – 1,784)            | 0.001* |
| <i>Public administration and providers of public services</i>          | 394.4 (224.45 – 546.67)  | 540 (200 – 600)         | n/a                   | n/a                          | 0.238  |
| <i>Public sector primary care providers</i>                            | 434.5 (193.6 – 869)      | 434.5 (202.23 – 651.75) | 800 (434.5 – 1,152)   | 600 (434.5 – 1,600)          | <.000* |
| <i>Public sector secondary and tertiary care providers</i>             | 233.17 (141.87 – 500)    | 300 (189.75 – 612)      | 253.66 (200 – 954)    | 288 (163.4 – 490.13)         | 0.055  |

\*Statistically significant

†Excluding providers of health services, professional organisations and patient organisations

#### *Extent of company connections in targeted recipient types in each country*

Companies shared 5.8 common recipients on average among England's public sector secondary and tertiary care providers (Table 4), which also received the most funding. These patterns could be a function of the number of research-active NHS trusts located in England<sup>83</sup>, meaning service providers might be very effective at getting donor funds, but also suggest a high degree of targeting by industry. Notably, although healthcare commissioning, planning and regulatory organisations, primarily clinical commissioning groups responsible for the planning and purchasing of local health care services<sup>84</sup>, received very little funding in England, companies frequently target the same recipients, indicating that low funding does not infer an absence of interest.

In Scotland and Wales, companies targeted the same healthcare commissioning, planning and regulatory organisations most frequently, consistent with the financial prioritisation. In Northern Ireland, the density score for public sector primary care providers was higher than the other countries, suggesting some companies have overlapping interests in specific recipients in pockets of Northern Ireland's primary care system. In Wales, Scotland and Northern Ireland in particular, these patterns of common recipients pose a potentially greater risk to certain areas of the healthcare ecosystem becoming vulnerable to influence given the much smaller population the organisations serve.

1 Table 4. Density scores for valued recipient type networks in each country

| Recipient type                                                         | Density scores* |          |       |                  |
|------------------------------------------------------------------------|-----------------|----------|-------|------------------|
|                                                                        | England         | Scotland | Wales | Northern Ireland |
| <i>Alternative providers of health services</i>                        | 0.339†          | 0.500    | -     | 0.000            |
| <i>Charities and other third-sector organisations</i>                  | 0.510           | 0.333    | 0.476 | -                |
| <i>Education and research providers</i>                                | 1.194           | 0.727    | 0.675 | 1.000            |
| <i>Formal bodies representing healthcare professionals</i>             | 1.293           | 0.000    | 0.400 | 0.000            |
| <i>Healthcare commissioning, planning and regulatory organisations</i> | 2.523           | 1.578    | 1.634 | 0.133            |
| <i>Patient organisations</i>                                           | 0.337           | 0.200    | 0.109 | 0.209            |
| <i>Private companies other than providers of health services</i>       | 0.312           | 0.121    | 0.071 | 0.000            |
| <i>Private sector healthcare providers</i>                             | 0.416           | 0.167    | 0.167 | 0.067            |
| <i>Professional organisations</i>                                      | 0.611           | 0.244    | 0.114 | 0.038            |
| <i>Public administration and providers of public services</i>          | 0.022           | 0.300    | 0.000 | -                |
| <i>Public sector primary care providers</i>                            | 0.893           | 0.038    | 0.124 | 1.600            |
| <i>Public sector secondary and tertiary care providers</i>             | 5.819           | 1.309    | 1.000 | 0.826            |

2 \* Density scores measure the average number of common recipients between two companies. The  
3 network matrix for each recipient type consisted only of companies making payments. Dashes  
4 indicate no payments were made. Scores of 0.000 indicate all recipients received payments from  
5 one company only.

6 †Example interpretation: a score of 0.339 indicates that each company making payments to  
7 alternative providers of health services funded, on average, 0.3 recipients in common with another  
8 company.

#### 9 *Prioritised payment types in each country*

10 Another dimension of structure that differed between countries was the type of payments  
11 (Figure 2). Donations and grants, such as medical and educational goods, were consistently  
12 prioritised, however there was notable diversity between countries among the remaining  
13 payment types. Payments for joint working, defined as initiatives involving shared  
14 investment by the NHS and pharmaceutical companies<sup>85</sup>, varied from 19.61% of all  
15 payments in Wales to 2.29% in Northern Ireland; fees for service and consultancy varied  
16 from 33.78% in Scotland to 4.86% in Northern Ireland; and contributions to costs of events,  
17 such as science or medical focused conferences and educational events, ranged from  
18 31.87% in Northern Ireland to 18.58% in Wales.



## Figure 2. Percentage of total value for each payment type

There was a statistically significant difference between the distribution of payments for costs of events ( $p = .000$ ), which were lowest in Wales (£223) and highest in Northern Ireland (£478), and donations and grants ( $p = <.000$ ), which were lowest in Northern Ireland (£435) and highest in England (£960). Differences in fees for service and consultancy ( $p = .995$ ) and joint working ( $p = .261$ ) were non-significant (see Supplementary File 10).

## DISCUSSION

### Principle findings

Our findings offer insights into the pharmaceutical industry's strategic approach to payments tailored to the policy and decision-making context between, and even within, each country. Our findings also indicate that the pharmaceutical industry's 'web of influence'<sup>14</sup> can be relatively structured and aligned with key within-country differences in health system design and processes, as well as cross-nationally. Our comparative analysis illustrates novel ethical and governance problems as well as commonalities across countries and confirms concerns that UK-level analysis<sup>25 38</sup> obscures important regional payment variations and recipient vulnerabilities<sup>16</sup>. The oversight of strategic specificity is important not least because key decisions about commissioning of health services are taken within each country<sup>47 61</sup>.

### Findings in context

Our findings align with previous comparative analyses of payments to teaching hospitals<sup>31</sup> and healthcare professionals in the United States, which show significant payment differences between regions<sup>20 48 49 86</sup>. Our findings also mirror those from a comparative study of industry payments to patient organisations in Denmark and Sweden, where larger payments were more frequent in the smallest country<sup>16</sup>, suggesting a consistent industry strategy of targeting smaller locations with larger payments.

The concentration of payments among a few companies in each country was also consistent with previous studies of patient organisations<sup>16 38 87</sup> and healthcare organisations<sup>25 31 61</sup>. We identified Pfizer as a top donor, targeting many 'popular' recipients in all four UK countries, however it remains unclear if this relates to a particular product launch<sup>40 88</sup>, a new push relative to emerging competition, or reflects a consistent trend. Further interpretation would be facilitated by longitudinal analysis. There were also differences in the companies providing the most funding, particularly in Northern Ireland where the top donors were similar to those making payments to healthcare organisations in the Republic of Ireland<sup>28</sup> rather than the other three UK countries, indicating that some companies may strategically target organisations on the island. One isolated case was Napp Pharmaceuticals, which featured as both a top donor and top-most connected company uniquely in Northern Ireland, suggesting that specific companies can dominate payment networks in relation to smaller countries under the radar. These instances may have direct implications for public health. For example, Napp Pharmaceuticals is an opioid manufacturer<sup>89</sup> and opioid manufacturers in the United States have been known to leverage targeted funding, including to teaching hospitals<sup>31</sup>, to increase opioid prescribing<sup>90</sup>.

1  
2  
3 1 Discrepancies in the types of payments prioritised also point towards sub-national  
4 2 vulnerabilities in each countries' healthcare ecosystem. In Wales, the prioritisation of joint  
5 3 working raises concerns around the extent of pharmaceutical industry involvement in  
6 4 healthcare design. Joint working arrangements are intended to bring benefits to patients,  
7 5 the NHS, and companies, however many of these projects mention increasing the use of  
8 6 company products<sup>91</sup>, potentially serving as an alternative avenue for industry marketing.  
9 7 Similarly, in Northern Ireland, costs of events were higher than the other countries, pointing  
10 8 towards an alternative channel for industry involvement in continuing medical education in  
11 9 a country with fewer professional organisations or large universities. This pattern of  
12 10 frequent event payments was also observed in the Republic of Ireland<sup>28</sup>, further indicating  
13 11 island-specific trends.

### 12 12

#### 13 13 **Lessons for transparency**

14 14 The transparency concerns we identified are consistent with previous studies of  
15 15 pharmaceutical industry disclosure practices in the UK<sup>4 42</sup> and Europe<sup>35 41</sup>. Although the UK's  
16 16 self-regulatory payment disclosure system is the most robust in Europe<sup>17 92</sup>, our analysis  
17 17 confirms earlier concerns about some payments being disclosed on the incorrect platform  
18 18 and thereby preventing their correct identification by policymakers, regulators, and  
19 19 members of the public<sup>39 42</sup>. Our findings indicate that some instances of under-reporting<sup>39</sup>  
20 20 may be explained by confusion about where to report.

21 21

22 22 These issues, coupled with the extensive additional research required to standardise and  
23 23 categorise recipient types and their locations in the UK, indicate that the self-regulatory  
24 24 system is incomplete and requires better integration. This could be achieved through a  
25 25 single standardised database comprising all pharmaceutical industry payments and  
26 26 combining the highest standards of reporting as they currently apply to, separately,  
27 27 healthcare and patient organisations. For example, EFPIA requires individual disclosures of  
28 28 payments to patient organisations to include descriptions of funded activities<sup>42</sup>, a provision  
29 29 that should be extended to healthcare organisations. As a minimum, compulsory recipient  
30 30 identifiers should be introduced<sup>35</sup> to reduce the substantial forensic work involved in  
31 31 cleaning these data and encourage longitudinal comparisons. Echoing calls in the US for  
32 32 state-specific disclosure policies<sup>51</sup>, Disclosure UK and disclosures of payments to patient  
33 33 organisations need to be adapted to better capture the distinction between payments in  
34 34 England, Scotland, Wales, and Northern Ireland.

35 35

36 36 Whilst baseline improvements in data accessibility and quality are imperative, a central  
37 37 database should also contain associated analytics, including descriptive and network  
38 38 statistics. Otherwise, we run the risk that pharmaceutical companies themselves gain more  
39 39 from the payment disclosure system than the public, as companies use disclosures to inform  
40 40 and fine-tune their marketing efforts<sup>93 67</sup>.

#### 41 41

#### 42 42 **Strengths and limitations**

43 43 This is the first study to jointly analyse payments to healthcare and patient organisations,  
44 44 which was made possible by the current UK transparency provisions. It also is the first of its  
45 45 kind to explore payments across the four UK countries. To date, the spotlight has been on  
46 46 individual COIs, which may downplay the systemic problem of a broader institutional culture  
47 47 whereby industry funding is embraced and industry interests can be advanced<sup>14 90</sup>.

1  
2  
3 1 However, our study has limitations. We focus only on 2015 data due to the substantial time  
4 2 required to prepare Disclosure UK data for effective analysis, particularly categorising  
5 3 recipients to make them distinguishable, and identifying recipient countries. We can assume  
6 4 the patterns are maintained over time as the overall payment values have remained stable  
7 5 each year<sup>38 94</sup>, however longitudinal analysis would confirm this. Also, we could not  
8 6 determine whether sharing recipients was accidental or intentional, nor did we measure the  
9 7 impact of these payments.  
10 8

### 13 9 **Conclusion**

14 10 Regional variability in payments has implications for sub-national policymaking<sup>51</sup> and it  
15 11 appears that there are specific vulnerabilities to potential institutional COIs arising at a sub-  
16 12 national level. These payment differences may also be occurring in other countries,  
17 13 particularly those with decentralised health system structures and/or high levels of  
18 14 independence across their decision-making authorities. Future research could examine  
19 15 factors contributing to regional payment differences to better inform future government or  
20 16 industry policies to mitigate against undue influence.  
21  
22  
23  
24  
25  
26  
27  
28  
29  
30  
31  
32  
33  
34  
35  
36  
37  
38  
39  
40  
41  
42  
43  
44  
45  
46  
47  
48  
49  
50  
51  
52  
53  
54  
55  
56  
57  
58  
59  
60

### **Ethical approval**

The study did not require ethical approval (as it draws on publicly available data at the organisational level), however it is part of a bigger project which has ethical approval from the University of Bath's Social Sciences Research Ethics Committee (approval code: S19-073).

### **Funding statement**

ER's work was supported by a +3 PhD Studentship award match-funded (50%) by the Economic and Social Research Council and the University of Bath. This work forms part of the PhD project. PO's work was supported by grants from The Swedish Research Council for Health, Working Life and Welfare (FORTE), no. 2016-00875, and The Swedish Research Council (VR), no. 2020-01822.

### **Competing interests statement**

ER and EC have no conflicts of interests to declare. PO's PhD student was supported by a grant from Sigma Pharmaceuticals, a UK pharmacy wholesaler and distributor (not a pharmaceutical company). The PhD work funded by Sigma Pharmaceuticals is unrelated to the subject of this paper.

### **Author contributions**

ER designed, managed, analysed and interpreted the data, as well as drafted the article. PO conceived and designed the study, provided supervision, and drafted the article. EC co-supervised the analysis and contributed to drafting the article.

### **Data availability statement**

All data relevant to the study are included in the article or uploaded as supplementary information. The authors of this study agree to share data underpinning this study in the form of an Excel database available from the University of Bath Research Data Archive. The raw data poses no risk to anonymity of individuals as it draws on publicly available reports concerning financial transfers between organisations. The reference for this dataset is: Rickard, E., Ozieranski, P., 2023. *Dataset for "Comparing pharmaceutical company payments in the four UK countries: a cross-sectional and social network analysis"*. Bath: University of Bath Research Data Archive. <https://doi.org/10.15125/BATH-01239>.

1  
2  
3  
4  
5  
6  
7  
8  
9  
10  
11  
12  
13  
14  
15  
16  
17  
18  
19  
20  
21  
22  
23  
24  
25  
26  
27  
28  
29  
30  
31  
32  
33  
34  
35  
36  
37  
38  
39  
40  
41  
42  
43  
44  
45  
46  
47  
48  
49  
50  
51  
52  
53  
54  
55  
56  
57  
58  
59  
60  
**REFERENCES**

1. Lexchin J. Pharmaceutical company spending on research and development and promotion in Canada, 2013-2016: a cohort analysis. *J Pharm Policy Pract* 2018;11:5-5. doi: 10.1186/s40545-018-0132-3
2. AHIP. New Study: In the Midst of COVID-19 Crisis, 7 out of 10 Big Pharma Companies Spent More on Sales and Marketing than R&D 2021 [Available from: <https://www.ahip.org/news/articles/new-study-in-the-midst-of-covid-19-crisis-7-out-of-10-big-pharma-companies-spent-more-on-sales-and-marketing-than-r-d>].
3. Swanson A. Big pharmaceutical companies are spending far more on marketing than research. *The Washington Post*, 2015.
4. Mulinari S, Ozieranski P. Disclosure of payments by pharmaceutical companies to healthcare professionals in the UK: analysis of the Association of the British Pharmaceutical Industry's Disclosure UK database, 2015 and 2016 cohorts. *BMJ Open* 2018;8(10):e023094. doi: 10.1136/bmjopen-2018-023094
5. Rodwin MA. Conflict of Interest in the Pharmaceutical Sector: A Guide for Public Management. *DePaul J Health Care L* 2019;21
6. Humphreys K, Shover CL, Andrews CM, et al. Responding to the opioid crisis in North America and beyond: recommendations of the Stanford-Lancet Commission. *The Lancet* 2022;399(10324):555-604. doi: 10.1016/S0140-6736(21)02252-2
7. Lo YL. Further insights on institutional conflicts of interest in research settings. *Proceedings of Singapore Healthcare* 2020;29(1):3-4. doi: 10.1177/2010105820909983
8. Schafer A. Institutional conflict of interest: attempting to crack the deferiprone mystery. *Journal of Medical Ethics* 2021;47(8):531. doi: 10.1136/medethics-2019-105498
9. Lo B, Field MJ. Conflict of interest in medical research, education, and practice. 2009
10. Lemmens T, Miller PB. The human subjects trade: ethical and legal issues surrounding recruitment incentives. *J Law Med Ethics* 2003;31(3):398-418. doi: 10.1111/j.1748-720x.2003.tb00103.x [published Online First: 2003/11/25]
11. Moynihan R, Bero L. Toward a Healthier Patient Voice: More Independence, Less Industry Funding. *JAMA Internal Medicine* 2017;177(3):350-51. doi: 10.1001/jamainternmed.2016.9179
12. Sismondo S. Ghost-managed medicine: Big pharma's invisible hands: Mattering Press 2018:8.
13. Rickard E, Ozieranski P. A hidden web of policy influence: The pharmaceutical industry's engagement with UK's All-Party Parliamentary Groups. *PLOS ONE* 2021;16(6):e0252551. doi: 10.1371/journal.pone.0252551
14. Marks JH. The perils of partnership: industry influence, institutional integrity, and public health: Oxford University Press 2019.
15. EFPIA. EFPIA CODE OF PRACTICE, 2019.
16. Mulinari S, Pashley D, Ozieranski P. Advancing international comparison of pharmaceutical industry funding of patient advocacy: Focus on Denmark. *Health Policy* 2022;126(12):1256-62. doi: <https://doi.org/10.1016/j.healthpol.2022.11.003>
17. Mulinari S, Martinon L, Jachiet P-A, et al. Pharmaceutical industry self-regulation and non-transparency: country and company level analysis of payments to healthcare professionals in seven European countries. *Health Policy* 2021;125(7):915-22. doi: <https://doi.org/10.1016/j.healthpol.2021.04.015>

18. Agrawal S, Brennan N, Budetti P. The Sunshine Act—effects on physicians. *N Engl J Med* 2013;2013(368):2054-57.
19. Ahmed R, Bae S, Hicks CW, et al. Here Comes the Sunshine: Industry's Payments to Cardiothoracic Surgeons. *Annals of Thoracic Surgery* 2017;103(2):567-72. doi: 10.1016/j.athoracsur.2016.06.053
20. Braithwaite J, Frane N, Partan MJ, et al. Review of Industry Payments to General Orthopaedic Surgeons Reported by the Open Payments Database: 2014 to 2019. *JAAOS Global Research & Reviews* 2021;5(5)
21. Fleischman W, Ross JS, Melnick ER, et al. Financial Ties Between Emergency Physicians and Industry: Insights From Open Payments Data. *Annals of Emergency Medicine* 2016;68(2):153-58.e4. doi: 10.1016/j.annemergmed.2016.01.014
22. Maruf M, Sidana A, Fleischman W, et al. Financial Relationships between Urologists and Industry: An Analysis of Open Payments Data. *Urology Practice* 2018;5(3):180-86. doi: 10.1016/j.urpr.2017.03.012
23. Slentz DH, Nelson CC, Lichter PR. Characteristics of Industry Payments to Ophthalmologists in the Open Payments Database. *JAMA Ophthalmology* 2019;137(9):1038-44. doi: 10.1001/jamaophthalmol.2019.2456
24. Moynihan R, Fabbri A, Parker L, et al. Mixed methods evaluation of workshops for citizen health advocates about financial conflicts of interests in healthcare. *BMJ Open* 2020;10(5) doi: 10.1136/bmjopen-2019-034195
25. Ozieranski P, Csanadi M, Rickard E, et al. Analysis of Pharmaceutical Industry Payments to UK Health Care Organizations in 2015. *JAMA Network Open* 2019;2(6):e196253-e53. doi: 10.1001/jamanetworkopen.2019.6253
26. Parker L, Karanges EA, Bero L. Changes in the type and amount of spending disclosed by Australian pharmaceutical companies: an observational study. *BMJ open* 2019;9(2):e024928.
27. Fabbri A, Grundy Q, Mintzes B, et al. A cross-sectional analysis of pharmaceutical industry-funded events for health professionals in Australia. *BMJ open* 2017;7(6):e016701.
28. Moriarty F, Larkin J, Fahey T. Payments reported by the pharmaceutical industry in Ireland from 2015 to 2019: an observational study. *Health Policy* 2021 doi: <https://doi.org/10.1016/j.healthpol.2021.07.016>
29. Ozaki A, Saito H, Senoo Y, et al. Overview and transparency of non-research payments to healthcare organizations and healthcare professionals from pharmaceutical companies in Japan: Analysis of payment data in 2016. *Health Policy* 2020;124(7):727-35. doi: <https://doi.org/10.1016/j.healthpol.2020.03.011>
30. Ozaki A, Saito H, Onoue Y, et al. Pharmaceutical payments to certified oncology specialists in Japan in 2016: a retrospective observational cross-sectional analysis. *BMJ Open* 2019;9(9):e028805. doi: 10.1136/bmjopen-2018-028805
31. Anderson TS, Gellad WF, Good CB. Characteristics of biomedical industry payments to teaching hospitals. *Health Affairs* 2020;39(9):1583-91. doi: 10.1377/hlthaff.2020.00385
32. Association of the British Pharmaceutical Industry. Working with patients and patient organisations. A sourcebook for industry, 2022.
33. McCoy MS, Carniol M, Chockley K, et al. Conflicts of interest for patient-advocacy organizations. *New England Journal of Medicine* 2017;376(9):880-85.

- 1  
2  
3 1 34. Rose SL, Highland J, Karafa MT, et al. Patient Advocacy Organizations, Industry Funding,  
4 2 and Conflicts of Interest. *JAMA Internal Medicine* 2017;177(3):344-50. doi:  
5 3 10.1001/jamainternmed.2016.8443  
6 3  
7 4 35. Ozieranski P, Martinon, L., Jachiet, P., Mulinari, S. Accessibility and quality of drug  
8 5 company disclosures of payments to healthcare professionals and organisations in  
9 6 37 countries: A European policy review. *BMJ Open* 2021  
10 7  
11 7 36. Fabbri A, Parker L, Colombo C, et al. Industry funding of patient and health consumer  
12 8 organisations: systematic review with meta-analysis. *BMJ* 2020;368:l6925. doi:  
13 9 10.1136/bmj.l6925  
14 10 37. EFPIA. EFPIA CODE OF PRACTICE ON RELATIONSHIPS BETWEEN THE PHARMACEUTICAL  
15 11 INDUSTRY AND PATIENT ORGANISATIONS, 2011.  
16 12 38. Ozieranski P, Rickard E, Mulinari S. Exposing drug industry funding of UK patient  
17 13 organisations. *BMJ* 2019;365:l1806. doi: 10.1136/bmj.l1806  
18 14 39. Ozieranski P, Csanadi M, Rickard E, et al. Underreporting of drug industry payments to  
19 15 patient organisations in the UK (2012-2016). 2020  
20 16 40. Mulinari S, Vilhelmsson A, Rickard E, et al. Five years of pharmaceutical industry funding  
21 17 of patient organisations in Sweden: Cross-sectional study of companies, patient  
22 18 organisations and drugs. *PLOS ONE* 2020;15(6):e0235021. doi:  
23 19 10.1371/journal.pone.0235021  
24 20 41. Pashley D OP, Mulinari S. . Disclosure of pharmaceutical industry funding of patient  
25 21 organizations in Nordic countries: can industry self-regulation deliver on its  
26 22 transparency promise? *International Journal of Health Services* 2022  
27 23 42. Rickard E, Ozieranski P, Mulinari S. Evaluating the transparency of pharmaceutical  
28 24 company disclosure of payments to patient organisations in the UK. *Health Policy*  
29 25 2019;123(12):1244-50.  
30 26 43. EFPIA. The EFPIA Disclosure Code: Your Questions Answered, 2014.  
31 27 44. Association of the British Pharmaceutical Industry. Definitions - Disclosure 2022  
32 28 [Available from: [https://www.abpi.org.uk/reputation/disclosure-uk/about-](https://www.abpi.org.uk/reputation/disclosure-uk/about-disclosure-uk/definitions-disclosure/)  
33 29 [disclosure-uk/definitions-disclosure/](https://www.abpi.org.uk/reputation/disclosure-uk/about-disclosure-uk/definitions-disclosure/).  
34 30 45. Keller AC, Packel L. Going for the cure: patient interest groups and health advocacy in  
35 31 the United States. *J Health Polit Policy Law* 2014;39(2):331-67. doi:  
36 32 10.1215/03616878-2416238 [published Online First: 2013/12/07]  
37 33 46. Hegde D, Sampat B. Can private money buy public science? Disease group lobbying and  
38 34 federal funding for biomedical research. *Management Science* 2015;61(10):2281-98.  
39 35 47. Moberly T. CCGs fail to declare pharma funding. *BMJ* 2018;360:j5911. doi:  
40 36 10.1136/bmj.j5911  
41 37 48. Niforatos JD, Boas S, Hertz S, et al. Analysis of current financial relationships between  
42 38 emergency physicians and industry. *American Journal of Emergency Medicine*  
43 39 2019;37(4):722-25. doi: 10.1016/j.ajem.2018.12.039  
44 40 49. Cheng T, Boelitz K, Rybin D, et al. Nationwide patterns in industry payments to academic  
45 41 vascular surgeons. *Journal of Vascular Surgery* 2021;73(2):675-81. doi:  
46 42 10.1016/j.jvs.2020.04.527  
47 43 50. Garstka ME, Monlezun D, DuCoin C, et al. The Sunshine Act and surgeons: a nation-wide  
48 44 analysis of industry payments to physicians. *Journal of Surgical Research*  
49 45 2019;233:41-49. doi: 10.1016/j.jss.2018.07.004  
50  
51  
52  
53  
54  
55  
56  
57  
58  
59  
60

- 1  
2  
3 1 51. Cuomo RE, Cai M, Shah N, et al. Physicians payment in the United States between 2014  
4 2 and 2018: An analysis of the CMS Open Payments database. *PLOS ONE*  
5 3 2021;16(6):e0252656. doi: 10.1371/journal.pone.0252656  
6 4  
7 52. Mejia J, Mejia A, Pestilli F. Open data on industry payments to healthcare providers  
8 5 reveal potential hidden costs to the public. *Nature Communications* 2019;10(1) doi:  
9 6 10.1038/s41467-019-12317-z  
10 7  
11 53. Ozieranski P, Pitter J, Rickard E, et al. A “patient-industry complex”? Investigating the  
12 8 financial dependency of UK patient organisations on drug company funding.  
13 9 *Sociology of Health & Illness* 2021  
14 10  
15 54. EFPIA. The Pharmaceutical Industry in Figures, 2016.  
16 11  
17 55. Hyndman N. Editorial: The charity sector— changing times, changing challenges. *Public*  
18 12 *Money & Management* 2017;37(3):149-53. doi: 10.1080/09540962.2017.1281608  
19 13  
20 56. Greer SL. Territorial politics and health policy: UK health policy in comparative  
21 14 perspective: Manchester University Press 2004.  
22 15  
23 57. Birrell D. Comparing devolved governance: Palgrave Macmillan 2012.  
24 16  
25 58. Cheung A, Paun A, Valsamidis L. Devolution at 20. Institute for Government, 2019.  
26 17  
27 59. ONS. Population estimates for the UK, England and Wales, Scotland and Northern  
28 18 Ireland: mid-2015 2016 [Available from:  
29 19 [https://www.ons.gov.uk/peoplepopulationandcommunity/populationandmigration/](https://www.ons.gov.uk/peoplepopulationandcommunity/populationandmigration/populationestimates/bulletins/annualmidyearpopulationestimates/mid2015)  
30 20 [populationestimates/bulletins/annualmidyearpopulationestimates/mid2015](https://www.ons.gov.uk/peoplepopulationandcommunity/populationandmigration/populationestimates/bulletins/annualmidyearpopulationestimates/mid2015)  
31 21 accessed 13th September 2021.  
32 22  
33 60. Office for National Statistics. Life expectancy for local areas of the UK: between 2001 to  
34 23 2003 and 2017 to 2019 2020 [Available from:  
35 24 [https://www.ons.gov.uk/peoplepopulationandcommunity/healthandsocialcare/health](https://www.ons.gov.uk/peoplepopulationandcommunity/healthandsocialcare/healthandlifeexpectancies/bulletins/lifeexpectancyforlocalareasoftheuk/between2001to2003and2017to2019)  
36 25 [handlifeexpectancies/bulletins/lifeexpectancyforlocalareasoftheuk/between2001to](https://www.ons.gov.uk/peoplepopulationandcommunity/healthandsocialcare/healthandlifeexpectancies/bulletins/lifeexpectancyforlocalareasoftheuk/between2001to2003and2017to2019)  
37 26 [2003and2017to2019](https://www.ons.gov.uk/peoplepopulationandcommunity/healthandsocialcare/healthandlifeexpectancies/bulletins/lifeexpectancyforlocalareasoftheuk/between2001to2003and2017to2019) accessed 28th August 2021.  
38 27  
39 61. Saghy E, Mulinari S, Ozieranski P. Drug company payments to General Practices in  
40 28 England: cross-sectional and social network analysis. *PLOS ONE* 2021  
41 29  
42 62. Kirchhof P. A tale of two countries: how decentralized organization and long-term  
43 30 investment build resilient healthcare systems. *Eur Heart J Qual Care Clin Outcomes*  
44 31 2020;6(3):201-03. doi: 10.1093/ehjqcco/qcaa036 [published Online First:  
45 32 2020/05/07]  
46 33  
47 63. Martin-Moreno JM, Alonso P, Claveria A, et al. Spain: a decentralised health system in  
48 34 constant flux. *BMJ* 2009;338:b1170. doi: 10.1136/bmj.b1170  
49 35  
50 64. Rahul A. ea. Leveraging CMS Open Payments Data to Identify Channel Preferences and  
51 36 Gather Competitive Intelligence, Thereby Improving HCP Targeting. *Pharmaceutical*  
52 37 *Management Science Association* 2021  
53 38  
54 65. Hollands S. Receipt of Promotional Payments at the Individual and Physician Network  
55 39 Level Associated with Higher Branded Antipsychotic Prescribing Rates. *Adm Policy*  
56 40 *Ment Health* 2020;47(1):73-85. doi: 10.1007/s10488-019-00974-7  
57 41  
58 66. Agha L, Zeltzer D. DRUG DIFFUSION THROUGH PEER NETWORKS: THE INFLUENCE OF  
59 42 INDUSTRY PAYMENTS. *NBER WORKING PAPER SERIES* 2020;Working Paper 26338  
60 43  
61 67. Anand R CD, Yan J, et al. Leveraging CMS Open Payments Data to Identify Channel  
44 Preferences and Gather Competitive Intelligence, Thereby Improving HCP Targeting.  
45 *Journal of the Pharmaceutical Management Science Association* 2017 doi:  
46 <https://www.pmsa.org/jpmsa-vol05-article06>



- 1  
2  
3 1 68. Mulinari S, Ozieranski P. Capitalizing on transparency: Commercial surveillance and  
4 2 pharmaceutical marketing after the Physician Sunshine Act. *Big Data & Society*  
5 3 2022;9(1):20539517211069631. doi: 10.1177/20539517211069631  
6 4 69. Oldani MJ. Tales From The" Script": An Insider/Outside View Of Pharmaceutical Sales  
7 5 Practice. *Kroeber Anthropological Society Papers* 2002:147-76.  
8 6 70. Association of the British Pharmaceutical Industry. CODE OF PRACTICE for the  
9 7 PHARMACEUTICAL INDUSTRY 2015, 2015.  
10 8 71. Dunn OJ. Multiple Comparisons Using Rank Sums. *Technometrics* 1964;6(3):241-52. doi:  
11 9 10.1080/00401706.1964.10490181  
12 10 72. Baadh AS, Baadh PK, Islam S, et al. IR and the Sunshine Act: Two-Year Analysis of the  
13 11 Open Payments Database and Comparison with Related Specialties. *Journal of*  
14 12 *Vascular and Interventional Radiology* 2017;28(2):200-05. doi:  
15 13 10.1016/j.jvir.2016.10.008  
16 14 73. Morse E, Fujiwara RJT, Mehra S. Increasing Industry Involvement in Otolaryngology:  
17 15 Insights from 3 Years of the Open Payments Database. *Otolaryngology - Head and*  
18 16 *Neck Surgery (United States)* 2018;159(3):501-07. doi: 10.1177/0194599818778502  
19 17 74. Baadh AS, Patel M, Patel K, et al. Medical industry at tumor board: Three-years analysis  
20 18 of the open payments database and comparison of oncologic specialties. *Journal of*  
21 19 *Surgical Oncology* 2018;117(4):551-57. doi: 10.1002/jso.24899  
22 20 75. Borgatti SP, Everett MG, Johnson JC. Analyzing social networks: Sage 2018.  
23 21 76. Snijders TA, Faye M, Brailly J. Network dynamics with a nested node set: Sociability in  
24 22 seven villages in Senegal. *Statistica Neerlandica* 2020;74(3):300-23.  
25 23 77. Borgatti SP, Everett, M.G. and Freeman, L.C. . Ucinet for Windows: Software for Social  
26 24 Network Analysis. Harvard, MA: Analytic Technologies 2002.  
27 25 78. Borgatti S. Centrality and Centralization 2000 [Available from:  
28 26 <http://www.analytictech.com/mb119/chapter5.htm> accessed 20th July 2021.  
29 27 [dataset] 79. Rickard E, Ozieranski, P.,. Dataset for "Comparing pharmaceutical company  
30 28 payments in the four UK countries: a cross-sectional and social network analysis":  
31 29 Bath: University of Bath Research Data Archive, 2023.  
32 30 80. Welsh Government. NHS Wales health boards and trusts 2022 [Available from:  
33 31 <https://www.gov.wales/nhs-wales-health-boards-and-trusts>.  
34 32 81. NHS Scotland. NHSScotland Health Boards 2022 [Available from:  
35 33 [https://www.careers.nhs.scot/careers/find-your-career/international-](https://www.careers.nhs.scot/careers/find-your-career/international-recruitment/nhsscotland-health-boards/)  
36 34 [recruitment/nhsscotland-health-boards/](https://www.careers.nhs.scot/careers/find-your-career/international-recruitment/nhsscotland-health-boards/).  
37 35 82. Foundation Trust Network. BUILDING A HEALTHY NHS AROUND PEOPLE'S NEEDS. AN  
38 36 INTRODUCTION TO NHS FOUNDATION TRUSTS AND TRUSTS, 2015.  
39 37 83. Noclор. EVERY NHS TRUST IN ENGLAND IS NOW RESEARCH-ACTIVE 2022 [Available from:  
40 38 <https://www.noclор.nhs.uk/every-nhs-trust-england-now-research-active>.  
41 39 84. NHS Confederation. What are clinical commissioning groups? 2021 [Available from:  
42 40 <https://www.nhsconfed.org/articles/what-are-clinical-commissioning-groups>.  
43 41 85. Association of the British Pharmaceutical Industry. Joint Working: A toolkit for industry  
44 42 and the NHS, 2019.  
45 43 86. Brauer PR, Morse E, Mehra S. Industry Payments for Otolaryngology Research: A Four-  
46 44 Year Analysis of the Open Payments Database. *Laryngoscope* 2020;130(2):314-20.  
47 45 doi: 10.1002/lary.27896  
48  
49  
50  
51  
52  
53  
54  
55  
56  
57  
58  
59  
60

- 1  
2  
3  
4 1 87. Fabbri A, Swandari S, Lau E, et al. Pharmaceutical industry funding of health consumer  
5 2 groups in Australia: a cross-sectional analysis. *International Journal of Health Services*  
6 3 2019;49(2):273-93.  
7 4 88. Baggott R, Allsop J, Jones K. Speaking for patients and carers: health consumer groups  
8 5 and the policy process: Macmillan International Higher Education 2014.  
9 6 89. Keefe PR. Empire of pain: The secret history of the Sackler dynasty: Anchor 2021.  
10 7 90. Marks JH. Lessons from Corporate Influence in the Opioid Epidemic: Toward a Norm of  
11 8 Separation. *Journal of Bioethical Inquiry* 2020;17(2):173-89. doi: 10.1007/s11673-  
12 9 020-09982-x  
13 10 91. Moberly T. NHS joint working with industry is out of public sight. *BMJ* 2019;364:l1353.  
14 11 doi: 10.1136/bmj.l1353  
15 12 92. Ozaki POHSERSMA. International comparison of pharmaceutical industry payment  
16 13 disclosures in the UK and Japan: implications for self-regulation, public regulation,  
17 14 and transparency. *Globalization and Health* 2023 doi: 10.1186/s12992-022-00902-9  
18 15 93. Kanter GP, Loewenstein G. Evaluating open payments. *Jama* 2019;322(5):401-02.  
19 16 94. Association of the British Pharmaceutical Industry. Disclosure UK 2022 [Available from:  
20 17 <https://www.abpi.org.uk/reputation/disclosure-uk/>.  
21 18  
22 19  
23  
24  
25  
26  
27  
28  
29  
30  
31  
32  
33  
34  
35  
36  
37  
38  
39  
40  
41  
42  
43  
44  
45  
46  
47  
48  
49  
50  
51  
52  
53  
54  
55  
56  
57  
58  
59  
60

1  
2  
3  
4  
5  
6  
7  
8  
9  
10  
11  
12  
13  
14  
15  
16  
17  
18  
19  
20  
21  
22  
23  
24  
25  
26  
27  
28  
29  
30  
31  
32  
33  
34  
35  
36  
37  
38  
39  
40  
41  
42  
43  
44  
45  
46  
47  
48  
49  
50  
51  
52  
53  
54  
55  
56  
57  
58  
59  
60

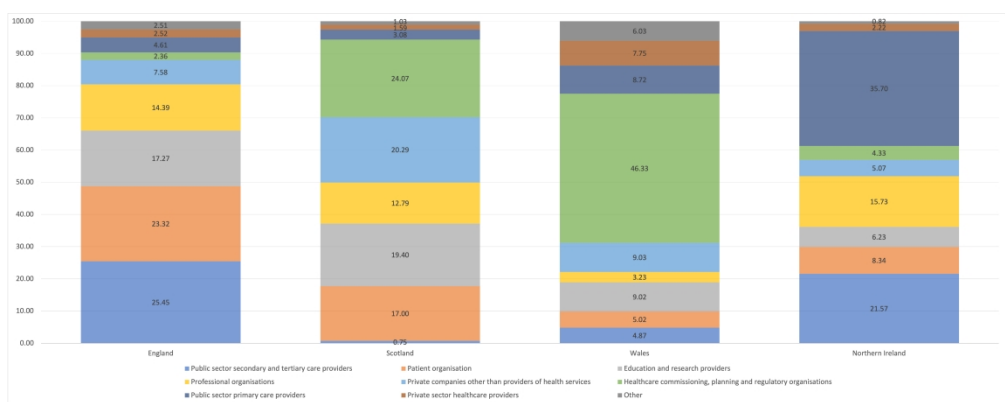

Percentage of payments to recipient types per country

541x213mm (300 x 300 DPI)

1  
2  
3  
4  
5  
6  
7  
8  
9  
10  
11  
12  
13  
14  
15  
16  
17  
18  
19  
20  
21  
22  
23  
24  
25  
26  
27  
28  
29  
30  
31  
32  
33  
34  
35  
36  
37  
38  
39  
40  
41  
42  
43  
44  
45  
46  
47  
48  
49  
50  
51  
52  
53  
54  
55  
56  
57  
58  
59  
60

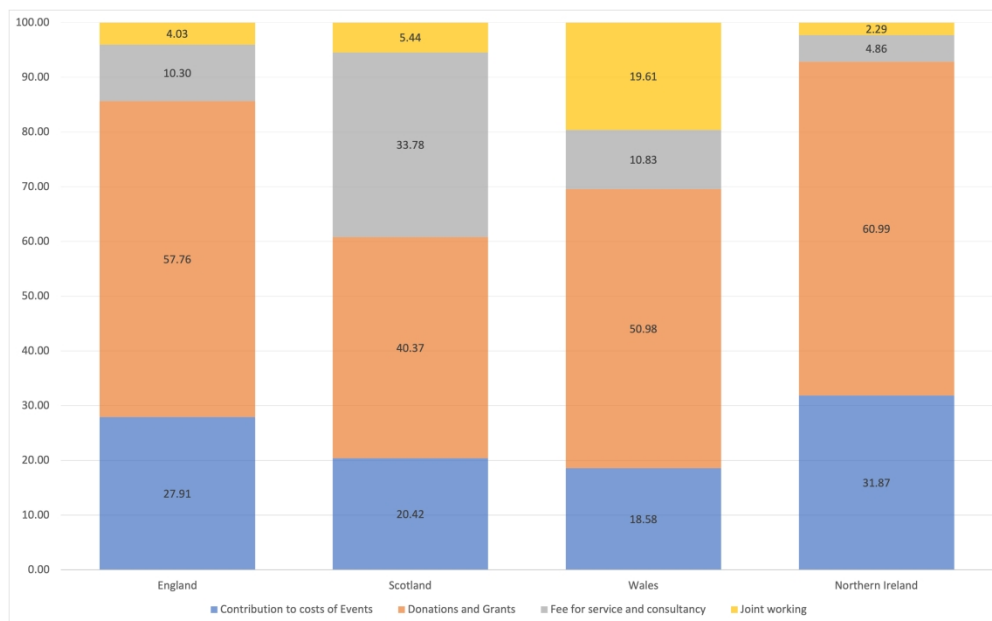

Percentage of total value for each payment type

346x214mm (300 x 300 DPI)

## Supplementary file contents:

| <b>Supplementary File</b>                                                                                                   | <b>Page</b> |
|-----------------------------------------------------------------------------------------------------------------------------|-------------|
| Supplementary File 1. Payment types included in Disclosure UK and patient organisation codes applied to Disclosure UK codes | 2           |
| Supplementary File 2. Data integration flowchart                                                                            | 3           |
| Supplementary File 3. Recipient category descriptions and examples                                                          | 4-5         |
| Supplementary File 4. Top 10% of donors in each country                                                                     | 6           |
| Supplementary File 5. Visualised networks for England (a), Scotland (b), Wales (c), Northern Ireland (d)                    | 7-10        |
| Supplementary File 6. Top ten companies by degree centrality scores in each country                                         | 11          |
| Supplementary File 7. Descriptive statistics for each recipient category                                                    | 12-14       |
| Supplementary File 8. Top 10 recipients in each country                                                                     | 15-16       |
| Supplementary File 9. Post-hoc Bonferroni pairwise comparisons between countries of payments per category                   | 17-19       |
| Supplementary File 10. Post-hoc Bonferroni pairwise comparisons between countries of payment types                          | 20          |

Supplementary File 1. Payment types included in Disclosure UK and patient organisation codes applied to Disclosure UK codes

| Payment type                    | Description of payment type                                                                                                                                                                                                                                                                                                                                                                                                                           | Patient organisation payments subsumed within the payment type                                                                                                                                         |
|---------------------------------|-------------------------------------------------------------------------------------------------------------------------------------------------------------------------------------------------------------------------------------------------------------------------------------------------------------------------------------------------------------------------------------------------------------------------------------------------------|--------------------------------------------------------------------------------------------------------------------------------------------------------------------------------------------------------|
| Contribution to costs of Events | <p>Contribution to costs related to Events, through HCOs or Third Parties, including support to HCPs to attend Events, such as:</p> <ul style="list-style-type: none"> <li>• Registration fees;</li> <li>• Sponsorship agreements with HCOs or with Third Parties appointed by an HCO to manage an Event; and</li> <li>• Travel and accommodation (EFPIA Code of Practice 2019, p. 30)</li> </ul>                                                     | contributions to costs of events organised by recipients or third parties; travel, accommodation and registration fees                                                                                 |
| Donations and Grants to HCOs    | <p>Donations and Grants to HCOs that support healthcare, including donations and grants (either cash or benefits in kind) to institutions, organisations or associations that are comprised of HCPs and/or that provide healthcare (EFPIA Code of Practice 2019, p. 30)</p>                                                                                                                                                                           | donations; grants; corporate member, supporter, sponsor or partner; purchases and subscriptions from patient organisations; more than one distinct payment form; form of funding unclear; sponsorships |
| Fee for service and consultancy | <p>Payments resulting from or related to contracts between Member Companies and HCOs under which such HCOs provide any type of services to a Member Company or any other type of funding not covered in the previous categories. Fees, on the one hand, and on the other hand payments relating to expenses agreed in the written agreement covering the activity will be disclosed as two separate amounts. (EFPIA Code of Practice 2019, p. 30)</p> | fees for service and consultancy (including travel and accommodation); support, help and contributions                                                                                                 |
| Joint working                   | <p>The Department of Health defines joint working between the NHS and the pharmaceutical industry as situations where, for the benefit of patients, one or more pharmaceutical companies and the NHS pool skills, experience and/or resources for the joint development and implementation of patient centred projects and share a commitment to successful delivery. (ABPI Code of Practice 2015, Clause 20, p. 30)</p>                              | n/a                                                                                                                                                                                                    |

## Supplementary File 2. Data integration flowchart

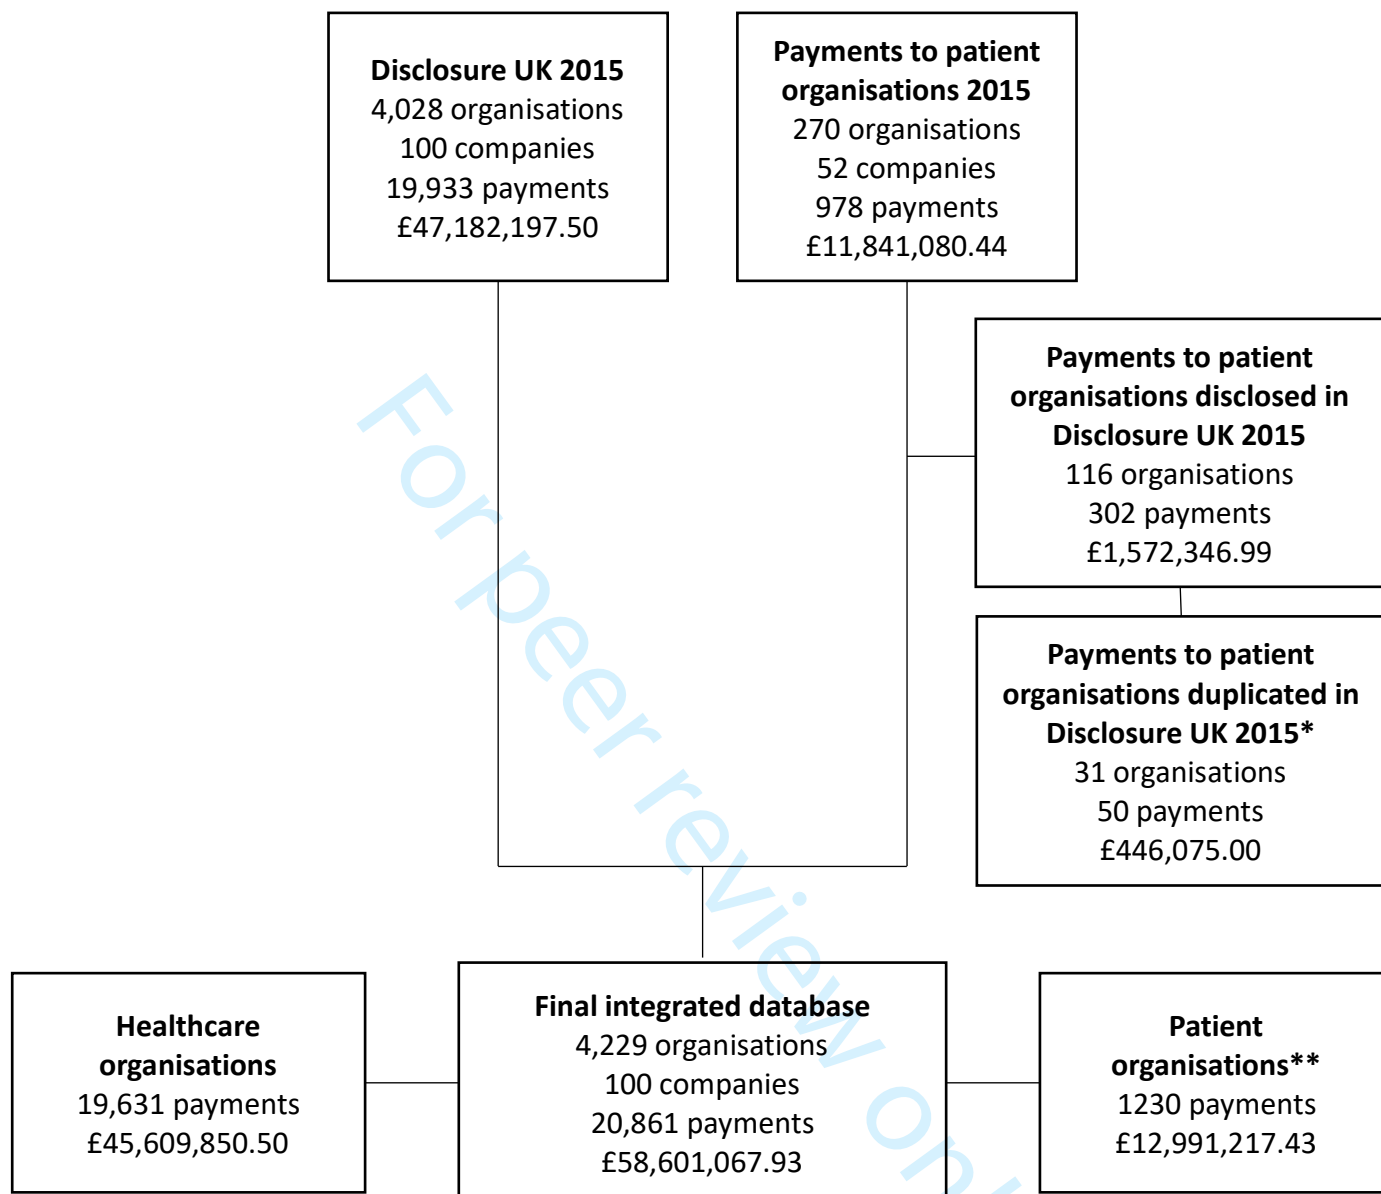

\*This is the number and value of payments excluded to ensure no payment was counted twice

\*\*During the cleaning process, a number of considerations took place to determine the final number and value of payments to patient organisations. Some duplicate payments were identified that were reported as multiple payments in one dataset and one payment in the other dataset (influencing the final number of payments). Approaches to VAT when reporting values also differed between the two datasets (influencing the final value of payments).

## Supplementary File 3. Recipient category descriptions and examples

| Recipient category                                                                                                                             | Category description                                                                                                                    | Examples (country-specific examples where applicable)                                                                                                                                                                                                                                                                                                                                                                                                                                                                                                                                                                                                                                                                   |
|------------------------------------------------------------------------------------------------------------------------------------------------|-----------------------------------------------------------------------------------------------------------------------------------------|-------------------------------------------------------------------------------------------------------------------------------------------------------------------------------------------------------------------------------------------------------------------------------------------------------------------------------------------------------------------------------------------------------------------------------------------------------------------------------------------------------------------------------------------------------------------------------------------------------------------------------------------------------------------------------------------------------------------------|
| Alternative providers of health services                                                                                                       | Charities, not-for-profit companies, social enterprises and community interest companies providing health services                      | <ul style="list-style-type: none"> <li>- social enterprise delivering primary or secondary care health services</li> <li>- nursing or care home run by a community interest company (CIC)</li> <li>- hospital, hospice, or nursing home with a charitable status</li> </ul>                                                                                                                                                                                                                                                                                                                                                                                                                                             |
| Education and research providers                                                                                                               | Universities, charities, and noncommercial institutes undertaking research                                                              | <ul style="list-style-type: none"> <li>- university</li> <li>- research institute at a NHS organisation</li> <li>- charity focusing on undertaking medical research</li> </ul>                                                                                                                                                                                                                                                                                                                                                                                                                                                                                                                                          |
| Formal bodies representing healthcare professionals or patients                                                                                | Local medical, optical, optometric, or pharmaceutical committees and statutory bodies representing healthcare professionals or patients | <ul style="list-style-type: none"> <li>- local medical committees (LMC)</li> <li>- local optical or optometric committee (LOC)</li> </ul> <p><i>England</i></p> <ul style="list-style-type: none"> <li>- local pharmaceutical committee (LPC)</li> </ul>                                                                                                                                                                                                                                                                                                                                                                                                                                                                |
| Charities and other third-sector organisations (excluding providers of health services, professional organisations, and patient organisations) | Organisations (not patient organisations) focusing on education, research, advocacy, and multipurpose organisations                     | <ul style="list-style-type: none"> <li>- charitable trusts providing medical education events to healthcare professionals</li> <li>- think tanks</li> <li>- third-sector organisation (non-charity) or charity focused on funding medical research</li> <li>- research institute registered as a charitable organisation</li> </ul>                                                                                                                                                                                                                                                                                                                                                                                     |
| Healthcare commissioning, planning and regulatory organisations                                                                                | Local, regional, and commissioning, planning, or regulatory organisations                                                               | <ul style="list-style-type: none"> <li>- primary care trust (PCT)</li> <li>- NHS Shared Business Services</li> <li>- National Institute for Health and Care Excellence (NICE)</li> <li>- Public Health England</li> </ul> <p><i>England</i></p> <ul style="list-style-type: none"> <li>- clinical commissioning group</li> <li>- Locality group</li> <li>- area prescribing committee</li> <li>- local commissioning group</li> <li>- NHS England</li> </ul> <p><i>Scotland</i></p> <ul style="list-style-type: none"> <li>- regional NHS board</li> <li>- area pharmaceutical committee</li> </ul> <p><i>Wales</i></p> <ul style="list-style-type: none"> <li>- health board</li> <li>- public health Wales</li> </ul> |



|                                                           |                                                                                                                                            |                                                                                                                                                                                                                                                                                                                                                                                                                |
|-----------------------------------------------------------|--------------------------------------------------------------------------------------------------------------------------------------------|----------------------------------------------------------------------------------------------------------------------------------------------------------------------------------------------------------------------------------------------------------------------------------------------------------------------------------------------------------------------------------------------------------------|
|                                                           |                                                                                                                                            | <p><i>Northern Ireland</i></p> <ul style="list-style-type: none"> <li>- health and social care board</li> <li>- local commissioning group</li> </ul>                                                                                                                                                                                                                                                           |
| Patient organisations                                     | Organisations focusing on supporting education, research, advocacy, and multipurpose organisations                                         | <ul style="list-style-type: none"> <li>- multipurpose patient organisations</li> <li>- organisations focused on providing patient support</li> <li>- hospital charities</li> </ul>                                                                                                                                                                                                                             |
| Private companies other than providers of health services | Providers of medical communications or training services, commercial or medical research services, and accountancy or consultancy services | <ul style="list-style-type: none"> <li>- manufacturer or supplier of medical devices or technologies</li> <li>- pharmacy wholesaler or distributor</li> <li>- event management services</li> <li>- journal or publishing company</li> <li>- clinical or contract research organisation</li> <li>- private laboratory</li> </ul>                                                                                |
| Private sector healthcare providers                       | Private clinics and hospitals, healthcare groups, and providers of dental, pharmacy, and optical services                                  | <ul style="list-style-type: none"> <li>- dental practice</li> <li>- pharmacy or chemist</li> <li>- opticians</li> <li>- private clinic, surgery, practice, or hospital</li> <li>- private company providing community health or social care services</li> </ul>                                                                                                                                                |
| Professional organisations                                | Organisations of medical professionals, other healthcare professionals, or non-healthcare professionals,                                   | <ul style="list-style-type: none"> <li>- organisation of medical professionals</li> <li>- professional bodies responsible for setting standards of care and education for medical specialities</li> <li>- royal college - medical professionals</li> <li>- alliance or coalition of professional associations or groups</li> <li>- professional organisation of pharmacists or pharmacy technicians</li> </ul> |
| Public administration and providers of public services    | Central UK government bodies, devolved administrations in Scotland, Wales, and Northern Ireland, and local authorities                     | <ul style="list-style-type: none"> <li>- district, city, county, or borough council</li> <li>- prison</li> <li>- devolved administrations</li> <li>- central government bodies</li> </ul>                                                                                                                                                                                                                      |
| Public sector primary care providers                      | General practitioner surgeries, medical practice centres, groups of surgeries or medical practices, and healthcare or medical groups       | <ul style="list-style-type: none"> <li>- GP practice, surgery, medical practice or family practice</li> <li>- health centre, medical centre or primary care centre</li> <li>- group of surgeries or medical practices</li> </ul>                                                                                                                                                                               |
| Public sector secondary and tertiary care providers       | NHS trusts, NHS hospitals, and networks and collaboratives of NHS organisations                                                            | <ul style="list-style-type: none"> <li>- NHS hospital</li> <li>- NHS Foundation Trust</li> <li>- NHS trust</li> <li>- strategic clinical network (SCN)</li> </ul> <p><i>Scotland</i></p> <ul style="list-style-type: none"> <li>- managed clinical network (MCN)</li> </ul>                                                                                                                                    |

## Supplementary File 4. Top 10% of donors in each country

| Country          | Company (revenue ranking) | Payment value - £ (%) | Payments – n (%) |
|------------------|---------------------------|-----------------------|------------------|
| England          | Pfizer (2)                | 5,292,130.74 (10.09)  | 1636 (8.99)      |
|                  | Novartis (7)              | 3,564,500.43 (6.80)   | 460 (2.53)       |
|                  | Bayer (8)                 | 3,476,304.44 (6.63)   | 2110 (11.60)     |
|                  | GlaxoSmithKline (4)       | 3,291,496.35 (6.28)   | 1076 (5.92)      |
|                  | AstraZeneca (1)           | 2,779,000.54 (5.30)   | 1279 (7.03)      |
|                  | Janssen-Cilag (10)        | 2,387,242.64 (4.55)   | 722 (3.97)       |
|                  | UCB Pharma (30)           | 2,204,967.90 (4.20)   | 74 (0.41)        |
|                  | Astellas Pharma (21)      | 2,044,050.60 (3.90)   | 311 (1.71)       |
|                  | Roche (5)                 | 1,931,651.77 (3.68)   | 173 (0.95)       |
|                  | Biogen Idec (23)          | 1,886,879.26 (3.60)   | 83 (0.46)        |
|                  | Top 10% total             | 28,858,224.67 (55.03) | 7924 (43.56)     |
| Scotland         | Biogen Idec (24)          | 733,104.05 (20.09)    | 7 (0.51)         |
|                  | Takeda UK (38)            | 274,952.71 (7.53)     | 25 (1.82)        |
|                  | Pfizer (2)                | 250,859.45 (6.87)     | 143 (10.44)      |
|                  | Bayer (8)                 | 215,930.76 (5.92)     | 164 (11.97)      |
|                  | Novartis (7)              | 199,703.97 (5.47)     | 48 (3.50)        |
|                  | Bristol-Myers Squibb (23) | 183,959.00 (5.04)     | 51 (3.72)        |
|                  | AstraZeneca (1)           | 178,848.49 (4.90)     | 75 (5.47)        |
|                  | Top 10% total             | 2,037,358.42 (55.82)  | 513 (37.45)      |
| Wales            | Pfizer (2)                | 284,719.57 (14.32)    | 102 (10.30)      |
|                  | Roche (5)                 | 230,090.90 (11.58)    | 10 (1.01)        |
|                  | Novartis (7)              | 177,069.59 (8.91)     | 36 (3.64)        |
|                  | AstraZeneca (1)           | 148,288.67 (7.46)     | 79 (7.98)        |
|                  | Janssen-Cilag (10)        | 122,237.44 (6.15)     | 22 (2.22)        |
|                  | Biogen (24)               | 112,428.62 (5.66)     | 7 (0.71)         |
|                  | Top 10% total             | 1,074,834.80 (54.07)  | 256 (25.86)      |
| Northern Ireland | Sanofi Aventis (13)       | 92,252.80 (17.81)     | 24 (7.72)        |
|                  | Pfizer (2)                | 86,639.31 (16.73)     | 45 (14.47)       |
|                  | Napp Pharmaceuticals (29) | 83,252.29 (16.07)     | 45 (14.47)       |
|                  | Bayer (8)                 | 37,959.50 (7.33)      | 75 (24.12)       |
|                  | Top 10% total             | 300,103.90 (57.94)    | 189 (60.77)      |

\*Value as proportion of all payments in each country

Supplementary File 5. Visualised networks for England (a), Scotland (b), Wales (c), Northern Ireland (d)

Supplementary File 5a. England's network

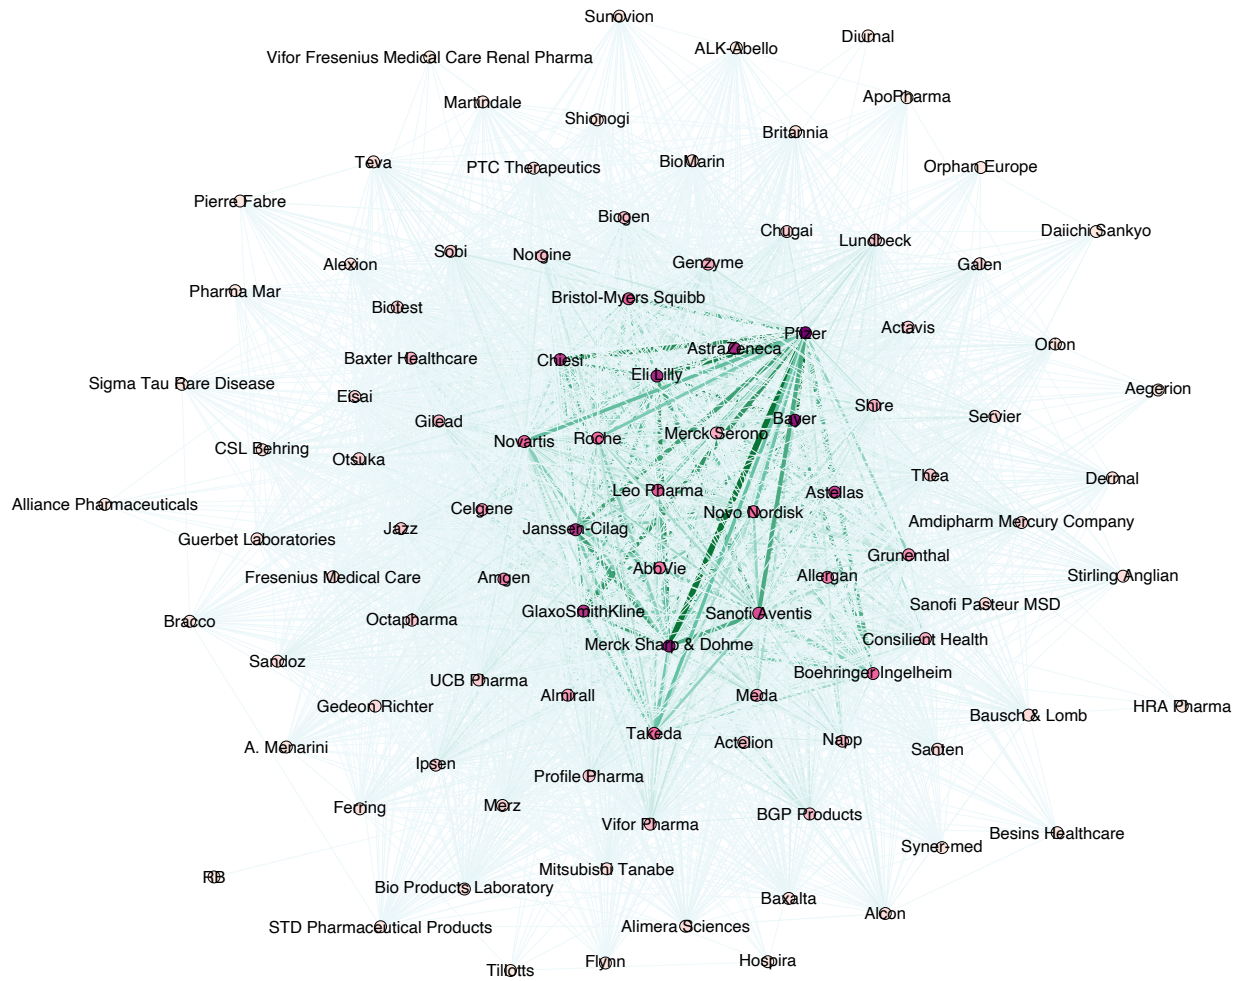

Supplementary File 5b. Scotland's network

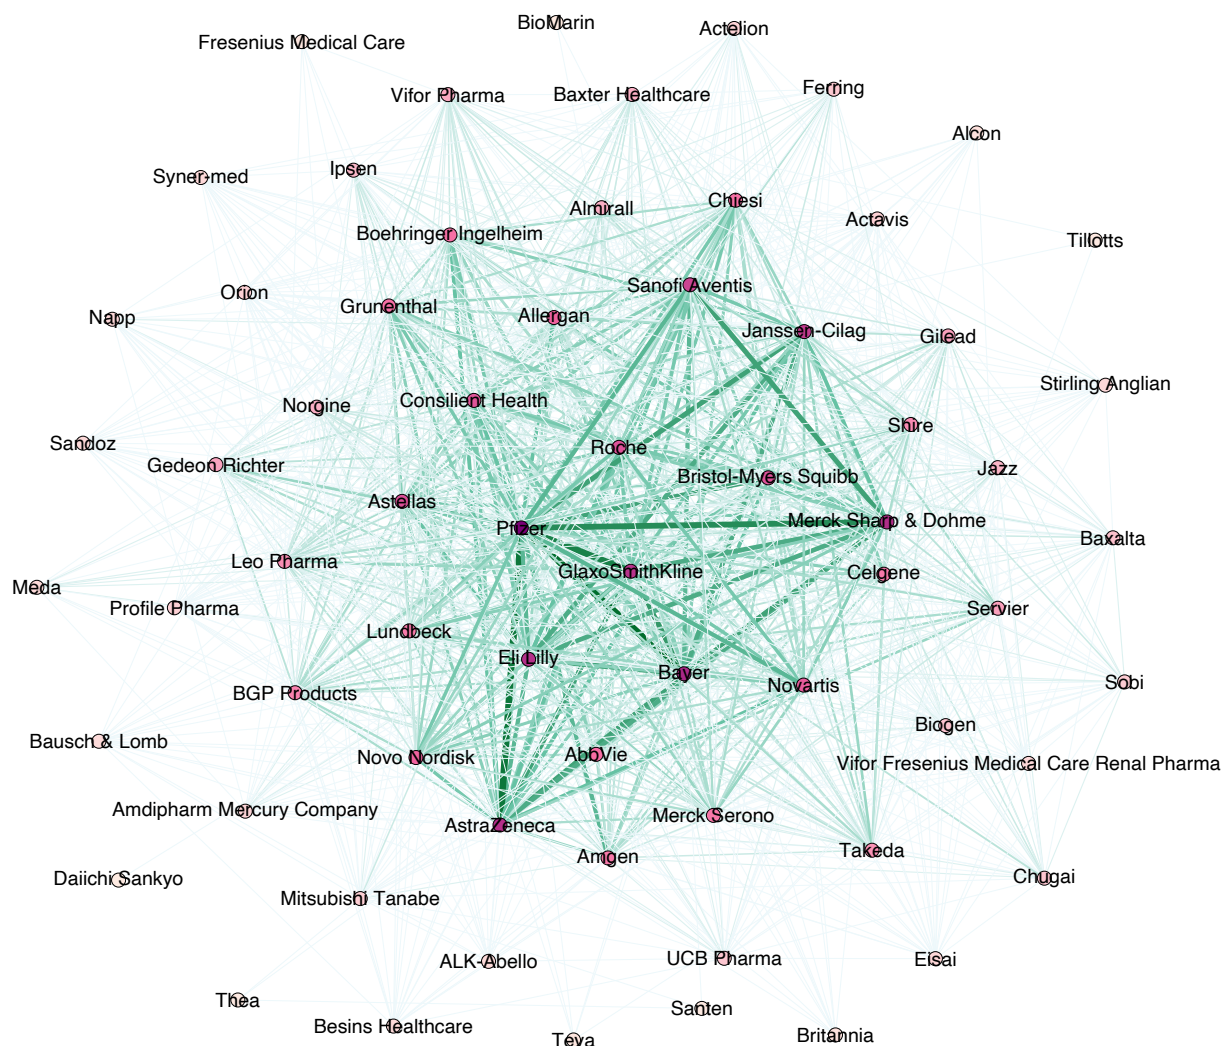

Supplementary File 5c. Wales' network

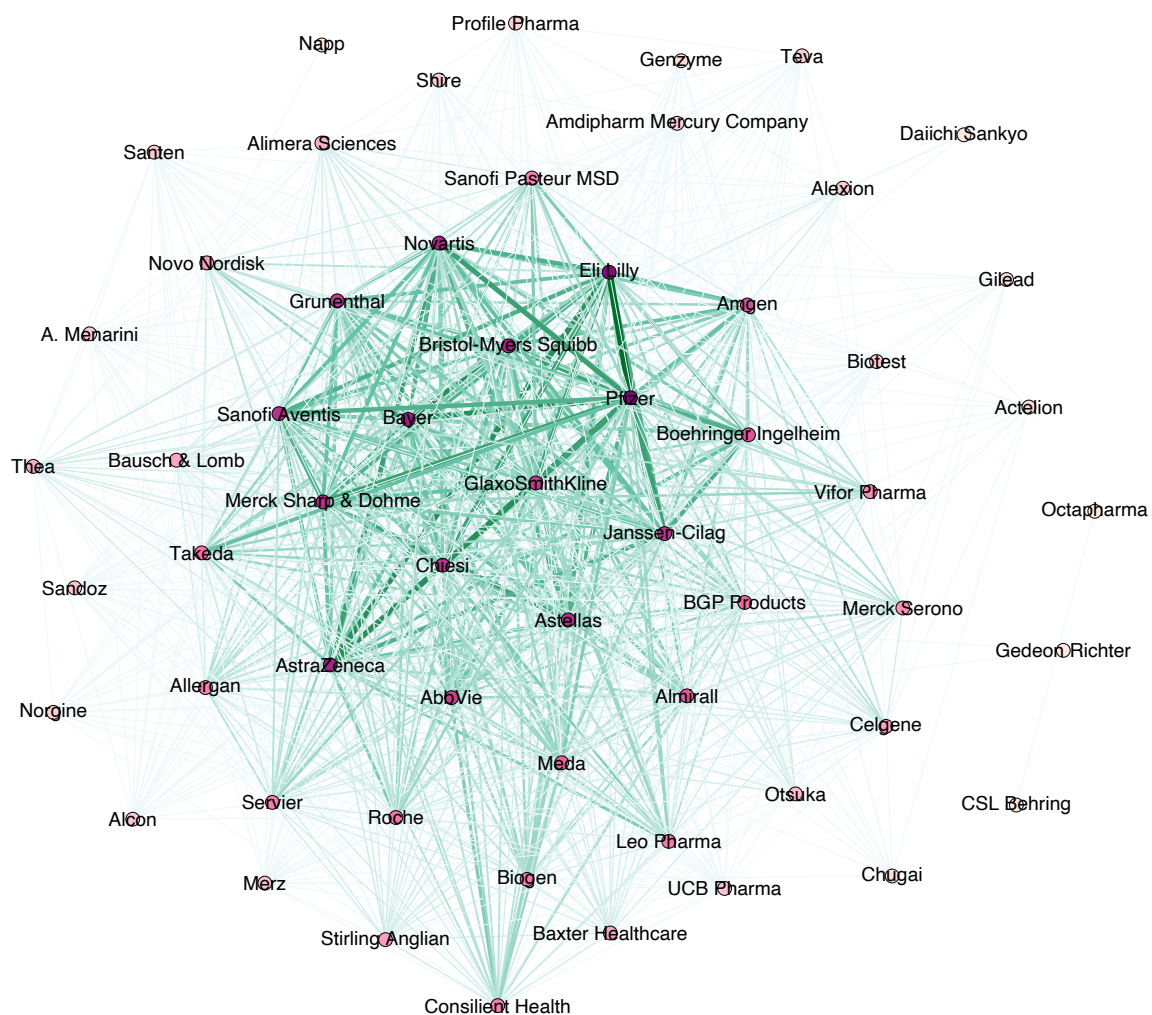

only

Supplementary File 5d. Northern Ireland's network

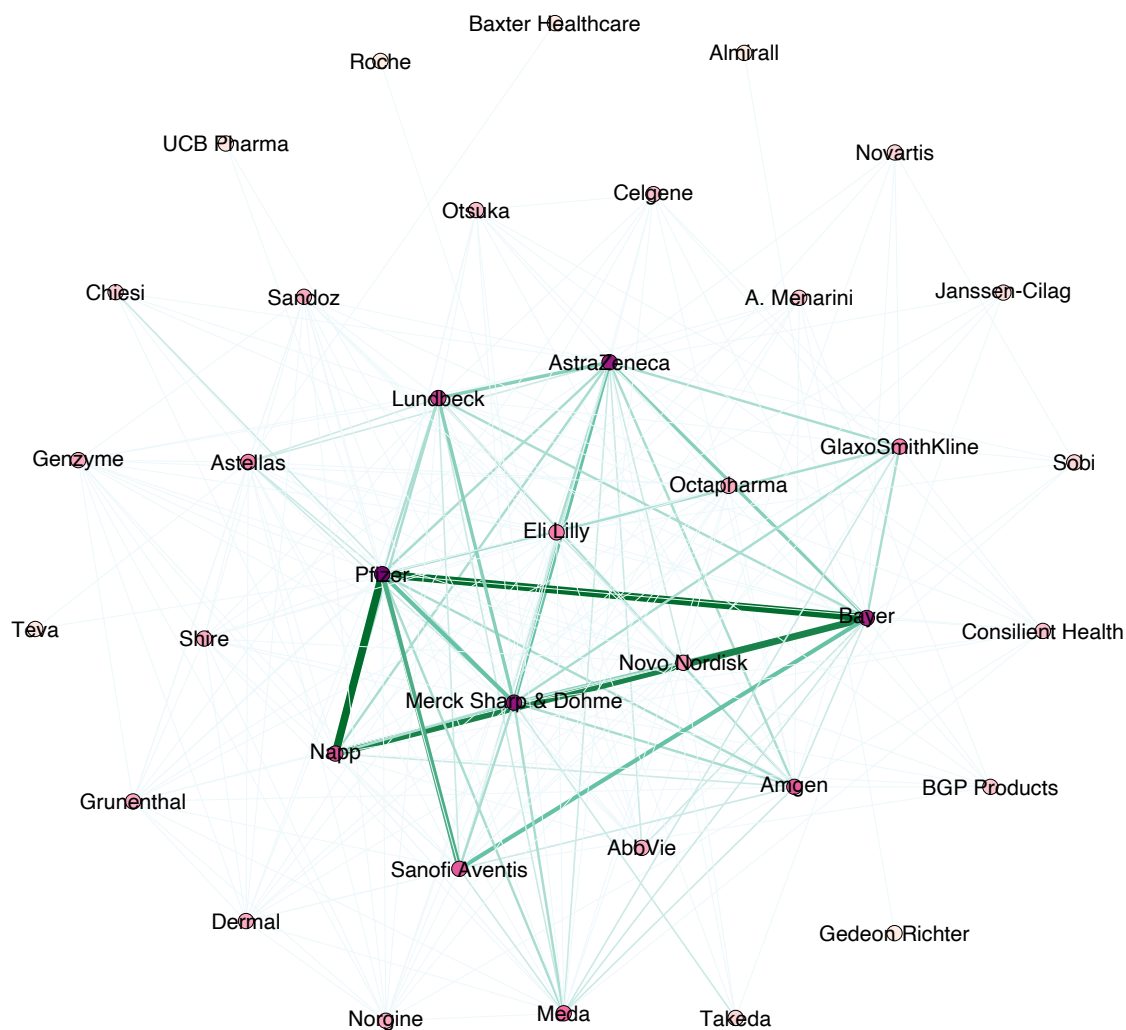

Note. All networks were visualised in Gephi v 0.9.2. Node label size and darkness corresponds to the weighted degree centrality of each company; the size and darkness of the edges (connecting lines) correspond to the number of shared recipients between companies

Supplementary File 6. Top ten companies by degree centrality scores in each country

| England                 |        | Scotland                  |        | Wales                     |        | Northern Ireland          |        |
|-------------------------|--------|---------------------------|--------|---------------------------|--------|---------------------------|--------|
| Company                 | Degree | Company                   | Degree | Company                   | Degree | Company                   | Degree |
| Pfizer (2)              | 3394   | Pfizer (2)                | 319    | Pfizer (2)                | 206    | Pfizer (2)                | 63     |
| Merck Sharp & Dohme (6) | 3064   | Bayer (8)                 | 260    | Eli Lilly (3)             | 196    | Merck Sharp & Dohme (6)   | 57     |
| Bayer (8)               | 3060   | Merck Sharp & Dohme (6)   | 251    | Bayer (8)                 | 176    | AstraZeneca (1)           | 55     |
| AstraZeneca (1)         | 2755   | AstraZeneca (1)           | 245    | AstraZeneca (1)           | 171    | Bayer (8)                 | 52     |
| Eli Lilly (3)           | 2741   | Eli Lilly (3)             | 245    | Bristol-Myers Squibb (23) | 169    | Lundbeck (64)             | 43     |
| Janssen-Cilag (10)      | 2539   | GlaxoSmithKline (4)       | 241    | Novartis (7)              | 168    | Napp Pharmaceuticals (29) | 39     |
| GlaxoSmithKline (4)     | 2531   | Janssen-Cilag (10)        | 227    | Merck Sharp & Dohme (6)   | 161    | Amgen (19)                | 36     |
| Astellas Pharma (21)    | 2410   | Sanofi Aventis (13)       | 214    | Astellas Pharma (21)      | 160    | Sanofi Aventis (13)       | 36     |
| Chiesi (27)             | 2365   | Astellas Pharma (21)      | 196    | Chiesi (27)               | 158    | Meda Pharma (46)          | 32     |
| Sanofi Aventis (13)     | 2156   | Bristol-Myers Squibb (23) | 193    | Sanofi Aventis (13)       | 156    | Eli Lilly (3)             | 27     |

Note. Numbers in brackets represent company size (revenue ranking)

Supplementary File 7. Descriptive statistics for each recipient type

| England – types of recipient                                    | Value (%)                   | Payments – n (%)    | Median - £ (IQR)           | Recipients – n (%)  | Pharmaceutical companies     |
|-----------------------------------------------------------------|-----------------------------|---------------------|----------------------------|---------------------|------------------------------|
| Public sector secondary and tertiary care providers             | <b>13,349,779.1 (25.56)</b> | <b>6660 (36.87)</b> | 233.17 (141.87 – 500)      | 260 (7.41)          | <b>89</b>                    |
| Patient organisation                                            | 12,227,843.2 (23.41)        | 1141 (6.32)         | <b>4000 (500 – 11,104)</b> | 288 (8.21)          | 65                           |
| Education and research providers                                | 9,055,882.96 (17.34)        | 875 (4.84)          | 1000 (333.34 – 4,798.40)   | 56 (1.60)           | 68                           |
| Professional organisations                                      | 7,545,121.68 (14.44)        | 1776 (9.83)         | 500 (240 – 3,200)          | 354 (10.09)         | 84                           |
| Private companies other than providers of health services       | 3,975,461.63 (7.61)         | 1443 (7.99)         | 300 (196.8 – 598.92)       | 239 (6.81)          | 56                           |
| Public sector primary care providers                            | 2,416,957.98 (4.63)         | 2513 (13.91)        | 434.5 (193.6 – 869)        | <b>1809 (51.55)</b> | 32                           |
| Private sector healthcare providers                             | 1,322,785.04 (2.53)         | 463 (2.56)          | 240 (166 – 588)            | 108 (3.08)          | 44                           |
| Healthcare commissioning, planning and regulatory organisations | 1,235,239.68 (2.36)         | 2166 (11.99)        | 208.17 (160 – 307.2)       | 206 (5.87)          | 47                           |
| Charities and other third-sector organisations                  | 876,822.76 (1.68)           | 366 (2.03)          | 223.52 (157 – 487.2)       | 39 (1.11)           | 40                           |
| Formal bodies representing healthcare professionals or patients | 121,351.93 (0.23)           | 458 (2.54)          | 200 (160 – 259.8)          | 68 (1.94)           | 25                           |
| Alternative providers of health services                        | 93,534.91 (0.18)            | 180 (1.00)          | 200 (160 – 394)            | 62 (1.77)           | 28                           |
| Public administration and providers of public services          | 15,335.25 (0.03)            | 24 (0.13)           | 394.4 (224.45 – 546.67)    | 20 (0.57)           | 10                           |
| <i>All payments</i>                                             | <i>52,445,615.48</i>        | <i>18065</i>        | <i>280 (160 – 827.75)</i>  | <i>3509</i>         | <i>100</i>                   |
| Scotland - types of recipient                                   | Value (%)                   | Payments - n (%)    | Median - £ (IQR)           | Recipients - n (%)  | Pharmaceutical companies (%) |
| Healthcare commissioning, planning and regulatory organisations | <b>878,333.57 (24.13)</b>   | <b>582 (43.30)</b>  | 240 (131.18 - 500)         | 22 (8.30)           | <b>53 (73.61)</b>            |
| Private companies other than providers of health services       | 740,694.09 (20.35)          | 25 (1.86)           | 1,200 (350 - 5,528.88)     | 11 (4.15)           | 13 (18.06)                   |
| Education and research providers                                | 708,149.16 (19.46)          | 141 (10.49)         | 1152 (400 – 2,880)         | 8 (3.02)            | 41 (56.94)                   |
| Patient organisation                                            | 620,384.33 (17.05)          | 52 (3.87)           | 1000 (253.68 - 9,745)      | 14 (5.28)           | 19 (26.39)                   |
| Professional organisations                                      | 466,833.11 (12.83)          | 291 (21.65)         | 450 (285.67 - 980)         | 64 (24.15)          | 52 (72.22)                   |



|                                                                 |                               |                         |                                 |                           |                                     |
|-----------------------------------------------------------------|-------------------------------|-------------------------|---------------------------------|---------------------------|-------------------------------------|
| Public sector primary care providers                            | 112,308.91<br>(3.09)          | 128<br>(9.52)           | 434.5 (202.23 -<br>651,75)      | <b>113<br/>(42.64)</b>    | 13 (18.06)                          |
| Private sector healthcare providers                             | 58,091.76<br>(1.60)           | 69 (5.13)               | 647.54 (206.65-<br>1,500)       | 11 (4.15)                 | 9 (12.50)                           |
| Public sector secondary and tertiary care providers             | 27,392.82<br>(0.75)           | 39 (2.90)               | 300 (189.75 -<br>612)           | 12 (4.53)                 | 11 (15.28)                          |
| Charities and other third-sector organisations                  | 19,710 (0.54)                 | 4 (0.30)                | <b>1700 (377.5 -<br/>6,250)</b> | 2 (0.75)                  | 4 (5.56)                            |
| Alternative providers of health services                        | 4,580 (0.13)                  | 6 (0.45)                | 700 (360 - 1,100)               | 4 (1.51)                  | 4 (5.56)                            |
| Public administration and providers of public services          | 2,700 (0.07)                  | 5 (0.37)                | 540 (200 - 600)                 | 3 (1.13)                  | 5 (6.94)                            |
| Formal bodies representing healthcare professionals or patients | 427.2 (0.01)                  | 2 (0.15)                | 213.6 (211.4 -<br>214.8)        | 1 (0.38)                  | 1 (1.39)                            |
| <i>All payments</i>                                             | <i>3,649,749.43</i>           | <i>1,344</i>            | <i>400 (180 - 864)</i>          | <i>265</i>                | <i>72</i>                           |
| <b>Wales - types of recipient</b>                               | <b>Value (%)</b>              | <b>Payments - n (%)</b> | <b>Median - £ (IQR)</b>         | <b>Recipients - n (%)</b> | <b>Pharmaceutical companies (%)</b> |
| Healthcare commissioning, planning and regulatory organisations | <b>920,980.22<br/>(46.38)</b> | <b>557<br/>(56.61)</b>  | 225 (114.24 -<br>486.39)        | 10 (4.72)                 | <b>50 (78.13)</b>                   |
| Private companies other than providers of health services       | 179,495.4<br>(9.04)           | 56 (5.69)               | <b>1475 (216 -<br/>6,600)</b>   | 10 (4.72)                 | 8 (12.50)                           |
| Education and research providers                                | 179,256.38<br>(9.03)          | 37 (3.76)               | 336 (175.2 -<br>1000)           | 5 (2.36)                  | 16 (25.00)                          |
| Public sector primary care providers                            | 173,268.30<br>(8.73)          | 141<br>(14.33)          | 800 (434.5 -<br>1,152)          | <b>118<br/>(55.66)</b>    | 15 (23.44)                          |
| Private sector healthcare providers                             | 153,983.36<br>(7.76)          | 18 (1.83)               | 440 (360.94 -<br>1,732)         | 6 (2.83)                  | 9 (14.06)                           |
| Public administration and providers of public services          | 108,000<br>(5.44)             | 1 (0.10)                | -                               | 1 (0.47)                  | 1 (1.56)                            |
| Patient organisation                                            | 99,784.32<br>(5.03)           | 22 (2.24)               | 747.93 (500 -<br>2,000)         | 10 (4.72)                 | 11 (17.19)                          |
| Public sector secondary and tertiary care providers             | 96,862.66<br>(4.88)           | 20 (2.03)               | 253.66 (200 -<br>954)           | 3 (1.42)                  | 13 (20.31)                          |
| Professional organisations                                      | 64,181.82<br>(3.23)           | 88 (8.94)               | 400 (280 - 800)                 | 38 (17.92)                | 31 (48.44)                          |
| Charities and other third-sector organisations                  | 5,036.8 (0.25)                | 17 (1.73)               | 120 (120 - 180)                 | 4 (1.89)                  | 7 (10.94)                           |
| Formal bodies representing healthcare professionals or patients | 4,679.37<br>(0.24)            | 27 (2.74)               | 120 (96 - 142)                  | 7 (3.30)                  | 11 (17.19)                          |
| <i>All payments</i>                                             | <i>1,987,702.62</i>           | <i>984</i>              | <i>300 (144 - 800)</i>          | <i>212</i>                | <i>64</i>                           |

| <b>Northern Ireland - types of recipient</b>                    | <b>Value (%)</b>          | <b>Payments - n (%)</b> | <b>Median - £ (IQR)</b>             | <b>Recipients - n (%)</b> | <b>Pharmaceutical companies (%)</b> |
|-----------------------------------------------------------------|---------------------------|-------------------------|-------------------------------------|---------------------------|-------------------------------------|
| Public sector primary care providers                            | <b>184,903.09 (35.72)</b> | <b>127 (40.97)</b>      | 600 (434.5 - 1,600)                 | <b>94 (60.65)</b>         | 6 (14.29)                           |
| Public sector secondary and tertiary care providers             | 111,743.45 (21.59)        | 83 (26.77)              | 288 (163.4 - 490.13)                | 5 (3.23)                  | <b>27 (64.29)</b>                   |
| Professional organisations                                      | 81,489.7 (15.74)          | 34 (10.97)              | 600 (320 - 1,784)                   | 21 (13.55)                | 21 (50.00)                          |
| Patient organisation                                            | 43,205.6 (8.35)           | 15 (4.84)               | 650 (600 - 1,450)                   | 7 (4.52)                  | 14 (33.33)                          |
| Education and research providers                                | 32,258 (6.23)             | 10 (3.23)               | 1100 (873.75 - 3525)                | 1 (0.65)                  | 7 (16.67)                           |
| Private companies other than providers of health services       | 26,242.77 (5.07)          | 6 (1.94)                | <b>4179.38 (1,152.19 - 7,687.5)</b> | 4 (2.58)                  | 3 (7.14)                            |
| Healthcare commissioning, planning and regulatory organisations | 22,447.6 (4.34)           | 7 (2.26)                | 1500 (470.8 - 4,087)                | 4 (2.58)                  | 6 (14.29)                           |
| Private sector healthcare providers                             | 11,476.85 (2.22)          | 23 (7.42)               | 38.49 (28.9 - 485)                  | 16 (10.32)                | 6 (14.29)                           |
| Formal bodies representing healthcare professionals or patients | 2,133.34 (0.41)           | 2 (0.65)                | 1066.67 (933.33 - 1200.00)          | 1 (0.65)                  | 1 (2.38)                            |
| Alternative providers of health services                        | 1,700 (0.33)              | 3 (0.97)                | 600 (550 - 600)                     | 2 (1.29)                  | 2 (4.76)                            |
| <i>All payments</i>                                             | <i>517,600.40</i>         | <i>310</i>              | <i>475.2 (217.25 - 1,357.47)</i>    | <i>155</i>                | <i>42</i>                           |

Supplementary File 8. Top 10 recipients in each country

| Country  | Recipient                          | Type of recipient                                               | Value - £    | Payments - n | Companies - n |
|----------|------------------------------------|-----------------------------------------------------------------|--------------|--------------|---------------|
| England  | King's College London              | Education and research providers                                | 2,572,086.51 | 45           | 18            |
|          | Bladder and Bowel Foundation       | Patient organisation                                            | 1,459,371.52 | 11           | 1             |
|          | London School Hyg and Tropical Med | Education and research providers                                | 935,025.98   | 16           | 6             |
|          | PeerVoice                          | Private companies other than providers of health services       | 930,028.30   | 11           | 3             |
|          | University College London          | Education and research providers                                | 907,256.40   | 96           | 36            |
|          | Diabetes UK - England              | Patient organisation                                            | 888,845.00   | 41           | 7             |
|          | Healthcare At Home                 | Private sector healthcare providers                             | 872,740.81   | 18           | 2             |
|          | Cancer Research UK                 | Patient organisation                                            | 804,543.76   | 19           | 9             |
|          | Central Manchester Univ Hosps FT   | Public sector secondary and tertiary care providers             | 739,595.97   | 108          | 37            |
|          | British Society for Rheumatology   | Professional organisations                                      | 543,012.33   | 31           | 14            |
| Scotland | Quintiles - Scotland               | Private companies other than providers of health services       | 682,601.65   | 5            | 1             |
|          | Myeloma UK                         | Patient organisation                                            | 521,574.36   | 12           | 7             |
|          | NHS Greater Glasgow and Clyde      | Healthcare commissioning, planning and regulatory organisations | 483,354.99   | 153          | 34            |
|          | University of Glasgow              | Education and research providers                                | 442,707.63   | 70           | 26            |
|          | University of Dundee               | Education and research providers                                | 160,632.40   | 20           | 11            |
|          | NHS Lothian                        | Healthcare commissioning, planning and regulatory organisations | 144,175.05   | 73           | 25            |
|          | University of Edinburgh            | Education and research providers                                | 73,014.39    | 37           | 21            |
|          | NHS Tayside                        | Healthcare commissioning, planning and regulatory organisations | 67,924.08    | 74           | 24            |
|          | NHS Ayrshire and Arran             | Healthcare commissioning, planning and regulatory organisations | 63,276.93    | 48           | 25            |
|          | Digestive Disorders Federation     | Professional organisations                                      | 60,796.00    | 2            | 2             |
| Wales    | Cardiff and Vale University HB     | Healthcare commissioning, planning and regulatory organisations | 344,131.95   | 89           | 28            |

|                  |                                                                               |                                                                 |            |     |    |
|------------------|-------------------------------------------------------------------------------|-----------------------------------------------------------------|------------|-----|----|
|                  | Abertawe Bro Morgannwg Univ HB                                                | Healthcare commissioning, planning and regulatory organisations | 242,418.82 | 124 | 32 |
|                  | LloydsPharmacy                                                                | Private sector healthcare providers                             | 146,376.00 | 4   | 1  |
|                  | University of Cardiff                                                         | Education and research providers                                | 120,822.78 | 27  | 13 |
|                  | Bluebay Medical Systems                                                       | Private companies other than providers of health services       | 116,900.00 | 26  | 1  |
|                  | Hywel Dda University HB                                                       | Healthcare commissioning, planning and regulatory organisations | 115,600.62 | 77  | 27 |
|                  | National Assembly for Wales                                                   | Public administration and providers of public services          | 108,000.00 | 1   | 1  |
|                  | Betsi Cadwaladr University HB                                                 | Healthcare commissioning, planning and regulatory organisations | 101,352.58 | 76  | 21 |
|                  | Cwm Taf University Health Board                                               | Healthcare commissioning, planning and regulatory organisations | 84,624.15  | 119 | 25 |
|                  | Velindre NHS Trust                                                            | Public sector secondary and tertiary care providers             | 80,629.32  | 18  | 13 |
| Northern Ireland | Belfast Health and SC Trust                                                   | Public sector secondary and tertiary care providers             | 60,615.65  | 30  | 17 |
|                  | Federation Of Family Practices                                                | Public sector primary care providers                            | 40,235.20  | 3   | 3  |
|                  | UK and Ireland Society of Cataract and Refractive Surgeons - Northern Ireland | Professional organisations                                      | 35,000.00  | 1   | 1  |
|                  | Queen's University Belfast                                                    | Education and research providers                                | 32,258.00  | 10  | 7  |
|                  | Northern Health and SC Trust                                                  | Public sector secondary and tertiary care providers             | 23,703.46  | 14  | 8  |
|                  | Medical Communications                                                        | Private companies other than providers of health services       | 23,250.00  | 3   | 1  |
|                  | Adult ADHD - Northern Ireland                                                 | Patient organisation                                            | 20,000.00  | 1   | 1  |
|                  | Ulster Chemists' Association                                                  | Professional organisations                                      | 16,584.00  | 4   | 3  |
|                  | Western Health and SC Trust                                                   | Public sector secondary and tertiary care providers             | 15,068.55  | 12  | 10 |
|                  | Cancer Focus Northern Ireland                                                 | Patient organisation                                            | 12,255.60  | 2   | 2  |

Supplementary File 9. Post-hoc Bonferroni pairwise comparisons between countries of payments per recipient type

| Recipient type                                      | Group 1 – Group 2*        | Test Statistic | Std. Error | Std. Test Statistic | Sig.  | Adj. Sig <sup>†,‡</sup> | Median (IQR) – group 1 - £ | Median (IQR) – group 2 - £  |
|-----------------------------------------------------|---------------------------|----------------|------------|---------------------|-------|-------------------------|----------------------------|-----------------------------|
| Alternative providers of health services            | England-Scotland          | -59.003        | 22.681     | -2.601              | 0.009 | <b>0.028</b>            | 200 (160 – 394)            | 700 (360 – 1,100)           |
|                                                     | England-Northern Ireland  | -65.919        | 31.816     | -2.072              | 0.038 | 0.115                   | 200 (160 – 394)            | 600 (550 - 600)             |
|                                                     | Scotland-Northern Ireland | 6.917          | 38.645     | 0.179               | 0.858 | 1                       | 700 (360 – 1,100)          | 600 (550 - 600)             |
| Charities and other third-sector organisations      | England-Scotland          | -118.214       | 56.132     | -2.106              | 0.035 | 0.106                   | 223.52 (157 – 487.2)       | <b>1700 (377.5 - 6,250)</b> |
|                                                     | Wales-England             | 79.844         | 27.702     | 2.882               | 0.004 | <b>0.012</b>            | 120 (120 - 180)            | 223.52 (157 – 487.2)        |
|                                                     | Wales-Scotland            | 198.059        | 62.049     | 3.192               | 0.001 | <b>0.004</b>            | 120 (120 - 180)            | <b>1700 (377.5 - 6,250)</b> |
| Education and research providers                    | England-Scotland          | -5.623         | 27.857     | -0.202              | 0.84  | 1                       | 1000 (333.34 – 4,798.40)   | 1152 (400 – 2,880)          |
|                                                     | England-Northern Ireland  | -92.61         | 97.628     | -0.949              | 0.343 | 1                       | 1000 (333.34 – 4,798.40)   | 1100 (873.75 - 3525)        |
|                                                     | Scotland-Northern Ireland | 86.987         | 100.458    | 0.866               | 0.387 | 1                       | 1152 (400 – 2,880)         | 1100 (873.75 - 3525)        |
|                                                     | Wales-England             | 204.193        | 51.523     | 3.963               | <.001 | <b>0</b>                | 336 (175.2 - 1000)         | 1000 (333.34 – 4,798.40)    |
|                                                     | Wales-Scotland            | 209.816        | 56.703     | 3.7                 | <.001 | <b>0.001</b>            | 336 (175.2 - 1000)         | 1152 (400 – 2,880)          |
|                                                     | Wales-Northern Ireland    | 296.803        | 109.409    | 2.713               | 0.007 | <b>0.04</b>             | 336 (175.2 - 1000)         | 1100 (873.75 - 3525)        |
| Formal bodies representing healthcare professionals | England-Scotland          | -46.978        | 99.854     | -0.47               | 0.638 | 1                       | 200 (160 – 259.8)          | 213.6 (211.4 - 214.8)       |
|                                                     | England-Northern Ireland  | -223.228       | 99.854     | -2.236              | 0.025 | 0.152                   | 200 (160 – 259.8)          | 1066.67 (933.33 - 1200.00)  |
|                                                     | Scotland-Northern Ireland | 176.25         | 140.907    | 1.251               | 0.211 | 1                       | 213.6 (211.4 - 214.8)      | 1066.67 (933.33 - 1200.00)  |
|                                                     | Wales-England             | 138.133        | 27.905     | 4.95                | <.001 | <b>0</b>                | 120 (96 - 142)             | 200 (160 – 259.8)           |
|                                                     | Wales-Scotland            | 185.111        | 103.261    | 1.793               | 0.073 | 0.438                   | 120 (96 - 142)             | 213.6 (211.4 - 214.8)       |

|                                                                 |                           |          |         |        |       |              |                           |                                     |
|-----------------------------------------------------------------|---------------------------|----------|---------|--------|-------|--------------|---------------------------|-------------------------------------|
|                                                                 | Wales-Northern Ireland    | 361.361  | 103.261 | 3.5    | <.001 | <b>0.003</b> | 120 (96 - 142)            | 1066.67 (933.33 - 1200.00)          |
| Healthcare commissioning, planning and regulatory organisations | England-Scotland          | -122.159 | 44.623  | -2.738 | 0.006 | <b>0.037</b> | 208.17 (160 - 307.2)      | 240 (131.18 - 500)                  |
|                                                                 | England-Northern Ireland  | -786.684 | 361.817 | -2.174 | 0.03  | 0.178        | 208.17 (160 - 307.2)      | 1500 (470.8 - 4,087)                |
|                                                                 | Scotland-Northern Ireland | 664.525  | 363.4   | 1.829  | 0.067 | 0.405        | 240 (131.18 - 500)        | 1500 (470.8 - 4,087)                |
|                                                                 | Wales-Scotland            | 94.65    | 56.651  | 1.671  | 0.095 | 0.569        | 225 (114.24 - 486.39)     | 240 (131.18 - 500)                  |
|                                                                 | Wales-Northern Ireland    | 759.175  | 363.497 | 2.089  | 0.037 | 0.22         | 225 (114.24 - 486.39)     | 1500 (470.8 - 4,087)                |
|                                                                 | England-Wales             | -27.51   | 45.405  | -0.606 | 0.545 | 1            | 208.17 (160 - 307.2)      | 225 (114.24 - 486.39)               |
| Patient organisation                                            | Wales-England             | 144.727  | 77.321  | 1.872  | 0.061 | 0.367        | 747.93 (500 - 2,000)      | <b>4000 (500 - 11,104)</b>          |
|                                                                 | Wales-Scotland            | 29.422   | 91.028  | 0.323  | 0.747 | 1            | 747.93 (500 - 2,000)      | 1000 (253.68 - 9,745)               |
|                                                                 | Northern Ireland-Wales    | -8.633   | 118.686 | -0.073 | 0.942 | 1            | 650 (600 - 1,450)         | 747.93 (500 - 2,000)                |
|                                                                 | Northern Ireland-Scotland | -38.055  | 103.121 | -0.369 | 0.712 | 1            | 650 (600 - 1,450)         | 1000 (253.68 - 9,745)               |
|                                                                 | Northern Ireland-England  | 153.361  | 91.248  | 1.681  | 0.093 | 0.557        | 650 (600 - 1,450)         | <b>4000 (500 - 11,104)</b>          |
|                                                                 | Scotland-England          | 115.306  | 50.259  | 2.294  | 0.022 | 0.131        | 1000 (253.68 - 9,745)     | <b>4000 (500 - 11,104)</b>          |
| Private companies other than providers of health services       | England-Scotland          | -317.041 | 89.112  | -3.558 | <.001 | <b>0.002</b> | 300 (196.8 - 598.92)      | 1,200 (350 - 5,528.88)              |
|                                                                 | England-Northern Ireland  | -527.308 | 180.717 | -2.918 | 0.004 | <b>0.021</b> | 300 (196.8 - 598.92)      | <b>4179.38 (1,152.19 - 7,687.5)</b> |
|                                                                 | Scotland-Northern Ireland | 210.267  | 200.821 | 1.047  | 0.295 | 1            | 1,200 (350 - 5,528.88)    | <b>4179.38 (1,152.19 - 7,687.5)</b> |
|                                                                 | Wales-Scotland            | 115.061  | 106.256 | 1.083  | 0.279 | 1            | <b>1475 (216 - 6,600)</b> | 1,200 (350 - 5,528.88)              |
|                                                                 | Wales-Northern Ireland    | 325.327  | 189.758 | 1.714  | 0.086 | 0.519        | <b>1475 (216 - 6,600)</b> | <b>4179.38 (1,152.19 - 7,687.5)</b> |

|                                      |                           |          |         |        |       |              |                         |                           |
|--------------------------------------|---------------------------|----------|---------|--------|-------|--------------|-------------------------|---------------------------|
|                                      | England-Wales             | -201.98  | 60.166  | -3.357 | <.001 | <b>0.005</b> | 300 (196.8 – 598.92)    | <b>1475 (216 – 6,600)</b> |
| Private sector healthcare providers  | England-Scotland          | -64.982  | 21.355  | -3.043 | 0.002 | <b>0.014</b> | 240 (166 – 588)         | 647.54 (206.65 – 1,500)   |
|                                      | England-Wales             | -88.107  | 39.755  | -2.216 | 0.027 | 0.16         | 240 (166 – 588)         | 440 (360.94 – 1,732)      |
|                                      | Northern Ireland-Wales    | -206.778 | 52.076  | -3.971 | <.001 | <b>0</b>     | 38.49 (28.9 – 485)      | 440 (360.94 – 1,732)      |
|                                      | Northern Ireland-Scotland | -183.652 | 39.843  | -4.609 | <.001 | <b>0</b>     | 38.49 (28.9 – 485)      | 647.54 (206.65 – 1,500)   |
|                                      | Northern Ireland-England  | 118.671  | 35.352  | 3.357  | <.001 | <b>0.005</b> | 38.49 (28.9 – 485)      | 240 (166 – 588)           |
|                                      | Scotland-wales            | -23.126  | 43.797  | -0.528 | 0.597 | 1            | 647.54 (206.65 – 1,500) | 440 (360.94 – 1,732)      |
| Professional organisations           | England-Northern Ireland  | -35.169  | 109.4   | -0.321 | 0.748 | 1            | 500 (240 – 3,200)       | 600 (320 – 1,784)         |
|                                      | Scotland-Northern Ireland | 157.615  | 114.524 | 1.376  | 0.169 | 1            | 450 (285.67 – 980)      | 600 (320 – 1,784)         |
|                                      | Wales-England             | 182.447  | 69.008  | 2.644  | 0.008 | <b>0.049</b> | 400 (280 – 800)         | 500 (240 – 3,200)         |
|                                      | Wales-Scotland            | 60.001   | 76.873  | 0.781  | 0.435 | 1            | 400 (280 – 800)         | 450 (285.67 – 980)        |
|                                      | Wales-Northern Ireland    | 217.616  | 127.597 | 1.705  | 0.088 | 0.529        | 400 (280 – 800)         | 600 (320 – 1,784)         |
| Public sector primary care providers | Scotland-England          | 122.446  | 39.962  | 3.064  | 0.002 | <b>0.013</b> | 450 (285.67 – 980)      | 500 (240 – 3,200)         |
|                                      | England-Northern Ireland  | -355.779 | 76.292  | -4.663 | <.001 | <b>0</b>     | 434.5 (193.6 – 869)     | 600 (434.5 – 1,600)       |
|                                      | Scotland-Northern Ireland | 407.76   | 105.06  | 3.881  | <.001 | <b>0.001</b> | 434.5 (202.23 – 651,75) | 600 (434.5 – 1,600)       |
|                                      | England-Wales             | -459.79  | 72.597  | -6.333 | <.001 | <b>0</b>     | 434.5 (193.6 – 869)     | 800 (434.5 – 1,152)       |
|                                      | Northern Ireland-Wales    | -104.011 | 102.62  | -1.014 | 0.311 | 1            | 600 (434.5 – 1,600)     | 800 (434.5 – 1,152)       |
|                                      | Scotland-England          | 51.98    | 76.008  | 0.684  | 0.494 | 1            | 434.5 (202.23 – 651,75) | 434.5 (193.6 – 869)       |
|                                      | Scotland-wales            | -511.771 | 102.409 | -4.997 | <.001 | <b>0</b>     | 434.5 (202.23 – 651,75) | 800 (434.5 – 1,152)       |

\*Each row tests the null hypothesis that the Sample 1 and Sample 2 distributions are the same.

†Asymptotic significances (2-sided tests) are displayed. The significance level is .050.

‡Significance values have been adjusted by the Bonferroni correction for multiple tests

Supplementary File 10. Post-hoc Bonferroni pairwise comparisons of payment types between countries

| Payment Type*                   | Group 1 – Group 2** | Test Statistic | Std. Error | Std. Test Statistic | Sig.  | Adj. Sig†,‡ | Median (IQR) – group 1 - £ | Median (IQR) – group 2 - £ |
|---------------------------------|---------------------|----------------|------------|---------------------|-------|-------------|----------------------------|----------------------------|
| Contribution to costs of Events | Wales-England       | 498.254        | 159.743    | 3.119               | 0.002 | 0.011       | 223.36 (120 - 400)         | 240 (155.95 - 400)         |
|                                 | Wales-Scotland      | 1449.82        | 208.45     | 6.955               | <.001 | 0           | 223.36 (120 - 400)         | 300 (160 - 600)            |
|                                 | Wales-Northern      | 2690.485       | 402.839    | 6.679               | <.001 | 0           | 223.36 (120 - 400)         | 477.6 (200 - 1,147.6)      |
|                                 | England-Scotland    | -951.566       | 143.605    | -6.626              | <.001 | 0           | 240 (155.95 - 400)         | 300 (160 - 600)            |
|                                 | England-Northern    | -2192.23       | 373.43     | -5.871              | <.001 | 0           | 240 (155.95 - 400)         | 477.6 (200 - 1,147.6)      |
|                                 | Scotland-Northern   | 1240.664       | 396.716    | 3.127               | 0.002 | 0.011       | 300 (160 - 600)            | 477.6 (200 - 1,147.6)      |
| Donations and Grants            | Wales-England       | 25.151         | 94.77      | 0.265               | 0.791 | 1           | 800 (434.5 - 2,200)        | 959.98 (256 - 4,800)       |
|                                 | Northern-Scotland   | -140.935       | 137.745    | -1.023              | 0.306 | 1           | 434.5 (217.5 - 1,867.5)    | 651.75 (217.25 - 2,578)    |
|                                 | Northern-Wales      | -451.347       | 142.863    | -3.159              | 0.002 | 0.009       | 434.5 (217.5 - 1,867.5)    | 800 (434.5 - 2,200)        |
|                                 | Northern-England    | 476.498        | 111.315    | 4.281               | <.001 | 0           | 434.5 (217.5 - 1,867.5)    | 959.98 (256 - 4,800)       |
|                                 | Scotland-Wales      | -310.412       | 124.755    | -2.488              | 0.013 | 0.077       | 651.75 (217.25 - 2,578)    | 800 (434.5 - 2,200)        |
|                                 | Scotland-England    | 335.563        | 86.862     | 3.863               | <.001 | 0.001       | 651.75 (217.25 - 2,578)    | 959.98 (256 - 4,800)       |

\*Kruskal-Wallis results: Contributions to cost of events  $\chi^2(3) = 89.680, p = .000$ ; Donations and grants  $\chi^2(3) = 31.698, p = <.000$

\*\*Each row tests the null hypothesis that the Sample 1 and Sample 2 distributions are the same.

†Asymptotic significances (2-sided tests) are displayed. The significance level is .050.

‡Significance values have been adjusted by the Bonferroni correction for multiple tests.



STROBE Statement—Checklist of items that should be included in reports of *cross-sectional studies*

|                              | Item No | Recommendation                                                                                                                                                                                    | Page No                             |
|------------------------------|---------|---------------------------------------------------------------------------------------------------------------------------------------------------------------------------------------------------|-------------------------------------|
| <b>Title and abstract</b>    | 1       | (a) Indicate the study's design with a commonly used term in the title or the abstract                                                                                                            | 2                                   |
|                              |         | (b) Provide in the abstract an informative and balanced summary of what was done and what was found                                                                                               | 2                                   |
| <b>Introduction</b>          |         |                                                                                                                                                                                                   |                                     |
| Background/rationale         | 2       | Explain the scientific background and rationale for the investigation being reported                                                                                                              | 3-4                                 |
| Objectives                   | 3       | State specific objectives, including any prespecified hypotheses                                                                                                                                  | 4                                   |
| <b>Methods</b>               |         |                                                                                                                                                                                                   |                                     |
| Study design                 | 4       | Present key elements of study design early in the paper                                                                                                                                           | 5                                   |
| Setting                      | 5       | Describe the setting, locations, and relevant dates, including periods of recruitment, exposure, follow-up, and data collection                                                                   | 5                                   |
| Participants                 | 6       | (a) Give the eligibility criteria, and the sources and methods of selection of participants                                                                                                       | 5                                   |
| Variables                    | 7       | Clearly define all outcomes, exposures, predictors, potential confounders, and effect modifiers. Give diagnostic criteria, if applicable                                                          | 5-6                                 |
| Data sources/<br>measurement | 8*      | For each variable of interest, give sources of data and details of methods of assessment (measurement). Describe comparability of assessment methods if there is more than one group              | 5-6                                 |
| Bias                         | 9       | Describe any efforts to address potential sources of bias                                                                                                                                         | n/a                                 |
| Study size                   | 10      | Explain how the study size was arrived at                                                                                                                                                         | N/a                                 |
| Quantitative variables       | 11      | Explain how quantitative variables were handled in the analyses. If applicable, describe which groupings were chosen and why                                                                      | 5                                   |
| Statistical methods          | 12      | (a) Describe all statistical methods, including those used to control for confounding                                                                                                             | 5                                   |
|                              |         | (b) Describe any methods used to examine subgroups and interactions                                                                                                                               | n/a                                 |
|                              |         | (c) Explain how missing data were addressed                                                                                                                                                       | n/a                                 |
|                              |         | (d) If applicable, describe analytical methods taking account of sampling strategy                                                                                                                | n/a                                 |
|                              |         | (e) Describe any sensitivity analyses                                                                                                                                                             | n/a                                 |
| <b>Results</b>               |         |                                                                                                                                                                                                   |                                     |
| Participants                 | 13*     | (a) Report numbers of individuals at each stage of study—eg numbers potentially eligible, examined for eligibility, confirmed eligible, included in the study, completing follow-up, and analysed | Supplementary File 4 (flow diagram) |
|                              |         | (b) Give reasons for non-participation at each stage                                                                                                                                              | n/a                                 |
|                              |         | (c) Consider use of a flow diagram                                                                                                                                                                | Supplementary File 4                |

|                          |     |                                                                                                                                                                                                              |       |
|--------------------------|-----|--------------------------------------------------------------------------------------------------------------------------------------------------------------------------------------------------------------|-------|
| Descriptive data         | 14* | (a) Give characteristics of study participants (eg demographic, clinical, social) and information on exposures and potential confounders                                                                     | n/a   |
|                          |     | (b) Indicate number of participants with missing data for each variable of interest                                                                                                                          | n/a   |
| Outcome data             | 15* | Report numbers of outcome events or summary measures                                                                                                                                                         | 6     |
| Main results             | 16  | (a) Give unadjusted estimates and, if applicable, confounder-adjusted estimates and their precision (eg, 95% confidence interval). Make clear which confounders were adjusted for and why they were included | n/a   |
|                          |     | (b) Report category boundaries when continuous variables were categorized                                                                                                                                    | n/a   |
|                          |     | (c) If relevant, consider translating estimates of relative risk into absolute risk for a meaningful time period                                                                                             | n/a   |
| Other analyses           | 17  | Report other analyses done—eg analyses of subgroups and interactions, and sensitivity analyses                                                                                                               | n/a   |
| <b>Discussion</b>        |     |                                                                                                                                                                                                              |       |
| Key results              | 18  | Summarise key results with reference to study objectives                                                                                                                                                     | 11-13 |
| Limitations              | 19  | Discuss limitations of the study, taking into account sources of potential bias or imprecision. Discuss both direction and magnitude of any potential bias                                                   | 13    |
| Interpretation           | 20  | Give a cautious overall interpretation of results considering objectives, limitations, multiplicity of analyses, results from similar studies, and other relevant evidence                                   | 11-14 |
| Generalisability         | 21  | Discuss the generalisability (external validity) of the study results                                                                                                                                        | 11-14 |
| <b>Other information</b> |     |                                                                                                                                                                                                              |       |
| Funding                  | 22  | Give the source of funding and the role of the funders for the present study and, if applicable, for the original study on which the present article is based                                                | 1     |

\*Give information separately for exposed and unexposed groups.

**Note:** An Explanation and Elaboration article discusses each checklist item and gives methodological background and published examples of transparent reporting. The STROBE checklist is best used in conjunction with this article (freely available on the Web sites of PLoS Medicine at <http://www.plosmedicine.org/>, Annals of Internal Medicine at <http://www.annals.org/>, and Epidemiology at <http://www.epidem.com/>). Information on the STROBE Initiative is available at [www.strobe-statement.org](http://www.strobe-statement.org).

# BMJ Open

## Comparing pharmaceutical company payments in the four UK countries: a cross-sectional and social network analysis

|                                 |                                                                                                                                                                                                                                               |
|---------------------------------|-----------------------------------------------------------------------------------------------------------------------------------------------------------------------------------------------------------------------------------------------|
| Journal:                        | <i>BMJ Open</i>                                                                                                                                                                                                                               |
| Manuscript ID                   | bmjopen-2022-061591.R2                                                                                                                                                                                                                        |
| Article Type:                   | Original research                                                                                                                                                                                                                             |
| Date Submitted by the Author:   | 09-Mar-2023                                                                                                                                                                                                                                   |
| Complete List of Authors:       | Rickard, Emily; University of Bath, Department of Social and Policy Sciences<br>Carmel, Emma; University of Bath, Department of Social and Policy Sciences<br>Ozieranski, Piotr; University of Bath, Department of Social and Policy Sciences |
| <b>Primary Subject Heading</b>: | Health policy                                                                                                                                                                                                                                 |
| Secondary Subject Heading:      | Public health                                                                                                                                                                                                                                 |
| Keywords:                       | Health policy < HEALTH SERVICES ADMINISTRATION & MANAGEMENT, MEDICAL ETHICS, PUBLIC HEALTH                                                                                                                                                    |
|                                 |                                                                                                                                                                                                                                               |

SCHOLARONE™  
Manuscripts



I, the Submitting Author has the right to grant and does grant on behalf of all authors of the Work (as defined in the below author licence), an exclusive licence and/or a non-exclusive licence for contributions from authors who are: i) UK Crown employees; ii) where BMJ has agreed a CC-BY licence shall apply, and/or iii) in accordance with the terms applicable for US Federal Government officers or employees acting as part of their official duties; on a worldwide, perpetual, irrevocable, royalty-free basis to BMJ Publishing Group Ltd ("BMJ") its licensees and where the relevant Journal is co-owned by BMJ to the co-owners of the Journal, to publish the Work in this journal and any other BMJ products and to exploit all rights, as set out in our [licence](#).

The Submitting Author accepts and understands that any supply made under these terms is made by BMJ to the Submitting Author unless you are acting as an employee on behalf of your employer or a postgraduate student of an affiliated institution which is paying any applicable article publishing charge ("APC") for Open Access articles. Where the Submitting Author wishes to make the Work available on an Open Access basis (and intends to pay the relevant APC), the terms of reuse of such Open Access shall be governed by a Creative Commons licence – details of these licences and which [Creative Commons](#) licence will apply to this Work are set out in our licence referred to above.

Other than as permitted in any relevant BMJ Author's Self Archiving Policies, I confirm this Work has not been accepted for publication elsewhere, is not being considered for publication elsewhere and does not duplicate material already published. I confirm all authors consent to publication of this Work and authorise the granting of this licence.

# 1 Comparing pharmaceutical company payments in the four UK 2 countries: a cross-sectional and social network analysis

3  
4  
5  
6  
7  
8 Emily Rickard

9 Department of Social and Policy Sciences, University of Bath, Bath, United Kingdom.

10 Email: [e.j.rickard@bath.ac.uk](mailto:e.j.rickard@bath.ac.uk)

11  
12  
13 Emma Carmel

14 Department of Social and Policy Sciences, University of Bath, Bath, United Kingdom.

15 Email: [e.k.carmel@bath.ac.uk](mailto:e.k.carmel@bath.ac.uk)

16  
17  
18 Piotr Ozieranski (Corresponding Author)

19 Department of Social and Policy Sciences, University of Bath, Bath, United Kingdom.

20 Email: [p.ozieranski@bath.ac.uk](mailto:p.ozieranski@bath.ac.uk)

21  
22  
23 Word count: 4921

## 24 25 26 **Key words**

27 Transparency, financial disclosures, pharmaceutical industry, health policy, conflicts of  
28 interest

## 29 30 31 **ABSTRACT**

32  
33  
34 **Objectives** To examine the characteristics of pharmaceutical payments to healthcare and  
35 patient organisations in the four UK countries. Compare companies spending the most;  
36 types of organisations receiving payments; and types of payments in the four countries.  
37 Measure the extent to which companies target payments at the same recipients in each  
38 country and whether it differs depending on the type of recipient.

39  
40  
41 **Design** Cross-sectional comparative and social network analysis.

42  
43  
44 **Setting** England, Scotland, Wales, Northern Ireland.

45  
46  
47 **Participants** 100 donors (pharmaceutical companies) reporting payments to 4,229 recipients  
48 (healthcare organisations and patient organisations) in 2015.

49  
50  
51 **Main outcome measures** For each country: payment totals and distribution; average  
52 number of common recipients between companies; share of payments to organisations  
53 fulfilling different roles in the health ecosystem; and payments for different activities.

54  
55  
56 **Results** Companies prioritised different types of recipient and different types of activity in  
57 each country. There were significant differences in the distribution of payments across the  
58 four countries, even for similar types of recipients. Recipients in England and Wales received  
59 smaller individual payments than in Scotland and Northern Ireland. Overall, targeting shared  
60

1 recipients occurred most frequently in England, but was also common in certain pockets of  
2 each country's health ecosystem. We found evidence of reporting errors in Disclosure UK.

3  
4  
5  
6  
7 **Conclusions** Our findings suggest a strategic approach to payments tailored to countries'  
8 policy and decision-making context, indicating there may be specific vulnerabilities to  
9 financial conflicts of interest at sub-national level. Payment differences between countries  
10 may be occurring in other countries, particularly those with decentralised health systems  
11 and/or high levels of independence across its decision-making authorities. We call for a  
12 single database containing all recipient types, full location details, and published with  
13 associated descriptive and network statistics.  
14  
15  
16  
17  
18

### 19 **STRENGTHS AND LIMITATIONS OF THIS STUDY**

- 20 • This is the first study to compare pharmaceutical industry payments in England,  
21 Scotland, Wales and Northern Ireland
- 22 • Our analysis created a new database combining payments disclosed in Disclosure UK  
23 with individual company disclosures of payments to patient organisations
- 24 • We use social network analysis to facilitate a systematic sub-national comparison of  
25 payments
- 26 • One key limitation is that the data is from 2015 and is not able to assess trends in  
27 payment types or amounts.  
28  
29  
30  
31  
32  
33  
34  
35  
36  
37  
38  
39  
40  
41  
42  
43  
44  
45  
46  
47  
48  
49  
50  
51  
52  
53  
54  
55  
56  
57  
58  
59  
60

## 1 INTRODUCTION

2 Some of the major pharmaceutical companies spend more on marketing than on the  
3 development of products<sup>1 2 3</sup>. Industry marketing efforts include payments to physicians,  
4 which are seen to boost innovation and efficiency in healthcare<sup>4</sup> but also generate concerns  
5 about *individual* financial conflicts of interest (COIs), influencing prescribing choices<sup>5</sup> and  
6 leading to patient harms<sup>6</sup>. Payments to healthcare and patient organisations have also been  
7 seen to generate *institutional* financial COIs around policy and programme decision-making.  
8 An institution's primary goals *may* be unduly influenced by a secondary interest<sup>7</sup>, which can  
9 be more damaging than individual COIs<sup>7-9</sup>. COIs are defined in terms of the *risk* of undue  
10 influence and not actual bias or misconduct<sup>9</sup>, but institutional COIs have been linked to  
11 increased prescriptions of drugs with unproven safety<sup>8</sup>, distorting research agendas<sup>10</sup>,  
12 threatening the objectivity of professional education<sup>7</sup>, and compromising independence<sup>11</sup>.  
13 These observations have highlighted what has been called the pharmaceutical industry's  
14 'web of influence', in which companies "sustain large networks to gather, create, control  
15 and disseminate information"<sup>12</sup>.

16  
17 The potential to distort public health research and policy to favour commercial interests  
18 above patients' has led to increased policy scrutiny<sup>13 14</sup>, including the introduction of self-  
19 regulatory payment disclosure requirements for pharmaceutical companies in Europe<sup>15</sup>.  
20 Such measures are intended to aid transparency, reducing conflicts of interest and undue  
21 influence on clinical and policy decisions. This article combines and analyses disclosure data  
22 to better understand the depth, breadth, and structure of industry payments and compares  
23 them in the four countries of the UK. Comparative analysis can illustrate novel ethical and  
24 governance problems<sup>16</sup> or reveal that recognised problems are common across countries<sup>17</sup>,  
25 which our systematic examination of the extent and diversity of payments reported by  
26 pharmaceutical companies explores.

### 27 *Disclosure of industry payments*

28 In the United States, pharmaceutical industry disclosures of payments to physicians and  
29 teaching hospitals were made mandatory in 2013<sup>18</sup>, and subsequent research has examined  
30 payments to physicians<sup>19-30</sup>, with institutional payments to hospitals largely ignored<sup>31</sup>.  
31 Payments to patient organisations, defined as not-for-profit institutions that primarily  
32 represent the needs of patients and/or caregivers<sup>32</sup>, have been seldom explored in the US<sup>33</sup>  
33 <sup>34</sup> as their disclosure is not regulated by the state or industry.

34  
35  
36 The prevalence of self-regulation in Europe is associated with very different disclosure rules  
37 to the US<sup>35 36</sup>. Since 2012, the European trade association, the European Federation of  
38 Pharmaceutical Industries and Associations (EFPIA), has mandated that pharmaceutical  
39 companies publish annual disclosures of their payments to patient organisations on their  
40 websites<sup>37</sup>. Subsequent studies revealed extensive funding in the UK<sup>38 39</sup> and the Nordic  
41 countries<sup>40 41</sup>. However, transparency remains limited by a lack of standardised reporting  
42 requirements and limited oversight<sup>42</sup> which are associated with payment under-reporting by  
43 both donors and recipients<sup>39</sup>.

44  
45 In separate self-regulatory arrangements<sup>43</sup>, disclosures of payments to healthcare  
46 organisations, defined by the industry as healthcare, medical or scientific associations or  
47 organisations such as hospitals, clinics, foundations or universities<sup>44</sup>, have been mandated

1 since 2015. In the UK, these are reported annually in a centralised database, Disclosure UK,  
2 hosted by the industry trade body, the Association for the British Pharmaceutical Industry  
3 (ABPI). Most research attention has been on the poor accessibility and quality of the data<sup>35</sup>,  
4 noting lack of standardisation of recipients<sup>4 25</sup> and inadequate details about individual  
5 payments' purpose<sup>4</sup>. These make tracking and analysing the payments complicated and  
6 time-consuming, hindering the principle aim of improving transparency.

7  
8 Our study is the first, to our knowledge, to systematically combine industry data on  
9 payments to healthcare organisations and patient organisations as the self-regulatory codes  
10 allow them to be reported separately. Analysing them together enables us to better assess  
11 the breadth and depth of the 'web of influence', and gain insight into potential  
12 reinforcement effects of payments to multiple and diverse organisations that have separate  
13 yet overlapping interests, including providing patient care and support<sup>31 38</sup>, involvement in  
14 policy-making<sup>13 45 46</sup>, and conducting clinical research<sup>9 38</sup>.

### 15 *Regional differences in industry payments*

16 Another aspect of the industry's web of influence largely unexplored in Europe is whether  
17 and how it is structured around regional differences in payments. Little is known about  
18 strategic targeting of particular fields of healthcare provision and/or decision-making, nor  
19 about possible effects on COIs in regional policy-making. Regionally targeted payments may  
20 have direct policy effects 'upstream', such as commissioning (the planning, prioritising, and  
21 purchasing of public health services)<sup>47</sup>; and 'downstream', such as bearing greater influence  
22 on organisational priorities and day-to-day practices.

23  
24  
25 Emerging US research has found significant differences in the distribution of payments  
26 between states<sup>20 48-50</sup>, including by state size<sup>51</sup> and political composition<sup>52</sup>, indicating that  
27 demographics and the organisation and regulation of healthcare matter. The first regional  
28 analysis in Europe revealed differences in the total value and type of payments prioritised in  
29 eight countries<sup>17</sup>. Most recently a UK study found headquarter distance from country  
30 capitals predicts patient organisations' dependence on pharmaceutical company funding<sup>53</sup>.  
31 To date, research has not considered the locations of patient and healthcare organisations  
32 as the reporting requirements do not extend to disclosing country locations<sup>17 25 28</sup>.

33  
34 However, the UK presents a crucial case for this type of analysis given its importance as a  
35 pharmaceutical market<sup>54</sup>, large value of payments compared to other European countries<sup>17</sup>  
36 and vast charitable sector comprising many potential recipients<sup>55</sup>. England, Scotland, Wales  
37 and Northern Ireland have four distinct health systems, with substantial autonomy to  
38 determine health policies and services<sup>56-58</sup>. They also differ demographically – population  
39 size is largest in England and smallest in Northern Ireland<sup>59</sup> and health outcomes are highest  
40 in England and lowest in Scotland<sup>60</sup>. The demographic and health system differences could  
41 be associated with how industry engages with different healthcare sectors.

42  
43 We know that pharmaceutical companies prioritise payments to different types of  
44 healthcare organisations in the UK<sup>25 28</sup>, however commercially patterned inequalities,  
45 including dominant funders or types of recipients, may be more pronounced sub-nationally  
46 in the in the smallest UK countries yet hidden by UK-level analysis to date<sup>16</sup>. Studies have  
47 started recognising the country distinction, focusing on payments to healthcare



1 organisations in England<sup>47 61</sup>, but cross-country comparisons have not yet been conducted.  
2 Comparative insights could also help understand whether similar patterns are occurring in  
3 other European countries with highly decentralised healthcare set-ups, including Germany<sup>62</sup>  
4 and Spain<sup>63</sup>.

5  
6 In this article, we apply social network analysis (SNA) which offers new insights into industry  
7 marketing tactics<sup>64 65 61</sup>. SNA can reveal areas of the healthcare ecosystem where  
8 connections between companies, measured by the number of payment recipients  
9 companies have in common, are most prevalent. Prevalent connections may highlight  
10 industry marketing efforts in pockets of each of the UK's health systems, including indicating  
11 areas of *competition* between companies<sup>66 67 68</sup> and revealing areas where companies are  
12 seeking to enhance their visibility<sup>61 69</sup>.

13  
14 We integrate and analyse data from Disclosure UK and disclosures of payments to patient  
15 organisations to examine patterns in pharmaceutical company payments to organisations in  
16 the UK healthcare ecosystem. Specifically, our objectives are to:

- 17  
18 • examine the characteristics of payments to healthcare and patient organisations in  
19 the four countries
- 20 • compare the top donors financially in each country
- 21 • identify similarities and differences in the types of payments and in the types of  
22 organisations receiving payments in the four countries
- 23 • measure the extent to which companies target payments at the same recipients in  
24 each country and whether it differs depending on the type of recipient.

## 25 26 **METHODS**

### 27 28 **Data sources**

29 Our primary data sources are publicly available pharmaceutical industry transparency  
30 disclosures from 2015. Corresponding to relevant ABPI<sup>70</sup> and EFPIA Codes<sup>37</sup>, pharmaceutical  
31 companies disclose payments to healthcare organisations and to patient organisations  
32 separately.

33  
34 Payments to healthcare organisations are disclosed in a centralised database, Disclosure UK,  
35 published annually by the ABPI. Payments are disclosed with recipient name, payment type  
36 (donations and grants, costs of events, joint working, and consultancy – see Supplementary  
37 File 1) and value, and address information. We use the 2015 version of Disclosure UK and  
38 focus on non-R&D payments to healthcare organisations (R&D payments are reported as  
39 one lump sum per company without named recipients<sup>25 43</sup>).

40  
41 Payments to patient organisations are only available on individual pharmaceutical company  
42 websites and are usually presented as a PDF file and include recipient name, payment  
43 description, and payment value<sup>42</sup>. We extracted the payments to patient organisations data  
44 into a single database, standardising names and identifying headquarter addresses as part  
45 of another project<sup>38</sup>. We detail our approach to data cleaning these data elsewhere<sup>25 38</sup>.

## 1 Dataset preparation and integration

2 We followed several steps to prepare the Disclosure UK and patient organisation datasets  
3 for analysis. First, we merged the two datasets (see Supplementary File 2 for data  
4 integration flowchart). Second, as Disclosure UK provides incomplete addresses, we  
5 conducted independent web searches on each payment recipient to determine which UK  
6 country they are based. We used the same methodology to determine patient  
7 organisations' locations. Third, we excluded payments to patient organisations duplicated in  
8 the two datasets and identified patient organisations incorrectly reported as healthcare  
9 organisations in Disclosure UK. Fourth, we coded the patient organisation descriptions to  
10 match the codes used by Disclosure UK (Supplementary File 1).

11  
12 Fifth, as part of a previous study<sup>25</sup> we standardised recipient names for almost 20,000  
13 payment entries and inductively categorised them based on their function within the  
14 healthcare system (e.g. service provider) and their sector (e.g. public or private) (see  
15 Supplementary File 3 for comprehensive definitions and examples of organisations). For the  
16 current study we introduced patient organisations. Recipient types (with the most  
17 frequently occurring example) included in our analysis are:

### 18 *Providers of health services*

- 19 • Alternative providers of health services (e.g. community interest companies  
20 providing health services)
- 21 • Healthcare commissioning, planning and regulatory organisations (e.g. clinical  
22 commissioning groups)
- 23 • Private sector healthcare providers (e.g. private healthcare groups)
- 24 • Public sector primary care providers (e.g. GP surgeries)
- 25 • Public sector secondary and tertiary care providers (e.g. NHS trusts)

### 26 *Representative organisations*

- 27 • Formal bodies representing healthcare professionals or patients (e.g. local medical  
28 committees)
- 29 • Patient organisations (e.g. multipurpose patient organisations)
- 30 • Professional organisations (e.g. multi-professional or multi-stakeholder  
31 organisations)

### 32 *Other organisations*

- 33 • Charities and other third-sector organisations (excludes providers of health services,  
34 professional organisations, and patient organisations) (e.g. charitable trusts  
35 providing educational events for healthcare professionals)
- 36 • Education and research providers (e.g. universities)
- 37 • Private companies other than providers of health services (e.g. providers of medical  
38 communications or training services)
- 39 • Public administration and providers of public services (e.g. local authorities)
- 40 • Recipients unclear (when no information could be found)

## 41 **Analysis**

42 We calculated the total and median value of payments in each country and recipient type.  
43 The Shapiro-Wilks test of normalcy found the data to be non-normal in each country,  
44  
45  
46  
47

1 therefore non-parametric Kruskal-Wallis tests (adjusted for ties) were used to check for  
2 between-country differences in the distribution of payments overall and in the different  
3 recipient types. Dunn's post-hoc pairwise analyses (with Bonferroni's correction for multiple  
4 comparisons) were conducted to identify where differences were present between  
5 countries and recipient types. Kruskal-Wallis and Dunn's tests do not assume equal sample  
6 sizes<sup>71</sup> and have been conducted on similar industry disclosure data<sup>72 73 74</sup>. Statistical  
7 significance was set at  $p = \leq .05$ .

8  
9 SNA was used to measure the number payment recipients that were common between  
10 pairs of pharmaceutical companies (density) and across all companies (degree centrality).  
11 Density measures the overall level of connection in a network and can be used to compare  
12 the structure of different groups<sup>75</sup>. It produces two outputs – average value (average  
13 number of recipients each pair of companies shares<sup>76</sup>) and average weighted degree  
14 (average of the total number recipients each company shares with other companies). The  
15 higher these values, the more frequently a multiple companies target the same recipients in  
16 a given network<sup>77</sup>. For example, a density score of 1.194 tells us that all pairs of companies  
17 in the network funded an average of 1.2 recipients in common. Degree centrality, on the  
18 other hand, provides a score for each individual company based on the number of recipients  
19 in common it shares with other companies in the network – the higher the score, the more  
20 recipients a company shares<sup>75 78</sup>. For example, if a company has a degree centrality score of  
21 320, they funded the same recipient as another company 320 times.

22  
23 We compare the number of common recipients companies have in each country overall and  
24 when targeting different recipient types in each country. SNA requires data to be structured  
25 as a matrix, therefore we transformed the payment data into a series of matrices of  
26 pharmaceutical companies with ties based on the number of recipients each company  
27 shared with other companies in each country and recipient type. To identify which  
28 companies targeted the same recipients, each matrix consisted only of the companies  
29 making at least one payment (regardless of whether or not they shared any recipients). We  
30 conducted separate network analyses on each of the four countries as the findings would  
31 otherwise be highly influenced by England's data as the largest network.

32  
33 Data was processed in Microsoft Excel. The dataset underpinning our analysis is published in  
34 the Bath Research Data Archive<sup>79</sup>. We analysed the data descriptively in SPSS version 27  
35 (IBM) and Microsoft Excel. We conducted social network analysis in UCINET version 6<sup>77</sup>.  
36 Country networks were visualised in Gephi version 0.9.2.

## 37 38 **Outcome measures**

### 39 40 *Breadth of payments in each country*

41 First, we explored the payment characteristics in each country. We measured the total and  
42 median values and the number of: payments, recipients, and companies. We adjusted the  
43 total value by population size for comparison. We also compared the distribution of  
44 payments between each country using Kruskal-Wallis tests.

45  
46 Second, we identified the top 10% of companies making payments in each country and  
47 compared the payment strategies of the companies paying the most in each country.

### 1 *Depth of payments in each country*

2 Third, we assessed companies making payments to the same recipients by measuring the  
3 average number of common recipients between each pair of companies (degree centrality).

4  
5 Fourth, we scrutinised which companies dominate the payment networks in each country  
6 by identifying the number of recipients that each company had in common with every other  
7 company.

### 8 *Structure of payments in each country*

9 Fifth, for each country we identified which type of recipient was prioritised. To do this, we  
10 measured and compared the proportion of payments received by each recipient type. We  
11 also compared the distribution of payments to each recipient type using Kruskal-Wallis tests  
12 to determine whether payments to similar types of recipients differ between countries.

13  
14  
15 Sixth, we examined whether companies making payments to *each recipient type in each*  
16 *country* made payments to the same organisations by measuring the average number of  
17 recipients each pair of companies share.

18  
19  
20 Seventh, for each country we assessed which types of payments were prioritised through  
21 identifying the proportion of different payment types. We also compared the four types of  
22 payments using Kruskal-Wallis tests to identify differences in the distribution of payments.

### 23 *Disclosure accuracy*

24 Finally, as a secondary outcome we measured the number of patient organisations,  
25 alongside the number and value of payments, that were incorrectly disclosed as healthcare  
26 organisations in Disclosure UK.

### 27 **Patient and public involvement**

28 The study did not involve patients.

## 29 **RESULTS**

30  
31  
32 We structure our findings consistent with the order of the outcome measures outlined  
33 above. First, we explore the breadth, depth, and structure of payments in each country.  
34 While there is inevitable overlap between these framing terms, this will be signposted  
35 throughout. We also examine overall accuracy of disclosures.

### 36 **Breadth of payments in the four countries**

37  
38 The total value and number of payments, the number of recipients, and the number of  
39 companies making payments were consistent with the size of each country, with England  
40 receiving the highest and Northern Ireland the lowest (this was maintained after adjusting  
41 for population size – see Table 1).

42  
43  
44 Table 1. Value and number of payments, number of companies and recipients, and top  
45 donors in integrated dataset

| Descriptive statistic | England | Scotland | Wales | Northern Ireland |
|-----------------------|---------|----------|-------|------------------|
|-----------------------|---------|----------|-------|------------------|

|                                                   |             |             |             |                  |
|---------------------------------------------------|-------------|-------------|-------------|------------------|
| Country population 2015* - n                      | 54,786,300  | 5,373,000   | 3,099,100   | 1,851,600        |
| Total value - £                                   | 52,445,615  | 3,649,749   | 1,987,703   | 518,000          |
| Total value - £ (adjusted for population size)†   | 957,037     | 675,880     | 641,194     | 272,632          |
| Payments - n                                      | 18,190      | 1,370       | 990         | 311              |
| Recipients - n                                    | 3,575       | 282         | 216         | 156              |
| Companies - n                                     | 100         | 72          | 64          | 42               |
| Median payment value (IQR) - £                    | 280 (665.5) | 400 (685.3) | 300 (658.2) | 475.20 (1,164.4) |
| Value of payments to healthcare organisations - £ | 40,217,772  | 3,029,365   | 1,887,918   | 474,795          |
| Value of payments to patient organisations - £    | 12,227,843  | 620,384     | 99,784      | 43,206           |

\*Data obtained from the Office for National Statistics, values correct for mid-2015

†Total value of payments divided by the population size

#### *Between-country differences in payment values*

There was a statistically significant difference in the distribution of individual payments between the four countries,  $\chi^2(3) = 50.127$ ,  $p = <.001$ . Dunn's post-hoc comparisons showed that this difference was driven by significantly higher median payments (Table 1) being made in Scotland ( $p = <.001$ ) and Northern Ireland ( $p = <.001$ ) than England. Payment size also varied significantly between Northern Ireland-Wales ( $p = <.000$ ), Scotland-Wales ( $p = .001$ ), and Northern Ireland-Scotland ( $p = .004$ ).

#### *Top donors in each country*

The companies spending most in each country also reveals different approaches to payments (see Supplementary File 4). The top donors generally made larger payments in Wales and multiple smaller payments in Northern Ireland. Pfizer was consistently a top donor measured by value and volume of payments in all four countries, indicating an approach to payments focused on breadth. At the country-level, in England, Novartis was the second biggest donor characterised by large payments; similar patterns characterised Biogen's payments in Scotland and Wales. England, Scotland and Northern Ireland all had at least one top donor not featuring as a top donor in another country, indicating some companies' payments may be more targeted regionally than others.

#### **Depth of engagement in the four countries**

Companies making payments in England had the highest number of common recipients - an average of six to seven recipients (Table 2), implying a significant concentration of shared interest around a spectrum of organisations. Companies, on average, had at least one recipient in common with another company in Scotland and Wales, and were least connected in Northern Ireland (Table 2), indicating that in smaller countries, company interest in particular recipients is more concentrated. The average weighted degree density score shows the average number of recipients a company shares with *all* companies in the

1 network, where similarly the highest score was observed in England (664.36 recipients) and  
 2 lowest in Northern Ireland. The visualised networks are in Supplementary File 5.

3  
 4 Table 2. Pharmaceutical company connections in each country measured by common  
 5 recipients

| Network measure*                                                                                                                           | England        | Scotland     | Wales        | Northern Ireland |
|--------------------------------------------------------------------------------------------------------------------------------------------|----------------|--------------|--------------|------------------|
| <i>Density – average value (average number of recipients in common between two companies)</i>                                              | 6.71           | 1.24         | 1.13         | 0.42             |
| <i>Density – average weighted degree (average number of recipients in common for all companies in the network)</i>                         | 664.36         | 88.39        | 71.06        | 17.38            |
| <i>Company with highest degree centrality score (number of recipients a company has in common with all other companies in the network)</i> | Pfizer (3,394) | Pfizer (319) | Pfizer (206) | Pfizer (63)      |

6 \*Calculations were conducted on valued networks which means they consider the number of  
 7 common recipients and not just the presence of a shared recipient. Networks include only  
 8 companies making payments in each country.

9  
 10 The data also indicates variation in the depth of payments at the company level, as some  
 11 companies focus collectively on particular recipients and some companies target a broader  
 12 set of organisations with exclusive funding. Pfizer consistently targeted the same recipients  
 13 as other companies most frequently in every country. Pfizer's degree centrality score of  
 14 3,394 in England shows that the company funded the same organisation as another  
 15 company 3,394 times in the year (Table 2). Many of the most connected companies (see  
 16 Supplementary File 6) were similar in England, Scotland and Wales. However, Northern  
 17 Ireland's top ten most connected companies were more varied and featured smaller  
 18 companies, suggesting that a cluster of companies had a unique interest Northern Ireland's  
 19 health system. Further, differences between top donors and topmost connected companies  
 20 in each country highlight potentially divergent strategies in targeted funding. For example,  
 21 Merck Sharpe and Dohme was highly connected in every country but was not a top donor.

22  
 23 Coupled, the SNA and descriptive data provides evidence that some companies prioritise  
 24 breadth of payments, targeting a broader spectrum of organisations, while other companies  
 25 prioritise depth, targeting recipients which seem important or 'popular' across the industry  
 26 and potentially competing with other companies for visibility.

## 27 28 **Structure of payments in each country**

### 29 *Structural differences in targeted recipient types between countries*

30 The share of the total value of payments received by recipient types revealed diverse  
 31 funding strategies in each country (Figure 1). In Wales and Scotland, industry targeted  
 32 funding 'upstream' at healthcare commissioning, planning and regulatory organisations,  
 33 primarily each country's local health boards that plan and deliver NHS services<sup>80 81</sup>. In Wales,  
 34 they received just under half of all payments - £920,980.22 (46.38% of Wales' total  
 35 payments, see Supplementary File 7 for values and Supplementary File 8 for top recipients).

In Scotland, they received £878,333.57 (24.13%). Notably, the two Scottish health boards serving the fewest people received no payments. In England and Northern Ireland, funding was targeted 'downstream'. England's public sector secondary and tertiary care providers, namely consisting of NHS trusts which provide hospital and sometimes community healthcare services to residents<sup>82</sup>, received the most funding (£13,349,779.1 – 25.56%). In Northern Ireland, public sector primary care providers, primarily general practitioner practices, were targeted with the most funding (£184,903.09 – 35.72%).

Figure 1. Percentage of payments to recipient types per country

There were statistically significant differences in the distribution of payments, indicating that payment values vary between the four countries even when the recipient type is the same (see Table 3). Post-hoc analyses maintained the significant differences, except for in patient organisations (see Supplementary File 9).

Patient organisations were a major target of payments, especially in England and Scotland (Table 3). Professional organisations, including societies and groups of healthcare professionals, were prioritised in England, Scotland and Northern Ireland, with significant but negligible differences in payment values. Consistent with the locations of the top UK universities, industry targeted education and research providers in England (median = £1000) and Scotland, (£1,152) where payments were also significantly higher than Wales (£336). Public sector primary care providers, primarily general practitioner practices, received a very small proportion of the total funding in England and Scotland, yet had the most individual recipients in all four countries, suggesting smaller per-recipient payment totals. This is further reflected in the median values per recipient, which were significantly lower in England (£435) and Scotland (£435) than Wales (£800) and Northern Ireland (£600).

Table 3. Differences in payment sizes between countries

| Recipient type                                                         | Median (IQR) - £         |                        |                       |                              | p value |
|------------------------------------------------------------------------|--------------------------|------------------------|-----------------------|------------------------------|---------|
|                                                                        | England                  | Scotland               | Wales                 | Northern Ireland             |         |
| <i>Alternative providers of health services</i>                        | 200 (160 – 394)          | 700 (360 – 1,100)      | n/a                   | 600 (550 – 600)              | 0.004*  |
| <i>Charities and other third-sector organisations†</i>                 | 223.52 (157 – 487.2)     | 1700 (377.5 – 6,250)   | 120 (120 – 180)       | n/a                          | 0.001*  |
| <i>Education and research providers</i>                                | 1000 (333.34 – 4,798.40) | 1152 (400 – 2,880)     | 336 (175.2 – 1000)    | 1100 (873.75 – 3525)         | 0.001*  |
| <i>Formal bodies representing healthcare professionals</i>             | 200 (160 – 259.8)        | 213.6 (211.4 – 214.8)  | 120 (96 – 142)        | 1066.67 (933.33 – 1200.00)   | <.000*  |
| <i>Healthcare commissioning, planning and regulatory organisations</i> | 208.17 (160 – 307.2)     | 240 (131.18 – 500)     | 225 (114.24 – 486.39) | 1500 (470.8 – 4,087)         | 0.008*  |
| <i>Patient organisations</i>                                           | 4000 (500 – 11,104)      | 1000 (253.68 – 9,745)  | 747.93 (500 – 2,000)  | 650 (600 – 1,450)            | 0.011*  |
| <i>Private companies other than providers of health services</i>       | 300 (196.8 – 598.92)     | 1,200 (350 – 5,528.88) | 1475 (216 – 6,600)    | 4179.38 (1,152.19 – 7,687.5) | <.000*  |

|                                                               |                         |                         |                      |                      |        |
|---------------------------------------------------------------|-------------------------|-------------------------|----------------------|----------------------|--------|
| <i>Private sector healthcare providers</i>                    | 240 (166 – 588)         | 647.54 (206.65 – 1,500) | 440 (360.94 – 1,732) | 38.49 (28.9 – 485)   | <.000* |
| <i>Professional organisations</i>                             | 500 (240 – 3,200)       | 450 (285.67 – 980)      | 400 (280 – 800)      | 600 (320 – 1,784)    | 0.001* |
| <i>Public administration and providers of public services</i> | 394.4 (224.45 – 546.67) | 540 (200 – 600)         | n/a                  | n/a                  | 0.238  |
| <i>Public sector primary care providers</i>                   | 434.5 (193.6 – 869)     | 434.5 (202.23 – 651.75) | 800 (434.5 – 1,152)  | 600 (434.5 – 1,600)  | <.000* |
| <i>Public sector secondary and tertiary care providers</i>    | 233.17 (141.87 – 500)   | 300 (189.75 – 612)      | 253.66 (200 – 954)   | 288 (163.4 – 490.13) | 0.055  |

\*Statistically significant

†Excluding providers of health services, professional organisations and patient organisations

#### *Extent of company connections in targeted recipient types in each country*

Companies shared 5.8 common recipients on average among England's public sector secondary and tertiary care providers (Table 4), which also received the most funding. These patterns could be a function of the number of research-active NHS trusts located in England<sup>83</sup>, meaning service providers might be very effective at getting donor funds, but also suggest a high degree of targeting by industry. Notably, although healthcare commissioning, planning and regulatory organisations, primarily clinical commissioning groups responsible for the planning and purchasing of local health care services<sup>84</sup>, received very little funding in England, companies frequently target the same recipients, indicating that low funding does not infer an absence of interest.

In Scotland and Wales, companies targeted the same healthcare commissioning, planning and regulatory organisations most frequently, consistent with the financial prioritisation. In Northern Ireland, the density score for public sector primary care providers was higher than the other countries, suggesting some companies have overlapping interests in specific recipients in pockets of Northern Ireland's primary care system. In Wales, Scotland and Northern Ireland in particular, these patterns of common recipients pose a potentially greater risk to certain areas of the healthcare ecosystem becoming vulnerable to influence given the much smaller population the organisations serve.

Table 4. Density scores for valued recipient type networks in each country

| Recipient type                                                         | Density scores* |          |       |                  |
|------------------------------------------------------------------------|-----------------|----------|-------|------------------|
|                                                                        | England         | Scotland | Wales | Northern Ireland |
| <i>Alternative providers of health services</i>                        | 0.339†          | 0.500    | -     | 0.000            |
| <i>Charities and other third-sector organisations</i>                  | 0.510           | 0.333    | 0.476 | -                |
| <i>Education and research providers</i>                                | 1.194           | 0.727    | 0.675 | 1.000            |
| <i>Formal bodies representing healthcare professionals</i>             | 1.293           | 0.000    | 0.400 | 0.000            |
| <i>Healthcare commissioning, planning and regulatory organisations</i> | 2.523           | 1.578    | 1.634 | 0.133            |



|                                                                  |       |       |       |       |
|------------------------------------------------------------------|-------|-------|-------|-------|
| <i>Patient organisations</i>                                     | 0.337 | 0.200 | 0.109 | 0.209 |
| <i>Private companies other than providers of health services</i> | 0.312 | 0.121 | 0.071 | 0.000 |
| <i>Private sector healthcare providers</i>                       | 0.416 | 0.167 | 0.167 | 0.067 |
| <i>Professional organisations</i>                                | 0.611 | 0.244 | 0.114 | 0.038 |
| <i>Public administration and providers of public services</i>    | 0.022 | 0.300 | 0.000 | -     |
| <i>Public sector primary care providers</i>                      | 0.893 | 0.038 | 0.124 | 1.600 |
| <i>Public sector secondary and tertiary care providers</i>       | 5.819 | 1.309 | 1.000 | 0.826 |

\* Density scores measure the average number of common recipients between two companies. The network matrix for each recipient type consisted only of companies making payments. Dashes indicate no payments were made. Scores of 0.000 indicate all recipients received payments from one company only.

†Example interpretation: a score of 0.339 indicates that each company making payments to alternative providers of health services funded, on average, 0.3 recipients in common with another company.

### *Prioritised payment types in each country*

Another dimension of structure that differed between countries was the type of payments (Figure 2). Donations and grants, such as medical and educational goods, were consistently prioritised, however there was notable diversity between countries among the remaining payment types. Payments for joint working, defined as initiatives involving shared investment by the NHS and pharmaceutical companies<sup>85</sup>, varied from 19.61% of all payments in Wales to 2.29% in Northern Ireland; fees for service and consultancy varied from 33.78% in Scotland to 4.86% in Northern Ireland; and contributions to costs of events, such as science or medical focused conferences and educational events, ranged from 31.87% in Northern Ireland to 18.58% in Wales.

### Figure 2. Percentage of total value for each payment type

There was a statistically significant difference between the distribution of payments for costs of events ( $p = .000$ ), which were lowest in Wales (£223) and highest in Northern Ireland (£478), and donations and grants ( $p = <.000$ ), which were lowest in Northern Ireland (£435) and highest in England (£960). Differences in fees for service and consultancy ( $p = .995$ ) and joint working ( $p = .261$ ) were non-significant (see Supplementary File 10).

### **Accuracy of disclosures**

We found evidence of pharmaceutical companies misinterpreting disclosure requirements when we integrated the Disclosure UK and patient organisation data (see Supplementary File 3 for data integration flowchart). We identified 341 payments (1.71% of all payments to organisations in Disclosure UK) to 116 patient organisations (2.88% of all organisations in Disclosure UK) worth £2,458,931.99 (5.21% of the total) incorrectly disclosed as healthcare organisations in Disclosure UK. Of these payments, 50 (14.66%) were duplicated in the

1 patient organisation and Disclosure UK data, which were excluded to ensure no payment  
2 was counted twice.

## 3 4 **DISCUSSION**

### 5 6 **Principle findings**

7 Our findings offer insights into the pharmaceutical industry's strategic approach to  
8 payments tailored to the policy and decision-making context between, and even within,  
9 each country. Our findings also indicate that the pharmaceutical industry's 'web of  
10 influence'<sup>14</sup> can be relatively structured and aligned with key within-country differences in  
11 health system design and processes, as well as cross-nationally. Our comparative analysis  
12 illustrates novel ethical and governance problems as well as commonalities across countries  
13 and confirms concerns that UK-level analysis<sup>25 38</sup> obscures important regional payment  
14 variations and recipient vulnerabilities<sup>16</sup>. The oversight of strategic specificity is important  
15 not least because key decisions about commissioning of health services are taken within  
16 each country<sup>47 61</sup>.

### 17 18 **Findings in context**

19 Our findings align with previous comparative analyses of payments to teaching hospitals<sup>31</sup>  
20 and healthcare professionals in the United States, which show significant payment  
21 differences between regions<sup>20 48 49 86</sup>. Our findings also mirror those from a comparative  
22 study of industry payments to patient organisations in Denmark and Sweden, where larger  
23 payments were more frequent in the smallest country<sup>16</sup>, suggesting a consistent industry  
24 strategy of targeting smaller locations with larger payments.

25  
26 The concentration of payments among a few companies in each country was also consistent  
27 with previous studies of patient organisations<sup>16 38 87</sup> and healthcare organisations<sup>25 31 61</sup>. We  
28 identified Pfizer as a top donor, targeting many 'popular' recipients in all four UK countries,  
29 however it remains unclear if this relates to a particular product launch<sup>40 88</sup>, a new push  
30 relative to emerging competition, or reflects a consistent trend. Further interpretation  
31 would be facilitated by longitudinal analysis. There were also differences in the companies  
32 providing the most funding, particularly in Northern Ireland where the top donors were  
33 similar to those making payments to healthcare organisations in the Republic of Ireland<sup>28</sup>  
34 rather than the other three UK countries, indicating that some companies may strategically  
35 target organisations on the island. One isolated case was Napp Pharmaceuticals, which  
36 featured as both a top donor and top-most connected company uniquely in Northern  
37 Ireland, suggesting that specific companies can dominate payment networks in relation to  
38 smaller countries under the radar. These instances may have direct implications for public  
39 health. For example, Napp Pharmaceuticals is an opioid manufacturer<sup>89</sup> and opioid  
40 manufacturers in the United States have been known to leverage targeted funding,  
41 including to teaching hospitals<sup>31</sup>, to increase opioid prescribing<sup>90</sup>.

42  
43 Discrepancies in the types of payments prioritised also point towards sub-national  
44 vulnerabilities in each countries' healthcare ecosystem. In Wales, the prioritisation of joint  
45 working raises concerns around the extent of pharmaceutical industry involvement in  
46 healthcare design. Joint working arrangements are intended to bring benefits to patients,  
47 the NHS, and companies, however many of these projects mention increasing the use of

1  
2  
3 1 company products<sup>91</sup>, potentially serving as an alternative avenue for industry marketing.  
4 2 Similarly, in Northern Ireland, costs of events were higher than the other countries, pointing  
5 3 towards an alternative channel for industry involvement in continuing medical education in  
6 4 a country with fewer professional organisations or large universities. This pattern of  
7 5 frequent event payments was also observed in the Republic of Ireland<sup>28</sup>, further indicating  
8 6 island-specific trends.  
9  
10  
11

### 12 8 **Lessons for transparency**

13 9 The transparency concerns we identified are consistent with previous studies of  
14 10 pharmaceutical industry disclosure practices in the UK<sup>4 42</sup> and Europe<sup>35 41</sup>. Although the UK's  
15 11 self-regulatory payment disclosure system is the most robust in Europe<sup>17 92</sup>, our analysis  
16 12 confirms earlier concerns about some payments being disclosed on the incorrect platform  
17 13 and thereby preventing their correct identification by policymakers, regulators, and  
18 14 members of the public<sup>39 42</sup>. Our findings indicate that some instances of under-reporting<sup>39</sup>  
19 15 may be explained by confusion about where to report.  
20  
21  
22

23 17 These issues, coupled with the extensive additional research required to standardise and  
24 18 categorise recipient types and their locations in the UK, indicate that the self-regulatory  
25 19 system is incomplete and requires better integration. This could be achieved through a  
26 20 single standardised database comprising all pharmaceutical industry payments and  
27 21 combining the highest standards of reporting as they currently apply to, separately,  
28 22 healthcare and patient organisations. For example, EFPIA requires individual disclosures of  
29 23 payments to patient organisations to include descriptions of funded activities<sup>42</sup>, a provision  
30 24 that should be extended to healthcare organisations. As a minimum, compulsory recipient  
31 25 identifiers should be introduced<sup>35</sup> to reduce the substantial forensic work involved in  
32 26 cleaning these data and encourage longitudinal comparisons. Echoing calls in the US for  
33 27 state-specific disclosure policies<sup>51</sup>, Disclosure UK and disclosures of payments to patient  
34 28 organisations need to be adapted to better capture the distinction between payments in  
35 29 England, Scotland, Wales, and Northern Ireland.  
36  
37  
38  
39

40 31 Whilst baseline improvements in data accessibility and quality are imperative, a central  
41 32 database should also contain associated analytics, including descriptive and network  
42 33 statistics. Otherwise, we run the risk that pharmaceutical companies themselves gain more  
43 34 from the payment disclosure system than the public, as companies use disclosures to inform  
44 35 and fine-tune their marketing efforts<sup>93 67</sup>.  
45  
46  
47

### 47 37 **Strengths and limitations**

48 38 This is the first study to jointly analyse payments to healthcare and patient organisations,  
49 39 which was made possible by the current UK transparency provisions. It also is the first of its  
50 40 kind to explore payments across the four UK countries. To date, the spotlight has been on  
51 41 individual COIs, which may downplay the systemic problem of a broader institutional culture  
52 42 whereby industry funding is embraced and industry interests can be advanced<sup>14 90</sup>.  
53 43 However, our study has limitations. We focus only on 2015 data due to the substantial time  
54 44 required to prepare Disclosure UK data for effective analysis, particularly categorising  
55 45 recipients to make them distinguishable, and identifying recipient countries. We can assume  
56 46 the patterns are maintained over time as the overall payment values have remained stable  
57 47 each year<sup>38 94</sup>, however longitudinal analysis would confirm this. Also, we could not

1  
2  
3 1 determine whether sharing recipients was accidental or intentional, nor did we measure the  
4 2 impact of these payments.  
5  
6 3

7 4 **Conclusion**

8 5 Regional variability in payments has implications for sub-national policymaking<sup>51</sup> and it  
9 6 appears that there are specific vulnerabilities to institutional COIs arising at a sub-national  
10 7 level. These payment differences may also be occurring in other countries, particularly those  
11 8 with decentralised health system structures and/or high levels of independence across their  
12 9 decision-making authorities. Future research could examine factors contributing to regional  
13 10 payment differences to better inform future government or industry policies to mitigate  
14 11 against undue influence.  
15  
16  
17  
18  
19  
20  
21  
22  
23  
24  
25  
26  
27  
28  
29  
30  
31  
32  
33  
34  
35  
36  
37  
38  
39  
40  
41  
42  
43  
44  
45  
46  
47  
48  
49  
50  
51  
52  
53  
54  
55  
56  
57  
58  
59  
60

For peer review only

### **Ethical approval**

The study did not require ethical approval (as it draws on publicly available data at the organisational level), however it is part of a bigger project which has ethical approval from the University of Bath's Social Sciences Research Ethics Committee (approval code: S19-073).

### **Funding statement**

ER's work was supported by a +3 PhD Studentship award match-funded (50%) by the Economic and Social Research Council and the University of Bath. This work forms part of the PhD project. PO's work was supported by grants from The Swedish Research Council for Health, Working Life and Welfare (FORTE), no. 2016-00875, and The Swedish Research Council (VR), no. 2020-01822.

### **Competing interests statement**

ER and EC have no conflicts of interests to declare. PO's PhD student was supported by a grant from Sigma Pharmaceuticals, a UK pharmacy wholesaler and distributor (not a pharmaceutical company). The PhD work funded by Sigma Pharmaceuticals is unrelated to the subject of this paper.

### **Author contributions**

ER designed, managed, analysed and interpreted the data, as well as drafted the article. PO conceived and designed the study, provided supervision, and drafted the article. EC co-supervised the analysis and contributed to drafting the article.

### **Data availability statement**

All data relevant to the study are included in the article or uploaded as supplementary information. The authors of this study agree to share data underpinning this study in the form of an Excel database available from the University of Bath Research Data Archive. The raw data poses no risk to anonymity of individuals as it draws on publicly available reports concerning financial transfers between organisations. The reference for this dataset is: Rickard, E., Ozieranski, P., 2023. *Dataset for "Comparing pharmaceutical company payments in the four UK countries: a cross-sectional and social network analysis"*. Bath: University of Bath Research Data Archive. <https://doi.org/10.15125/BATH-01239>.

1  
2  
3  
4  
5  
6  
7  
8  
9  
10  
11  
12  
13  
14  
15  
16  
17  
18  
19  
20  
21  
22  
23  
24  
25  
26  
27  
28  
29  
30  
31  
32  
33  
34  
35  
36  
37  
38  
39  
40  
41  
42  
43  
44  
45  
46  
47  
48  
49  
50  
51  
52  
53  
54  
55  
56  
57  
58  
59  
60  
**REFERENCES**

1. Lexchin J. Pharmaceutical company spending on research and development and promotion in Canada, 2013-2016: a cohort analysis. *J Pharm Policy Pract* 2018;11:5-5. doi: 10.1186/s40545-018-0132-3
2. AHIP. New Study: In the Midst of COVID-19 Crisis, 7 out of 10 Big Pharma Companies Spent More on Sales and Marketing than R&D 2021 [Available from: <https://www.ahip.org/news/articles/new-study-in-the-midst-of-covid-19-crisis-7-out-of-10-big-pharma-companies-spent-more-on-sales-and-marketing-than-r-d>].
3. Swanson A. Big pharmaceutical companies are spending far more on marketing than research. *The Washington Post*, 2015.
4. Mulinari S, Ozieranski P. Disclosure of payments by pharmaceutical companies to healthcare professionals in the UK: analysis of the Association of the British Pharmaceutical Industry's Disclosure UK database, 2015 and 2016 cohorts. *BMJ Open* 2018;8(10):e023094. doi: 10.1136/bmjopen-2018-023094
5. Rodwin MA. Conflict of Interest in the Pharmaceutical Sector: A Guide for Public Management. *DePaul J Health Care L* 2019;21
6. Humphreys K, Shover CL, Andrews CM, et al. Responding to the opioid crisis in North America and beyond: recommendations of the Stanford-Lancet Commission. *The Lancet* 2022;399(10324):555-604. doi: 10.1016/S0140-6736(21)02252-2
7. Lo YL. Further insights on institutional conflicts of interest in research settings. *Proceedings of Singapore Healthcare* 2020;29(1):3-4. doi: 10.1177/2010105820909983
8. Schafer A. Institutional conflict of interest: attempting to crack the deferiprone mystery. *Journal of Medical Ethics* 2021;47(8):531. doi: 10.1136/medethics-2019-105498
9. Lo B, Field MJ. Conflict of interest in medical research, education, and practice. 2009
10. Lemmens T, Miller PB. The human subjects trade: ethical and legal issues surrounding recruitment incentives. *J Law Med Ethics* 2003;31(3):398-418. doi: 10.1111/j.1748-720x.2003.tb00103.x [published Online First: 2003/11/25]
11. Moynihan R, Bero L. Toward a Healthier Patient Voice: More Independence, Less Industry Funding. *JAMA Internal Medicine* 2017;177(3):350-51. doi: 10.1001/jamainternmed.2016.9179
12. Sismondo S. Ghost-managed medicine: Big pharma's invisible hands: Mattering Press 2018:8.
13. Rickard E, Ozieranski P. A hidden web of policy influence: The pharmaceutical industry's engagement with UK's All-Party Parliamentary Groups. *PLOS ONE* 2021;16(6):e0252551. doi: 10.1371/journal.pone.0252551
14. Marks JH. The perils of partnership: industry influence, institutional integrity, and public health: Oxford University Press 2019.
15. EFPIA. EFPIA CODE OF PRACTICE, 2019.
16. Mulinari S, Pashley D, Ozieranski P. Advancing international comparison of pharmaceutical industry funding of patient advocacy: Focus on Denmark. *Health Policy* 2022;126(12):1256-62. doi: <https://doi.org/10.1016/j.healthpol.2022.11.003>
17. Mulinari S, Martinon L, Jachiet P-A, et al. Pharmaceutical industry self-regulation and non-transparency: country and company level analysis of payments to healthcare professionals in seven European countries. *Health Policy* 2021;125(7):915-22. doi: <https://doi.org/10.1016/j.healthpol.2021.04.015>

- 1 18. Agrawal S, Brennan N, Budetti P. The Sunshine Act—effects on physicians. *N Engl J Med*  
2 2013;2013(368):2054-57.
- 3 19. Ahmed R, Bae S, Hicks CW, et al. Here Comes the Sunshine: Industry's Payments to  
4 Cardiothoracic Surgeons. *Annals of Thoracic Surgery* 2017;103(2):567-72. doi:  
5 10.1016/j.athoracsur.2016.06.053
- 6 20. Braithwaite J, Frane N, Partan MJ, et al. Review of Industry Payments to General  
7 Orthopaedic Surgeons Reported by the Open Payments Database: 2014 to 2019.  
8 *JAAOS Global Research & Reviews* 2021;5(5)
- 9 21. Fleischman W, Ross JS, Melnick ER, et al. Financial Ties Between Emergency Physicians  
10 and Industry: Insights From Open Payments Data. *Annals of Emergency Medicine*  
11 2016;68(2):153-58.e4. doi: 10.1016/j.annemergmed.2016.01.014
- 12 22. Maruf M, Sidana A, Fleischman W, et al. Financial Relationships between Urologists and  
13 Industry: An Analysis of Open Payments Data. *Urology Practice* 2018;5(3):180-86.  
14 doi: 10.1016/j.urpr.2017.03.012
- 15 23. Slentz DH, Nelson CC, Lichter PR. Characteristics of Industry Payments to  
16 Ophthalmologists in the Open Payments Database. *JAMA Ophthalmology*  
17 2019;137(9):1038-44. doi: 10.1001/jamaophthalmol.2019.2456
- 18 24. Moynihan R, Fabbri A, Parker L, et al. Mixed methods evaluation of workshops for citizen  
19 health advocates about financial conflicts of interests in healthcare. *BMJ Open*  
20 2020;10(5) doi: 10.1136/bmjopen-2019-034195
- 21 25. Ozieranski P, Csanadi M, Rickard E, et al. Analysis of Pharmaceutical Industry Payments  
22 to UK Health Care Organizations in 2015. *JAMA Network Open* 2019;2(6):e196253-  
23 e53. doi: 10.1001/jamanetworkopen.2019.6253
- 24 26. Parker L, Karanges EA, Bero L. Changes in the type and amount of spending disclosed by  
25 Australian pharmaceutical companies: an observational study. *BMJ open*  
26 2019;9(2):e024928.
- 27 27. Fabbri A, Grundy Q, Mintzes B, et al. A cross-sectional analysis of pharmaceutical  
28 industry-funded events for health professionals in Australia. *BMJ open*  
29 2017;7(6):e016701.
- 30 28. Moriarty F, Larkin J, Fahey T. Payments reported by the pharmaceutical industry in  
31 Ireland from 2015 to 2019: an observational study. *Health Policy* 2021 doi:  
32 <https://doi.org/10.1016/j.healthpol.2021.07.016>
- 33 29. Ozaki A, Saito H, Senoo Y, et al. Overview and transparency of non-research payments to  
34 healthcare organizations and healthcare professionals from pharmaceutical  
35 companies in Japan: Analysis of payment data in 2016. *Health Policy*  
36 2020;124(7):727-35. doi: <https://doi.org/10.1016/j.healthpol.2020.03.011>
- 37 30. Ozaki A, Saito H, Onoue Y, et al. Pharmaceutical payments to certified oncology  
38 specialists in Japan in 2016: a retrospective observational cross-sectional analysis.  
39 *BMJ Open* 2019;9(9):e028805. doi: 10.1136/bmjopen-2018-028805
- 40 31. Anderson TS, Gellad WF, Good CB. Characteristics of biomedical industry payments to  
41 teaching hospitals. *Health Affairs* 2020;39(9):1583-91. doi:  
42 10.1377/hlthaff.2020.00385
- 43 32. Association of the British Pharmaceutical Industry. Working with patients and patient  
44 organisations. A sourcebook for industry, 2022.
- 45 33. McCoy MS, Carniol M, Chockley K, et al. Conflicts of interest for patient-advocacy  
46 organizations. *New England Journal of Medicine* 2017;376(9):880-85.

- 1  
2  
3  
4 1 34. Rose SL, Highland J, Karafa MT, et al. Patient Advocacy Organizations, Industry Funding,  
5 2 and Conflicts of Interest. *JAMA Internal Medicine* 2017;177(3):344-50. doi:  
6 3 10.1001/jamainternmed.2016.8443  
7 4 35. Ozieranski P, Martinon, L., Jachiet, P., Mulinari, S. Accessibility and quality of drug  
8 5 company disclosures of payments to healthcare professionals and organisations in  
9 6 37 countries: A European policy review. *BMJ Open* 2021  
10 7  
11 7 36. Fabbri A, Parker L, Colombo C, et al. Industry funding of patient and health consumer  
12 8 organisations: systematic review with meta-analysis. *BMJ* 2020;368:l6925. doi:  
13 9 10.1136/bmj.l6925  
14 10 37. EFPIA. EFPIA CODE OF PRACTICE ON RELATIONSHIPS BETWEEN THE PHARMACEUTICAL  
15 11 INDUSTRY AND PATIENT ORGANISATIONS, 2011.  
16 12 38. Ozieranski P, Rickard E, Mulinari S. Exposing drug industry funding of UK patient  
17 13 organisations. *BMJ* 2019;365:l1806. doi: 10.1136/bmj.l1806  
18 14 39. Ozieranski P, Csanadi M, Rickard E, et al. Underreporting of drug industry payments to  
19 15 patient organisations in the UK (2012-2016). 2020  
20 16 40. Mulinari S, Vilhelmsson A, Rickard E, et al. Five years of pharmaceutical industry funding  
21 17 of patient organisations in Sweden: Cross-sectional study of companies, patient  
22 18 organisations and drugs. *PLOS ONE* 2020;15(6):e0235021. doi:  
23 19 10.1371/journal.pone.0235021  
24 20 41. Pashley D OP, Mulinari S. . Disclosure of pharmaceutical industry funding of patient  
25 21 organizations in Nordic countries: can industry self-regulation deliver on its  
26 22 transparency promise? *International Journal of Health Services* 2022  
27 23 42. Rickard E, Ozieranski P, Mulinari S. Evaluating the transparency of pharmaceutical  
28 24 company disclosure of payments to patient organisations in the UK. *Health Policy*  
29 25 2019;123(12):1244-50.  
30 26 43. EFPIA. The EFPIA Disclosure Code: Your Questions Answered, 2014.  
31 27 44. Association of the British Pharmaceutical Industry. Definitions - Disclosure 2022  
32 28 [Available from: [https://www.abpi.org.uk/reputation/disclosure-uk/about-](https://www.abpi.org.uk/reputation/disclosure-uk/about-disclosure-uk/definitions-disclosure/)  
33 29 [disclosure-uk/definitions-disclosure/](https://www.abpi.org.uk/reputation/disclosure-uk/about-disclosure-uk/definitions-disclosure/).  
34 30 45. Keller AC, Packel L. Going for the cure: patient interest groups and health advocacy in  
35 31 the United States. *J Health Polit Policy Law* 2014;39(2):331-67. doi:  
36 32 10.1215/03616878-2416238 [published Online First: 2013/12/07]  
37 33 46. Hegde D, Sampat B. Can private money buy public science? Disease group lobbying and  
38 34 federal funding for biomedical research. *Management Science* 2015;61(10):2281-98.  
39 35 47. Moberly T. CCGs fail to declare pharma funding. *BMJ* 2018;360:j5911. doi:  
40 36 10.1136/bmj.j5911  
41 37 48. Niforatos JD, Boas S, Hertz S, et al. Analysis of current financial relationships between  
42 38 emergency physicians and industry. *American Journal of Emergency Medicine*  
43 39 2019;37(4):722-25. doi: 10.1016/j.ajem.2018.12.039  
44 40 49. Cheng T, Boelitz K, Rybin D, et al. Nationwide patterns in industry payments to academic  
45 41 vascular surgeons. *Journal of Vascular Surgery* 2021;73(2):675-81. doi:  
46 42 10.1016/j.jvs.2020.04.527  
47 43 50. Garstka ME, Monlezun D, DuCoin C, et al. The Sunshine Act and surgeons: a nation-wide  
48 44 analysis of industry payments to physicians. *Journal of Surgical Research*  
49 45 2019;233:41-49. doi: 10.1016/j.jss.2018.07.004  
50  
51  
52  
53  
54  
55  
56  
57  
58  
59  
60



- 1  
2  
3  
4  
5  
6  
7  
8  
9  
10  
11  
12  
13  
14  
15  
16  
17  
18  
19  
20  
21  
22  
23  
24  
25  
26  
27  
28  
29  
30  
31  
32  
33  
34  
35  
36  
37  
38  
39  
40  
41  
42  
43  
44  
45  
46  
47  
48  
49  
50  
51  
52  
53  
54  
55  
56  
57  
58  
59  
60
- 1 51. Cuomo RE, Cai M, Shah N, et al. Physicians payment in the United States between 2014  
2 and 2018: An analysis of the CMS Open Payments database. *PLOS ONE*  
3 2021;16(6):e0252656. doi: 10.1371/journal.pone.0252656
  - 4 52. Mejia J, Mejia A, Pestilli F. Open data on industry payments to healthcare providers  
5 reveal potential hidden costs to the public. *Nature Communications* 2019;10(1) doi:  
6 10.1038/s41467-019-12317-z
  - 7 53. Ozieranski P, Pitter J, Rickard E, et al. A “patient-industry complex”? Investigating the  
8 financial dependency of UK patient organisations on drug company funding.  
9 *Sociology of Health & Illness* 2021
  - 10 54. EFPIA. The Pharmaceutical Industry in Figures, 2016.
  - 11 55. Hyndman N. Editorial: The charity sector— changing times, changing challenges. *Public*  
12 *Money & Management* 2017;37(3):149-53. doi: 10.1080/09540962.2017.1281608
  - 13 56. Greer SL. Territorial politics and health policy: UK health policy in comparative  
14 perspective: Manchester University Press 2004.
  - 15 57. Birrell D. Comparing devolved governance: Palgrave Macmillan 2012.
  - 16 58. Cheung A, Paun A, Valsamidis L. Devolution at 20. Institute for Government, 2019.
  - 17 59. ONS. Population estimates for the UK, England and Wales, Scotland and Northern  
18 Ireland: mid-2015 2016 [Available from:  
19 [https://www.ons.gov.uk/peoplepopulationandcommunity/populationandmigration/](https://www.ons.gov.uk/peoplepopulationandcommunity/populationandmigration/populationestimates/bulletins/annualmidyearpopulationestimates/mid2015)  
20 [populationestimates/bulletins/annualmidyearpopulationestimates/mid2015](https://www.ons.gov.uk/peoplepopulationandcommunity/populationandmigration/populationestimates/bulletins/annualmidyearpopulationestimates/mid2015)  
21 accessed 13th September 2021.
  - 22 60. Office for National Statistics. Life expectancy for local areas of the UK: between 2001 to  
23 2003 and 2017 to 2019 2020 [Available from:  
24 [https://www.ons.gov.uk/peoplepopulationandcommunity/healthandsocialcare/health](https://www.ons.gov.uk/peoplepopulationandcommunity/healthandsocialcare/healthandlifeexpectancies/bulletins/lifeexpectancyforlocalareasoftheuk/between2001to2003and2017to2019)  
25 [handlifeexpectancies/bulletins/lifeexpectancyforlocalareasoftheuk/between2001to](https://www.ons.gov.uk/peoplepopulationandcommunity/healthandsocialcare/healthandlifeexpectancies/bulletins/lifeexpectancyforlocalareasoftheuk/between2001to2003and2017to2019)  
26 [2003and2017to2019](https://www.ons.gov.uk/peoplepopulationandcommunity/healthandsocialcare/healthandlifeexpectancies/bulletins/lifeexpectancyforlocalareasoftheuk/between2001to2003and2017to2019) accessed 28th August 2021.
  - 27 61. Saghy E, Mulinari S, Ozieranski P. Drug company payments to General Practices in  
28 England: cross-sectional and social network analysis. *PLOS ONE* 2021
  - 29 62. Kirchhof P. A tale of two countries: how decentralized organization and long-term  
30 investment build resilient healthcare systems. *Eur Heart J Qual Care Clin Outcomes*  
31 2020;6(3):201-03. doi: 10.1093/ehjqcco/qcaa036 [published Online First:  
32 2020/05/07]
  - 33 63. Martin-Moreno JM, Alonso P, Claveria A, et al. Spain: a decentralised health system in  
34 constant flux. *BMJ* 2009;338:b1170. doi: 10.1136/bmj.b1170
  - 35 64. Rahul A. ea. Leveraging CMS Open Payments Data to Identify Channel Preferences and  
36 Gather Competitive Intelligence, Thereby Improving HCP Targeting. *Pharmaceutical*  
37 *Management Science Association* 2021
  - 38 65. Hollands S. Receipt of Promotional Payments at the Individual and Physician Network  
39 Level Associated with Higher Branded Antipsychotic Prescribing Rates. *Adm Policy*  
40 *Ment Health* 2020;47(1):73-85. doi: 10.1007/s10488-019-00974-7
  - 41 66. Agha L, Zeltzer D. DRUG DIFFUSION THROUGH PEER NETWORKS: THE INFLUENCE OF  
42 INDUSTRY PAYMENTS. *NBER WORKING PAPER SERIES* 2020;Working Paper 26338
  - 43 67. Anand R CD, Yan J, et al. Leveraging CMS Open Payments Data to Identify Channel  
44 Preferences and Gather Competitive Intelligence, Thereby Improving HCP Targeting.  
45 *Journal of the Pharmaceutical Management Science Association* 2017 doi:  
46 <https://www.pmsa.org/jpmsa-vol05-article06>

- 1  
2  
3 1 68. Mulinari S, Ozieranski P. Capitalizing on transparency: Commercial surveillance and  
4 2 pharmaceutical marketing after the Physician Sunshine Act. *Big Data & Society*  
5 3 2022;9(1):20539517211069631. doi: 10.1177/20539517211069631  
6 4  
7 4 69. Oldani MJ. Tales From The" Script": An Insider/Outside View Of Pharmaceutical Sales  
8 5 Practice. *Kroeber Anthropological Society Papers* 2002:147-76.  
9 6  
10 6 70. Association of the British Pharmaceutical Industry. CODE OF PRACTICE for the  
11 7 PHARMACEUTICAL INDUSTRY 2015, 2015.  
12 8  
13 8 71. Dunn OJ. Multiple Comparisons Using Rank Sums. *Technometrics* 1964;6(3):241-52. doi:  
14 9 10.1080/00401706.1964.10490181  
15 10  
16 10 72. Baadh AS, Baadh PK, Islam S, et al. IR and the Sunshine Act: Two-Year Analysis of the  
17 11 Open Payments Database and Comparison with Related Specialties. *Journal of*  
18 12 *Vascular and Interventional Radiology* 2017;28(2):200-05. doi:  
19 13 10.1016/j.jvir.2016.10.008  
20 14  
21 14 73. Morse E, Fujiwara RJT, Mehra S. Increasing Industry Involvement in Otolaryngology:  
22 15 Insights from 3 Years of the Open Payments Database. *Otolaryngology - Head and*  
23 16 *Neck Surgery (United States)* 2018;159(3):501-07. doi: 10.1177/0194599818778502  
24 17  
25 17 74. Baadh AS, Patel M, Patel K, et al. Medical industry at tumor board: Three-years analysis  
26 18 of the open payments database and comparison of oncologic specialties. *Journal of*  
27 19 *Surgical Oncology* 2018;117(4):551-57. doi: 10.1002/jso.24899  
28 20  
29 20 75. Borgatti SP, Everett MG, Johnson JC. Analyzing social networks: Sage 2018.  
30 21  
31 21 76. Snijders TA, Faye M, Brailly J. Network dynamics with a nested node set: Sociability in  
32 22 seven villages in Senegal. *Statistica Neerlandica* 2020;74(3):300-23.  
33 23  
34 23 77. Borgatti SP, Everett, M.G. and Freeman, L.C. . Ucinet for Windows: Software for Social  
35 24 Network Analysis. Harvard, MA: Analytic Technologies 2002.  
36 25  
37 25 78. Borgatti S. Centrality and Centralization 2000 [Available from:  
38 26 <http://www.analytictech.com/mb119/chapter5.htm> accessed 20th July 2021.  
39 27 [dataset] 79. Rickard E, Ozieranski, P.,. Dataset for "Comparing pharmaceutical company  
40 28 payments in the four UK countries: a cross-sectional and social network analysis":  
41 29 Bath: University of Bath Research Data Archive, 2023.  
42 30  
43 30 80. Welsh Government. NHS Wales health boards and trusts 2022 [Available from:  
44 31 <https://www.gov.wales/nhs-wales-health-boards-and-trusts>.  
45 32  
46 32 81. NHS Scotland. NHSScotland Health Boards 2022 [Available from:  
47 33 [https://www.careers.nhs.scot/careers/find-your-career/international-](https://www.careers.nhs.scot/careers/find-your-career/international-recruitment/nhsscotland-health-boards/)  
48 34 [recruitment/nhsscotland-health-boards/](https://www.careers.nhs.scot/careers/find-your-career/international-recruitment/nhsscotland-health-boards/).  
49 35  
50 35 82. Foundation Trust Network. BUILDING A HEALTHY NHS AROUND PEOPLE'S NEEDS. AN  
51 36 INTRODUCTION TO NHS FOUNDATION TRUSTS AND TRUSTS, 2015.  
52 37  
53 37 83. Noclор. EVERY NHS TRUST IN ENGLAND IS NOW RESEARCH-ACTIVE 2022 [Available from:  
54 38 <https://www.noclор.nhs.uk/every-nhs-trust-england-now-research-active>.  
55 39  
56 39 84. NHS Confederation. What are clinical commissioning groups? 2021 [Available from:  
57 40 <https://www.nhsconfed.org/articles/what-are-clinical-commissioning-groups>.  
58 41  
59 41 85. Association of the British Pharmaceutical Industry. Joint Working: A toolkit for industry  
60 42 and the NHS, 2019.  
61 43  
62 43 86. Brauer PR, Morse E, Mehra S. Industry Payments for Otolaryngology Research: A Four-  
63 44 Year Analysis of the Open Payments Database. *Laryngoscope* 2020;130(2):314-20.  
64 45 doi: 10.1002/lary.27896

- 1  
2  
3 1 87. Fabbri A, Swandari S, Lau E, et al. Pharmaceutical industry funding of health consumer  
4 2 groups in Australia: a cross-sectional analysis. *International Journal of Health Services*  
5 3 2019;49(2):273-93.  
6 4  
7 4 88. Baggott R, Allsop J, Jones K. Speaking for patients and carers: health consumer groups  
8 5 and the policy process: Macmillan International Higher Education 2014.  
9 6  
10 6 89. Keefe PR. Empire of pain: The secret history of the Sackler dynasty: Anchor 2021.  
11 7  
12 7 90. Marks JH. Lessons from Corporate Influence in the Opioid Epidemic: Toward a Norm of  
13 8 Separation. *Journal of Bioethical Inquiry* 2020;17(2):173-89. doi: 10.1007/s11673-  
14 9 020-09982-x  
15 10  
16 10 91. Moberly T. NHS joint working with industry is out of public sight. *BMJ* 2019;364:l1353.  
17 11 doi: 10.1136/bmj.l1353  
18 12  
19 12 92. Ozaki POHSERSMA. International comparison of pharmaceutical industry payment  
20 13 disclosures in the UK and Japan: implications for self-regulation, public regulation,  
21 14 and transparency. *Globalization and Health* 2023 doi: 10.1186/s12992-022-00902-9  
22 15  
23 15 93. Kanter GP, Loewenstein G. Evaluating open payments. *Jama* 2019;322(5):401-02.  
24 16  
25 16 94. Association of the British Pharmaceutical Industry. Disclosure UK 2022 [Available from:  
26 17 <https://www.abpi.org.uk/reputation/disclosure-uk/>.  
27 18  
28 19  
29  
30  
31  
32  
33  
34  
35  
36  
37  
38  
39  
40  
41  
42  
43  
44  
45  
46  
47  
48  
49  
50  
51  
52  
53  
54  
55  
56  
57  
58  
59  
60

1  
2  
3  
4  
5  
6  
7  
8  
9  
10  
11  
12  
13  
14  
15  
16  
17  
18  
19  
20  
21  
22  
23  
24  
25  
26  
27  
28  
29  
30  
31  
32  
33  
34  
35  
36  
37  
38  
39  
40  
41  
42  
43  
44  
45  
46  
47  
48  
49  
50  
51  
52  
53  
54  
55  
56  
57  
58  
59  
60

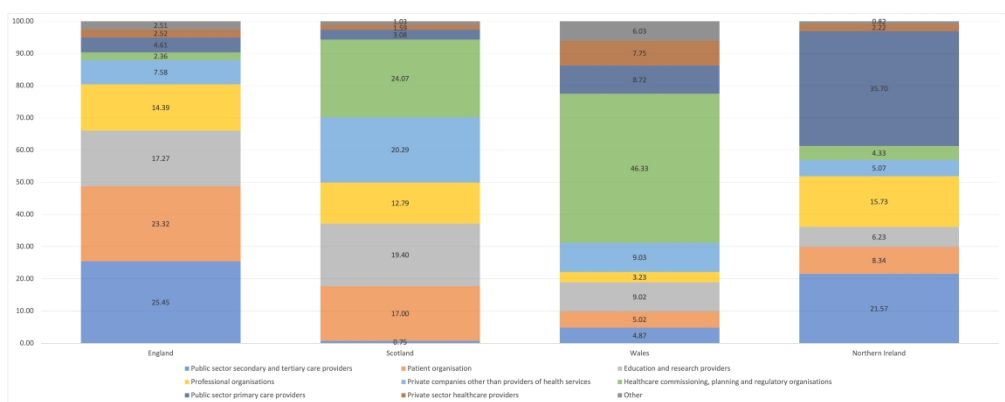

Percentage of payments to recipient types per country

541x213mm (330 x 330 DPI)

1  
2  
3  
4  
5  
6  
7  
8  
9  
10  
11  
12  
13  
14  
15  
16  
17  
18  
19  
20  
21  
22  
23  
24  
25  
26  
27  
28  
29  
30  
31  
32  
33  
34  
35  
36  
37  
38  
39  
40  
41  
42  
43  
44  
45  
46  
47  
48  
49  
50  
51  
52  
53  
54  
55  
56  
57  
58  
59  
60

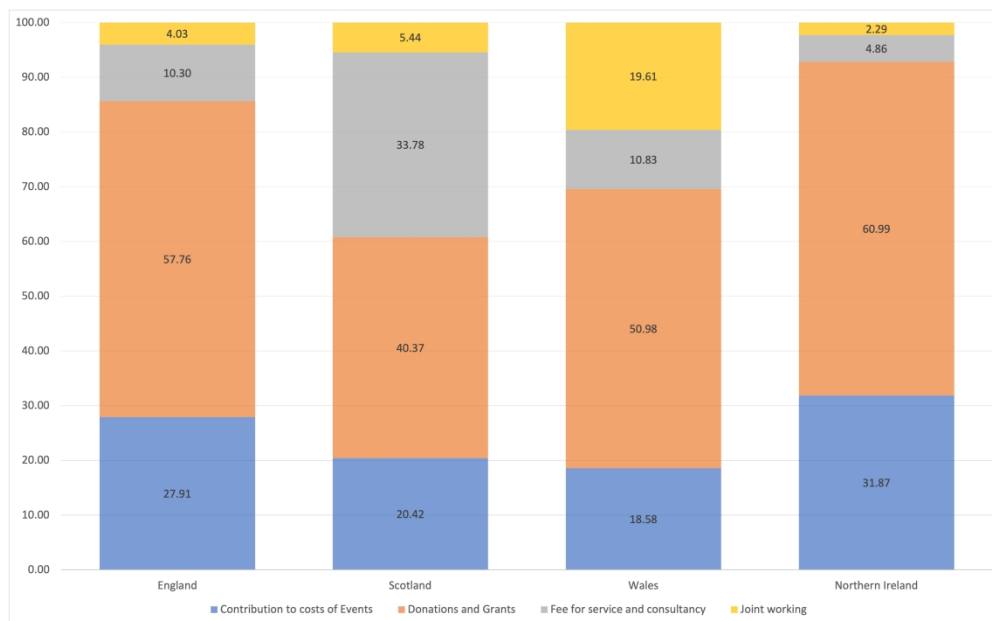

Percentage of total value for each payment type

346x214mm (330 x 330 DPI)

## Supplementary file contents:

| <b>Supplementary File</b>                                                                                                   | <b>Page</b> |
|-----------------------------------------------------------------------------------------------------------------------------|-------------|
| Supplementary File 1. Payment types included in Disclosure UK and patient organisation codes applied to Disclosure UK codes | 2           |
| Supplementary File 2. Data integration flowchart                                                                            | 3           |
| Supplementary File 3. Recipient category descriptions and examples                                                          | 4-5         |
| Supplementary File 4. Top 10% of donors in each country                                                                     | 6           |
| Supplementary File 5. Visualised networks for England (a), Scotland (b), Wales (c), Northern Ireland (d)                    | 7-10        |
| Supplementary File 6. Top ten companies by degree centrality scores in each country                                         | 11          |
| Supplementary File 7. Descriptive statistics for each recipient category                                                    | 12-14       |
| Supplementary File 8. Top 10 recipients in each country                                                                     | 15-16       |
| Supplementary File 9. Post-hoc Bonferroni pairwise comparisons between countries of payments per category                   | 17-19       |
| Supplementary File 10. Post-hoc Bonferroni pairwise comparisons between countries of payment types                          | 20          |

Supplementary File 1. Payment types included in Disclosure UK and patient organisation codes applied to Disclosure UK codes

| Payment type                    | Description of payment type                                                                                                                                                                                                                                                                                                                                                                                                                    | Patient organisation payments subsumed within the payment type                                                                                                                                         |
|---------------------------------|------------------------------------------------------------------------------------------------------------------------------------------------------------------------------------------------------------------------------------------------------------------------------------------------------------------------------------------------------------------------------------------------------------------------------------------------|--------------------------------------------------------------------------------------------------------------------------------------------------------------------------------------------------------|
| Contribution to costs of Events | Contribution to costs related to Events, through HCOs or Third Parties, including support to HCPs to attend Events, such as: <ul style="list-style-type: none"> <li>• Registration fees;</li> <li>• Sponsorship agreements with HCOs or with Third Parties appointed by an HCO to manage an Event; and</li> <li>• Travel and accommodation (EFPIA Code of Practice 2019, p. 30)</li> </ul>                                                     | contributions to costs of events organised by recipients or third parties; travel, accommodation and registration fees                                                                                 |
| Donations and Grants to HCOs    | Donations and Grants to HCOs that support healthcare, including donations and grants (either cash or benefits in kind) to institutions, organisations or associations that are comprised of HCPs and/or that provide healthcare (EFPIA Code of Practice 2019, p. 30)                                                                                                                                                                           | donations; grants; corporate member, supporter, sponsor or partner; purchases and subscriptions from patient organisations; more than one distinct payment form; form of funding unclear; sponsorships |
| Fee for service and consultancy | Payments resulting from or related to contracts between Member Companies and HCOs under which such HCOs provide any type of services to a Member Company or any other type of funding not covered in the previous categories. Fees, on the one hand, and on the other hand payments relating to expenses agreed in the written agreement covering the activity will be disclosed as two separate amounts. (EFPIA Code of Practice 2019, p. 30) | fees for service and consultancy (including travel and accommodation); support, help and contributions                                                                                                 |
| Joint working                   | The Department of Health defines joint working between the NHS and the pharmaceutical industry as situations where, for the benefit of patients, one or more pharmaceutical companies and the NHS pool skills, experience and/or resources for the joint development and implementation of patient centred projects and share a commitment to successful delivery. (ABPI Code of Practice 2015, Clause 20, p. 30)                              | n/a                                                                                                                                                                                                    |

## Supplementary File 2. Data integration flowchart



\*This is the number and value of payments excluded to ensure no payment was counted twice

\*\*During the cleaning process, a number of considerations took place to determine the final number and value of payments to patient organisations. Some duplicate payments were identified that were reported as multiple payments in one dataset and one payment in the other dataset (influencing the final number of payments). Approaches to VAT when reporting values also differed between the two datasets (influencing the final value of payments).



## Supplementary File 3. Recipient category descriptions and examples

| Recipient category                                                                                                                             | Category description                                                                                                                    | Examples (country-specific examples where applicable)                                                                                                                                                                                                                                                                                                                                                                                                                                                                                                                                                                                                                                                                   |
|------------------------------------------------------------------------------------------------------------------------------------------------|-----------------------------------------------------------------------------------------------------------------------------------------|-------------------------------------------------------------------------------------------------------------------------------------------------------------------------------------------------------------------------------------------------------------------------------------------------------------------------------------------------------------------------------------------------------------------------------------------------------------------------------------------------------------------------------------------------------------------------------------------------------------------------------------------------------------------------------------------------------------------------|
| Alternative providers of health services                                                                                                       | Charities, not-for-profit companies, social enterprises and community interest companies providing health services                      | <ul style="list-style-type: none"> <li>- social enterprise delivering primary or secondary care health services</li> <li>- nursing or care home run by a community interest company (CIC)</li> <li>- hospital, hospice, or nursing home with a charitable status</li> </ul>                                                                                                                                                                                                                                                                                                                                                                                                                                             |
| Education and research providers                                                                                                               | Universities, charities, and noncommercial institutes undertaking research                                                              | <ul style="list-style-type: none"> <li>- university</li> <li>- research institute at a NHS organisation</li> <li>- charity focusing on undertaking medical research</li> </ul>                                                                                                                                                                                                                                                                                                                                                                                                                                                                                                                                          |
| Formal bodies representing healthcare professionals or patients                                                                                | Local medical, optical, optometric, or pharmaceutical committees and statutory bodies representing healthcare professionals or patients | <ul style="list-style-type: none"> <li>- local medical committees (LMC)</li> <li>- local optical or optometric committee (LOC)</li> </ul> <p><i>England</i></p> <ul style="list-style-type: none"> <li>- local pharmaceutical committee (LPC)</li> </ul>                                                                                                                                                                                                                                                                                                                                                                                                                                                                |
| Charities and other third-sector organisations (excluding providers of health services, professional organisations, and patient organisations) | Organisations (not patient organisations) focusing on education, research, advocacy, and multipurpose organisations                     | <ul style="list-style-type: none"> <li>- charitable trusts providing medical education events to healthcare professionals</li> <li>- think tanks</li> <li>- third-sector organisation (non-charity) or charity focused on funding medical research</li> <li>- research institute registered as a charitable organisation</li> </ul>                                                                                                                                                                                                                                                                                                                                                                                     |
| Healthcare commissioning, planning and regulatory organisations                                                                                | Local, regional, and commissioning, planning, or regulatory organisations                                                               | <ul style="list-style-type: none"> <li>- primary care trust (PCT)</li> <li>- NHS Shared Business Services</li> <li>- National Institute for Health and Care Excellence (NICE)</li> <li>- Public Health England</li> </ul> <p><i>England</i></p> <ul style="list-style-type: none"> <li>- clinical commissioning group</li> <li>- Locality group</li> <li>- area prescribing committee</li> <li>- local commissioning group</li> <li>- NHS England</li> </ul> <p><i>Scotland</i></p> <ul style="list-style-type: none"> <li>- regional NHS board</li> <li>- area pharmaceutical committee</li> </ul> <p><i>Wales</i></p> <ul style="list-style-type: none"> <li>- health board</li> <li>- public health Wales</li> </ul> |

|                                                           |                                                                                                                                            |                                                                                                                                                                                                                                                                                                                                                                                                                |
|-----------------------------------------------------------|--------------------------------------------------------------------------------------------------------------------------------------------|----------------------------------------------------------------------------------------------------------------------------------------------------------------------------------------------------------------------------------------------------------------------------------------------------------------------------------------------------------------------------------------------------------------|
|                                                           |                                                                                                                                            | <p><i>Northern Ireland</i></p> <ul style="list-style-type: none"> <li>- health and social care board</li> <li>- local commissioning group</li> </ul>                                                                                                                                                                                                                                                           |
| Patient organisations                                     | Organisations focusing on supporting education, research, advocacy, and multipurpose organisations                                         | <ul style="list-style-type: none"> <li>- multipurpose patient organisations</li> <li>- organisations focused on providing patient support</li> <li>- hospital charities</li> </ul>                                                                                                                                                                                                                             |
| Private companies other than providers of health services | Providers of medical communications or training services, commercial or medical research services, and accountancy or consultancy services | <ul style="list-style-type: none"> <li>- manufacturer or supplier of medical devices or technologies</li> <li>- pharmacy wholesaler or distributor</li> <li>- event management services</li> <li>- journal or publishing company</li> <li>- clinical or contract research organisation</li> <li>- private laboratory</li> </ul>                                                                                |
| Private sector healthcare providers                       | Private clinics and hospitals, healthcare groups, and providers of dental, pharmacy, and optical services                                  | <ul style="list-style-type: none"> <li>- dental practice</li> <li>- pharmacy or chemist</li> <li>- opticians</li> <li>- private clinic, surgery, practice, or hospital</li> <li>- private company providing community health or social care services</li> </ul>                                                                                                                                                |
| Professional organisations                                | Organisations of medical professionals, other healthcare professionals, or non-healthcare professionals,                                   | <ul style="list-style-type: none"> <li>- organisation of medical professionals</li> <li>- professional bodies responsible for setting standards of care and education for medical specialities</li> <li>- royal college - medical professionals</li> <li>- alliance or coalition of professional associations or groups</li> <li>- professional organisation of pharmacists or pharmacy technicians</li> </ul> |
| Public administration and providers of public services    | Central UK government bodies, devolved administrations in Scotland, Wales, and Northern Ireland, and local authorities                     | <ul style="list-style-type: none"> <li>- district, city, country, or borough council</li> <li>- prison</li> <li>- devolved administrations</li> <li>- central government bodies</li> </ul>                                                                                                                                                                                                                     |
| Public sector primary care providers                      | General practitioner surgeries, medical practice centres, groups of surgeries or medical practices, and healthcare or medical groups       | <ul style="list-style-type: none"> <li>- GP practice, surgery, medical practice or family practice</li> <li>- health centre, medical centre or primary care centre</li> <li>- group of surgeries or medical practices</li> </ul>                                                                                                                                                                               |
| Public sector secondary and tertiary care providers       | NHS trusts, NHS hospitals, and networks and collaboratives of NHS organisations                                                            | <ul style="list-style-type: none"> <li>- NHS hospital</li> <li>- NHS Foundation Trust</li> <li>- NHS trust</li> <li>- strategic clinical network (SCN)</li> </ul> <p><i>Scotland</i></p> <ul style="list-style-type: none"> <li>- managed clinical network (MCN)</li> </ul>                                                                                                                                    |

## Supplementary File 4. Top 10% of donors in each country

| Country          | Company (revenue ranking) | Payment value - £ (%) | Payments – n (%) |
|------------------|---------------------------|-----------------------|------------------|
| England          | Pfizer (2)                | 5,292,130.74 (10.09)  | 1636 (8.99)      |
|                  | Novartis (7)              | 3,564,500.43 (6.80)   | 460 (2.53)       |
|                  | Bayer (8)                 | 3,476,304.44 (6.63)   | 2110 (11.60)     |
|                  | GlaxoSmithKline (4)       | 3,291,496.35 (6.28)   | 1076 (5.92)      |
|                  | AstraZeneca (1)           | 2,779,000.54 (5.30)   | 1279 (7.03)      |
|                  | Janssen-Cilag (10)        | 2,387,242.64 (4.55)   | 722 (3.97)       |
|                  | UCB Pharma (30)           | 2,204,967.90 (4.20)   | 74 (0.41)        |
|                  | Astellas Pharma (21)      | 2,044,050.60 (3.90)   | 311 (1.71)       |
|                  | Roche (5)                 | 1,931,651.77 (3.68)   | 173 (0.95)       |
|                  | Biogen Idec (23)          | 1,886,879.26 (3.60)   | 83 (0.46)        |
|                  | Top 10% total             | 28,858,224.67 (55.03) | 7924 (43.56)     |
| Scotland         | Biogen Idec (24)          | 733,104.05 (20.09)    | 7 (0.51)         |
|                  | Takeda UK (38)            | 274,952.71 (7.53)     | 25 (1.82)        |
|                  | Pfizer (2)                | 250,859.45 (6.87)     | 143 (10.44)      |
|                  | Bayer (8)                 | 215,930.76 (5.92)     | 164 (11.97)      |
|                  | Novartis (7)              | 199,703.97 (5.47)     | 48 (3.50)        |
|                  | Bristol-Myers Squibb (23) | 183,959.00 (5.04)     | 51 (3.72)        |
|                  | AstraZeneca (1)           | 178,848.49 (4.90)     | 75 (5.47)        |
|                  | Top 10% total             | 2,037,358.42 (55.82)  | 513 (37.45)      |
| Wales            | Pfizer (2)                | 284,719.57 (14.32)    | 102 (10.30)      |
|                  | Roche (5)                 | 230,090.90 (11.58)    | 10 (1.01)        |
|                  | Novartis (7)              | 177,069.59 (8.91)     | 36 (3.64)        |
|                  | AstraZeneca (1)           | 148,288.67 (7.46)     | 79 (7.98)        |
|                  | Janssen-Cilag (10)        | 122,237.44 (6.15)     | 22 (2.22)        |
|                  | Biogen (24)               | 112,428.62 (5.66)     | 7 (0.71)         |
|                  | Top 10% total             | 1,074,834.80 (54.07)  | 256 (25.86)      |
| Northern Ireland | Sanofi Aventis (13)       | 92,252.80 (17.81)     | 24 (7.72)        |
|                  | Pfizer (2)                | 86,639.31 (16.73)     | 45 (14.47)       |
|                  | Napp Pharmaceuticals (29) | 83,252.29 (16.07)     | 45 (14.47)       |
|                  | Bayer (8)                 | 37,959.50 (7.33)      | 75 (24.12)       |
|                  | Top 10% total             | 300,103.90 (57.94)    | 189 (60.77)      |

\*Value as proportion of all payments in each country

Supplementary File 5. Visualised networks for England (a), Scotland (b), Wales (c), Northern Ireland (d)

Supplementary File 5a. England's network



Supplementary File 5b. Scotland's network



Supplementary File 5c. Wales' network



only

Supplementary File 5d. Northern Ireland’s network

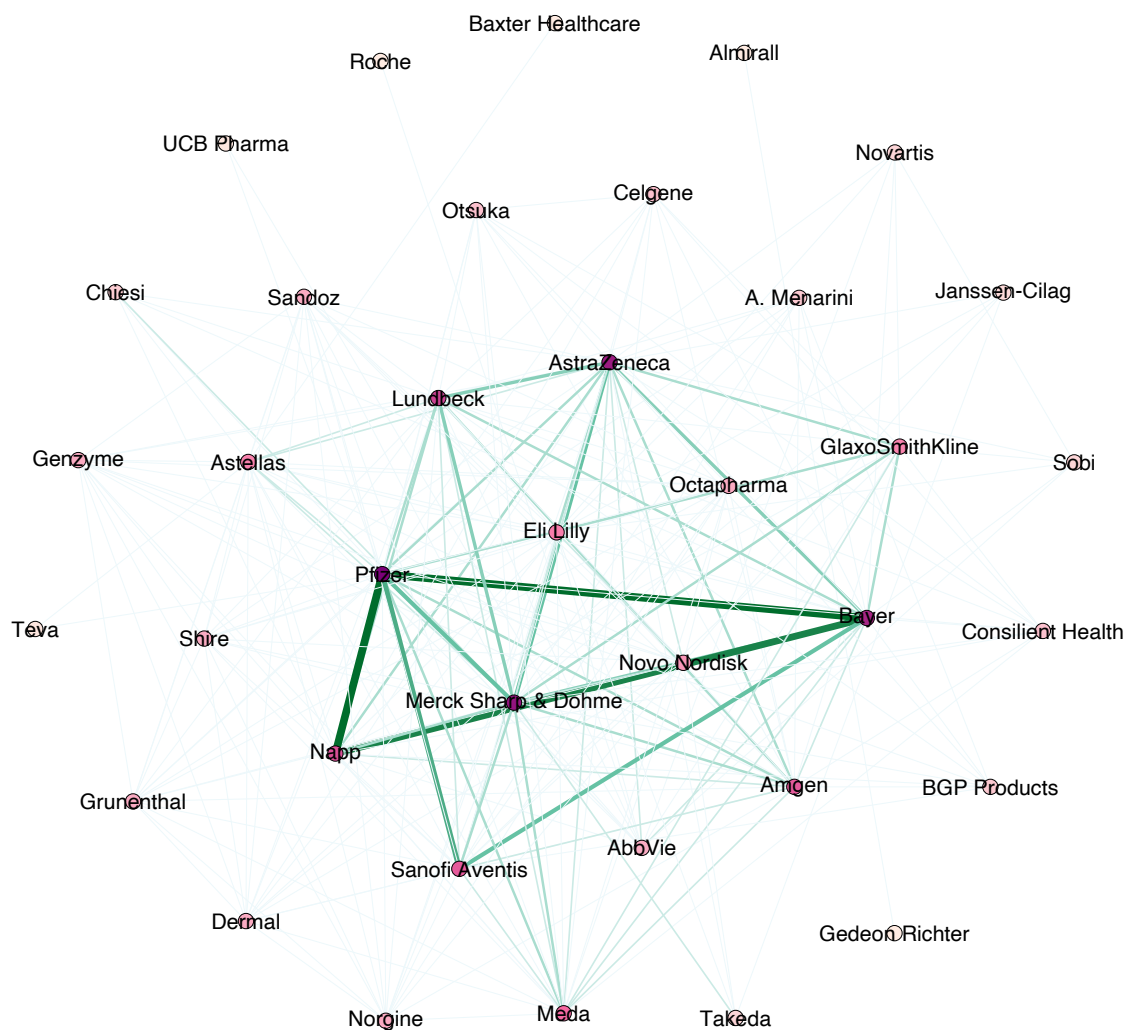

Note. All networks were visualised in Gephi v 0.9.2. Node label size and darkness corresponds to the weighted degree centrality of each company; the size and darkness of the edges (connecting lines) correspond to the number of shared recipients between companies

Supplementary File 6. Top ten companies by degree centrality scores in each country

| England                 |        | Scotland                  |        | Wales                     |        | Northern Ireland          |        |
|-------------------------|--------|---------------------------|--------|---------------------------|--------|---------------------------|--------|
| Company                 | Degree | Company                   | Degree | Company                   | Degree | Company                   | Degree |
| Pfizer (2)              | 3394   | Pfizer (2)                | 319    | Pfizer (2)                | 206    | Pfizer (2)                | 63     |
| Merck Sharp & Dohme (6) | 3064   | Bayer (8)                 | 260    | Eli Lilly (3)             | 196    | Merck Sharp & Dohme (6)   | 57     |
| Bayer (8)               | 3060   | Merck Sharp & Dohme (6)   | 251    | Bayer (8)                 | 176    | AstraZeneca (1)           | 55     |
| AstraZeneca (1)         | 2755   | AstraZeneca (1)           | 245    | AstraZeneca (1)           | 171    | Bayer (8)                 | 52     |
| Eli Lilly (3)           | 2741   | Eli Lilly (3)             | 245    | Bristol-Myers Squibb (23) | 169    | Lundbeck (64)             | 43     |
| Janssen-Cilag (10)      | 2539   | GlaxoSmithKline (4)       | 241    | Novartis (7)              | 168    | Napp Pharmaceuticals (29) | 39     |
| GlaxoSmithKline (4)     | 2531   | Janssen-Cilag (10)        | 227    | Merck Sharp & Dohme (6)   | 161    | Amgen (19)                | 36     |
| Astellas Pharma (21)    | 2410   | Sanofi Aventis (13)       | 214    | Astellas Pharma (21)      | 160    | Sanofi Aventis (13)       | 36     |
| Chiesi (27)             | 2365   | Astellas Pharma (21)      | 196    | Chiesi (27)               | 158    | Meda Pharma (46)          | 32     |
| Sanofi Aventis (13)     | 2156   | Bristol-Myers Squibb (23) | 193    | Sanofi Aventis (13)       | 156    | Eli Lilly (3)             | 27     |

Note. Numbers in brackets represent company size (revenue ranking)



## Supplementary File 7. Descriptive statistics for each recipient type

| England – types of recipient                                    | Value (%)                   | Payments – n (%)    | Median - £ (IQR)           | Recipients – n (%)  | Pharmaceutical companies     |
|-----------------------------------------------------------------|-----------------------------|---------------------|----------------------------|---------------------|------------------------------|
| Public sector secondary and tertiary care providers             | <b>13,349,779.1 (25.56)</b> | <b>6660 (36.87)</b> | 233.17 (141.87 – 500)      | 260 (7.41)          | <b>89</b>                    |
| Patient organisation                                            | 12,227,843.2 (23.41)        | 1141 (6.32)         | <b>4000 (500 – 11,104)</b> | 288 (8.21)          | 65                           |
| Education and research providers                                | 9,055,882.96 (17.34)        | 875 (4.84)          | 1000 (333.34 – 4,798.40)   | 56 (1.60)           | 68                           |
| Professional organisations                                      | 7,545,121.68 (14.44)        | 1776 (9.83)         | 500 (240 – 3,200)          | 354 (10.09)         | 84                           |
| Private companies other than providers of health services       | 3,975,461.63 (7.61)         | 1443 (7.99)         | 300 (196.8 – 598.92)       | 239 (6.81)          | 56                           |
| Public sector primary care providers                            | 2,416,957.98 (4.63)         | 2513 (13.91)        | 434.5 (193.6 – 869)        | <b>1809 (51.55)</b> | 32                           |
| Private sector healthcare providers                             | 1,322,785.04 (2.53)         | 463 (2.56)          | 240 (166 – 588)            | 108 (3.08)          | 44                           |
| Healthcare commissioning, planning and regulatory organisations | 1,235,239.68 (2.36)         | 2166 (11.99)        | 208.17 (160 – 307.2)       | 206 (5.87)          | 47                           |
| Charities and other third-sector organisations                  | 876,822.76 (1.68)           | 366 (2.03)          | 223.52 (157 – 487.2)       | 39 (1.11)           | 40                           |
| Formal bodies representing healthcare professionals or patients | 121,351.93 (0.23)           | 458 (2.54)          | 200 (160 – 259.8)          | 68 (1.94)           | 25                           |
| Alternative providers of health services                        | 93,534.91 (0.18)            | 180 (1.00)          | 200 (160 – 394)            | 62 (1.77)           | 28                           |
| Public administration and providers of public services          | 15,335.25 (0.03)            | 24 (0.13)           | 394.4 (224.45 – 546.67)    | 20 (0.57)           | 10                           |
| <i>All payments</i>                                             | <i>52,445,615.48</i>        | <i>18065</i>        | <i>280 (160 – 827.75)</i>  | <i>3509</i>         | <i>100</i>                   |
| Scotland - types of recipient                                   | Value (%)                   | Payments - n (%)    | Median - £ (IQR)           | Recipients - n (%)  | Pharmaceutical companies (%) |
| Healthcare commissioning, planning and regulatory organisations | <b>878,333.57 (24.13)</b>   | <b>582 (43.30)</b>  | 240 (131.18 - 500)         | 22 (8.30)           | <b>53 (73.61)</b>            |
| Private companies other than providers of health services       | 740,694.09 (20.35)          | 25 (1.86)           | 1,200 (350 - 5,528.88)     | 11 (4.15)           | 13 (18.06)                   |
| Education and research providers                                | 708,149.16 (19.46)          | 141 (10.49)         | 1152 (400 – 2,880)         | 8 (3.02)            | 41 (56.94)                   |
| Patient organisation                                            | 620,384.33 (17.05)          | 52 (3.87)           | 1000 (253.68 - 9,745)      | 14 (5.28)           | 19 (26.39)                   |
| Professional organisations                                      | 466,833.11 (12.83)          | 291 (21.65)         | 450 (285.67 - 980)         | 64 (24.15)          | 52 (72.22)                   |

|                                                                 |                               |                         |                                 |                           |                                     |
|-----------------------------------------------------------------|-------------------------------|-------------------------|---------------------------------|---------------------------|-------------------------------------|
| Public sector primary care providers                            | 112,308.91<br>(3.09)          | 128<br>(9.52)           | 434.5 (202.23 -<br>651,75)      | <b>113<br/>(42.64)</b>    | 13 (18.06)                          |
| Private sector healthcare providers                             | 58,091.76<br>(1.60)           | 69 (5.13)               | 647.54 (206.65-<br>1,500)       | 11 (4.15)                 | 9 (12.50)                           |
| Public sector secondary and tertiary care providers             | 27,392.82<br>(0.75)           | 39 (2.90)               | 300 (189.75 -<br>612)           | 12 (4.53)                 | 11 (15.28)                          |
| Charities and other third-sector organisations                  | 19,710 (0.54)                 | 4 (0.30)                | <b>1700 (377.5 -<br/>6,250)</b> | 2 (0.75)                  | 4 (5.56)                            |
| Alternative providers of health services                        | 4,580 (0.13)                  | 6 (0.45)                | 700 (360 - 1,100)               | 4 (1.51)                  | 4 (5.56)                            |
| Public administration and providers of public services          | 2,700 (0.07)                  | 5 (0.37)                | 540 (200 - 600)                 | 3 (1.13)                  | 5 (6.94)                            |
| Formal bodies representing healthcare professionals or patients | 427.2 (0.01)                  | 2 (0.15)                | 213.6 (211.4 -<br>214.8)        | 1 (0.38)                  | 1 (1.39)                            |
| <i>All payments</i>                                             | <i>3,649,749.43</i>           | <i>1,344</i>            | <i>400 (180 - 864)</i>          | <i>265</i>                | <i>72</i>                           |
| <b>Wales - types of recipient</b>                               | <b>Value (%)</b>              | <b>Payments - n (%)</b> | <b>Median - £ (IQR)</b>         | <b>Recipients - n (%)</b> | <b>Pharmaceutical companies (%)</b> |
| Healthcare commissioning, planning and regulatory organisations | <b>920,980.22<br/>(46.38)</b> | <b>557<br/>(56.61)</b>  | 225 (114.24 -<br>486.39)        | 10 (4.72)                 | <b>50 (78.13)</b>                   |
| Private companies other than providers of health services       | 179,495.4<br>(9.04)           | 56 (5.69)               | <b>1475 (216 -<br/>6,600)</b>   | 10 (4.72)                 | 8 (12.50)                           |
| Education and research providers                                | 179,256.38<br>(9.03)          | 37 (3.76)               | 336 (175.2 -<br>1000)           | 5 (2.36)                  | 16 (25.00)                          |
| Public sector primary care providers                            | 173,268.30<br>(8.73)          | 141<br>(14.33)          | 800 (434.5 -<br>1,152)          | <b>118<br/>(55.66)</b>    | 15 (23.44)                          |
| Private sector healthcare providers                             | 153,983.36<br>(7.76)          | 18 (1.83)               | 440 (360.94 -<br>1,732)         | 6 (2.83)                  | 9 (14.06)                           |
| Public administration and providers of public services          | 108,000<br>(5.44)             | 1 (0.10)                | -                               | 1 (0.47)                  | 1 (1.56)                            |
| Patient organisation                                            | 99,784.32<br>(5.03)           | 22 (2.24)               | 747.93 (500 -<br>2,000)         | 10 (4.72)                 | 11 (17.19)                          |
| Public sector secondary and tertiary care providers             | 96,862.66<br>(4.88)           | 20 (2.03)               | 253.66 (200 -<br>954)           | 3 (1.42)                  | 13 (20.31)                          |
| Professional organisations                                      | 64,181.82<br>(3.23)           | 88 (8.94)               | 400 (280 - 800)                 | 38 (17.92)                | 31 (48.44)                          |
| Charities and other third-sector organisations                  | 5,036.8 (0.25)                | 17 (1.73)               | 120 (120 - 180)                 | 4 (1.89)                  | 7 (10.94)                           |
| Formal bodies representing healthcare professionals or patients | 4,679.37<br>(0.24)            | 27 (2.74)               | 120 (96 - 142)                  | 7 (3.30)                  | 11 (17.19)                          |
| <i>All payments</i>                                             | <i>1,987,702.62</i>           | <i>984</i>              | <i>300 (144 - 800)</i>          | <i>212</i>                | <i>64</i>                           |

| <b>Northern Ireland - types of recipient</b>                    | <b>Value (%)</b>          | <b>Payments - n (%)</b> | <b>Median - £ (IQR)</b>             | <b>Recipients - n (%)</b> | <b>Pharmaceutical companies (%)</b> |
|-----------------------------------------------------------------|---------------------------|-------------------------|-------------------------------------|---------------------------|-------------------------------------|
| Public sector primary care providers                            | <b>184,903.09 (35.72)</b> | <b>127 (40.97)</b>      | 600 (434.5 - 1,600)                 | <b>94 (60.65)</b>         | 6 (14.29)                           |
| Public sector secondary and tertiary care providers             | 111,743.45 (21.59)        | 83 (26.77)              | 288 (163.4 - 490.13)                | 5 (3.23)                  | <b>27 (64.29)</b>                   |
| Professional organisations                                      | 81,489.7 (15.74)          | 34 (10.97)              | 600 (320 - 1,784)                   | 21 (13.55)                | 21 (50.00)                          |
| Patient organisation                                            | 43,205.6 (8.35)           | 15 (4.84)               | 650 (600 - 1,450)                   | 7 (4.52)                  | 14 (33.33)                          |
| Education and research providers                                | 32,258 (6.23)             | 10 (3.23)               | 1100 (873.75 - 3525)                | 1 (0.65)                  | 7 (16.67)                           |
| Private companies other than providers of health services       | 26,242.77 (5.07)          | 6 (1.94)                | <b>4179.38 (1,152.19 - 7,687.5)</b> | 4 (2.58)                  | 3 (7.14)                            |
| Healthcare commissioning, planning and regulatory organisations | 22,447.6 (4.34)           | 7 (2.26)                | 1500 (470.8 - 4,087)                | 4 (2.58)                  | 6 (14.29)                           |
| Private sector healthcare providers                             | 11,476.85 (2.22)          | 23 (7.42)               | 38.49 (28.9 - 485)                  | 16 (10.32)                | 6 (14.29)                           |
| Formal bodies representing healthcare professionals or patients | 2,133.34 (0.41)           | 2 (0.65)                | 1066.67 (933.33 - 1200.00)          | 1 (0.65)                  | 1 (2.38)                            |
| Alternative providers of health services                        | 1,700 (0.33)              | 3 (0.97)                | 600 (550 - 600)                     | 2 (1.29)                  | 2 (4.76)                            |
| <i>All payments</i>                                             | <i>517,600.40</i>         | <i>310</i>              | <i>475.2 (217.25 - 1,357.47)</i>    | <i>155</i>                | <i>42</i>                           |

Supplementary File 8. Top 10 recipients in each country

| Country  | Recipient                          | Type of recipient                                               | Value - £    | Payments - n | Companies - n |
|----------|------------------------------------|-----------------------------------------------------------------|--------------|--------------|---------------|
| England  | King's College London              | Education and research providers                                | 2,572,086.51 | 45           | 18            |
|          | Bladder and Bowel Foundation       | Patient organisation                                            | 1,459,371.52 | 11           | 1             |
|          | London School Hyg and Tropical Med | Education and research providers                                | 935,025.98   | 16           | 6             |
|          | PeerVoice                          | Private companies other than providers of health services       | 930,028.30   | 11           | 3             |
|          | University College London          | Education and research providers                                | 907,256.40   | 96           | 36            |
|          | Diabetes UK - England              | Patient organisation                                            | 888,845.00   | 41           | 7             |
|          | Healthcare At Home                 | Private sector healthcare providers                             | 872,740.81   | 18           | 2             |
|          | Cancer Research UK                 | Patient organisation                                            | 804,543.76   | 19           | 9             |
|          | Central Manchester Univ Hosps FT   | Public sector secondary and tertiary care providers             | 739,595.97   | 108          | 37            |
|          | British Society for Rheumatology   | Professional organisations                                      | 543,012.33   | 31           | 14            |
| Scotland | Quintiles - Scotland               | Private companies other than providers of health services       | 682,601.65   | 5            | 1             |
|          | Myeloma UK                         | Patient organisation                                            | 521,574.36   | 12           | 7             |
|          | NHS Greater Glasgow and Clyde      | Healthcare commissioning, planning and regulatory organisations | 483,354.99   | 153          | 34            |
|          | University of Glasgow              | Education and research providers                                | 442,707.63   | 70           | 26            |
|          | University of Dundee               | Education and research providers                                | 160,632.40   | 20           | 11            |
|          | NHS Lothian                        | Healthcare commissioning, planning and regulatory organisations | 144,175.05   | 73           | 25            |
|          | University of Edinburgh            | Education and research providers                                | 73,014.39    | 37           | 21            |
|          | NHS Tayside                        | Healthcare commissioning, planning and regulatory organisations | 67,924.08    | 74           | 24            |
|          | NHS Ayrshire and Arran             | Healthcare commissioning, planning and regulatory organisations | 63,276.93    | 48           | 25            |
|          | Digestive Disorders Federation     | Professional organisations                                      | 60,796.00    | 2            | 2             |
| Wales    | Cardiff and Vale University HB     | Healthcare commissioning, planning and regulatory organisations | 344,131.95   | 89           | 28            |

|                  |                                                                               |                                                                 |            |     |    |
|------------------|-------------------------------------------------------------------------------|-----------------------------------------------------------------|------------|-----|----|
|                  | Abertawe Bro Morgannwg Univ HB                                                | Healthcare commissioning, planning and regulatory organisations | 242,418.82 | 124 | 32 |
|                  | LloydsPharmacy                                                                | Private sector healthcare providers                             | 146,376.00 | 4   | 1  |
|                  | University of Cardiff                                                         | Education and research providers                                | 120,822.78 | 27  | 13 |
|                  | Bluebay Medical Systems                                                       | Private companies other than providers of health services       | 116,900.00 | 26  | 1  |
|                  | Hywel Dda University HB                                                       | Healthcare commissioning, planning and regulatory organisations | 115,600.62 | 77  | 27 |
|                  | National Assembly for Wales                                                   | Public administration and providers of public services          | 108,000.00 | 1   | 1  |
|                  | Betsi Cadwaladr University HB                                                 | Healthcare commissioning, planning and regulatory organisations | 101,352.58 | 76  | 21 |
|                  | Cwm Taf University Health Board                                               | Healthcare commissioning, planning and regulatory organisations | 84,624.15  | 119 | 25 |
|                  | Velindre NHS Trust                                                            | Public sector secondary and tertiary care providers             | 80,629.32  | 18  | 13 |
| Northern Ireland | Belfast Health and SC Trust                                                   | Public sector secondary and tertiary care providers             | 60,615.65  | 30  | 17 |
|                  | Federation Of Family Practices                                                | Public sector primary care providers                            | 40,235.20  | 3   | 3  |
|                  | UK and Ireland Society of Cataract and Refractive Surgeons - Northern Ireland | Professional organisations                                      | 35,000.00  | 1   | 1  |
|                  | Queen's University Belfast                                                    | Education and research providers                                | 32,258.00  | 10  | 7  |
|                  | Northern Health and SC Trust                                                  | Public sector secondary and tertiary care providers             | 23,703.46  | 14  | 8  |
|                  | Medical Communications                                                        | Private companies other than providers of health services       | 23,250.00  | 3   | 1  |
|                  | Adult ADHD - Northern Ireland                                                 | Patient organisation                                            | 20,000.00  | 1   | 1  |
|                  | Ulster Chemists' Association                                                  | Professional organisations                                      | 16,584.00  | 4   | 3  |
|                  | Western Health and SC Trust                                                   | Public sector secondary and tertiary care providers             | 15,068.55  | 12  | 10 |
|                  | Cancer Focus Northern Ireland                                                 | Patient organisation                                            | 12,255.60  | 2   | 2  |

Supplementary File 9. Post-hoc Bonferroni pairwise comparisons between countries of payments per recipient type

| Recipient type                                      | Group 1 – Group 2*        | Test Statistic | Std. Error | Std. Test Statistic | Sig.  | Adj. Sig <sup>†,‡</sup> | Median (IQR) – group 1 - £ | Median (IQR) – group 2 - £  |
|-----------------------------------------------------|---------------------------|----------------|------------|---------------------|-------|-------------------------|----------------------------|-----------------------------|
| Alternative providers of health services            | England-Scotland          | -59.003        | 22.681     | -2.601              | 0.009 | <b>0.028</b>            | 200 (160 – 394)            | 700 (360 – 1,100)           |
|                                                     | England-Northern Ireland  | -65.919        | 31.816     | -2.072              | 0.038 | 0.115                   | 200 (160 – 394)            | 600 (550 - 600)             |
|                                                     | Scotland-Northern Ireland | 6.917          | 38.645     | 0.179               | 0.858 | 1                       | 700 (360 – 1,100)          | 600 (550 - 600)             |
| Charities and other third-sector organisations      | England-Scotland          | -118.214       | 56.132     | -2.106              | 0.035 | 0.106                   | 223.52 (157 – 487.2)       | <b>1700 (377.5 - 6,250)</b> |
|                                                     | Wales-England             | 79.844         | 27.702     | 2.882               | 0.004 | <b>0.012</b>            | 120 (120 - 180)            | 223.52 (157 – 487.2)        |
|                                                     | Wales-Scotland            | 198.059        | 62.049     | 3.192               | 0.001 | <b>0.004</b>            | 120 (120 - 180)            | <b>1700 (377.5 - 6,250)</b> |
| Education and research providers                    | England-Scotland          | -5.623         | 27.857     | -0.202              | 0.84  | 1                       | 1000 (333.34 – 4,798.40)   | 1152 (400 – 2,880)          |
|                                                     | England-Northern Ireland  | -92.61         | 97.628     | -0.949              | 0.343 | 1                       | 1000 (333.34 – 4,798.40)   | 1100 (873.75 - 3525)        |
|                                                     | Scotland-Northern Ireland | 86.987         | 100.458    | 0.866               | 0.387 | 1                       | 1152 (400 – 2,880)         | 1100 (873.75 - 3525)        |
|                                                     | Wales-England             | 204.193        | 51.523     | 3.963               | <.001 | <b>0</b>                | 336 (175.2 - 1000)         | 1000 (333.34 – 4,798.40)    |
|                                                     | Wales-Scotland            | 209.816        | 56.703     | 3.7                 | <.001 | <b>0.001</b>            | 336 (175.2 - 1000)         | 1152 (400 – 2,880)          |
|                                                     | Wales-Northern Ireland    | 296.803        | 109.409    | 2.713               | 0.007 | <b>0.04</b>             | 336 (175.2 - 1000)         | 1100 (873.75 - 3525)        |
| Formal bodies representing healthcare professionals | England-Scotland          | -46.978        | 99.854     | -0.47               | 0.638 | 1                       | 200 (160 – 259.8)          | 213.6 (211.4 - 214.8)       |
|                                                     | England-Northern Ireland  | -223.228       | 99.854     | -2.236              | 0.025 | 0.152                   | 200 (160 – 259.8)          | 1066.67 (933.33 - 1200.00)  |
|                                                     | Scotland-Northern Ireland | 176.25         | 140.907    | 1.251               | 0.211 | 1                       | 213.6 (211.4 - 214.8)      | 1066.67 (933.33 - 1200.00)  |
|                                                     | Wales-England             | 138.133        | 27.905     | 4.95                | <.001 | <b>0</b>                | 120 (96 - 142)             | 200 (160 – 259.8)           |
|                                                     | Wales-Scotland            | 185.111        | 103.261    | 1.793               | 0.073 | 0.438                   | 120 (96 - 142)             | 213.6 (211.4 - 214.8)       |

|                                                                 |                           |          |         |        |       |              |                           |                                     |
|-----------------------------------------------------------------|---------------------------|----------|---------|--------|-------|--------------|---------------------------|-------------------------------------|
|                                                                 | Wales-Northern Ireland    | 361.361  | 103.261 | 3.5    | <.001 | <b>0.003</b> | 120 (96 - 142)            | 1066.67 (933.33 - 1200.00)          |
| Healthcare commissioning, planning and regulatory organisations | England-Scotland          | -122.159 | 44.623  | -2.738 | 0.006 | <b>0.037</b> | 208.17 (160 - 307.2)      | 240 (131.18 - 500)                  |
|                                                                 | England-Northern Ireland  | -786.684 | 361.817 | -2.174 | 0.03  | 0.178        | 208.17 (160 - 307.2)      | 1500 (470.8 - 4,087)                |
|                                                                 | Scotland-Northern Ireland | 664.525  | 363.4   | 1.829  | 0.067 | 0.405        | 240 (131.18 - 500)        | 1500 (470.8 - 4,087)                |
|                                                                 | Wales-Scotland            | 94.65    | 56.651  | 1.671  | 0.095 | 0.569        | 225 (114.24 - 486.39)     | 240 (131.18 - 500)                  |
|                                                                 | Wales-Northern Ireland    | 759.175  | 363.497 | 2.089  | 0.037 | 0.22         | 225 (114.24 - 486.39)     | 1500 (470.8 - 4,087)                |
|                                                                 | England-Wales             | -27.51   | 45.405  | -0.606 | 0.545 | 1            | 208.17 (160 - 307.2)      | 225 (114.24 - 486.39)               |
| Patient organisation                                            | Wales-England             | 144.727  | 77.321  | 1.872  | 0.061 | 0.367        | 747.93 (500 - 2,000)      | <b>4000 (500 - 11,104)</b>          |
|                                                                 | Wales-Scotland            | 29.422   | 91.028  | 0.323  | 0.747 | 1            | 747.93 (500 - 2,000)      | 1000 (253.68 - 9,745)               |
|                                                                 | Northern Ireland-Wales    | -8.633   | 118.686 | -0.073 | 0.942 | 1            | 650 (600 - 1,450)         | 747.93 (500 - 2,000)                |
|                                                                 | Northern Ireland-Scotland | -38.055  | 103.121 | -0.369 | 0.712 | 1            | 650 (600 - 1,450)         | 1000 (253.68 - 9,745)               |
|                                                                 | Northern Ireland-England  | 153.361  | 91.248  | 1.681  | 0.093 | <b>0.557</b> | 650 (600 - 1,450)         | <b>4000 (500 - 11,104)</b>          |
|                                                                 | Scotland-England          | 115.306  | 50.259  | 2.294  | 0.022 | 0.131        | 1000 (253.68 - 9,745)     | <b>4000 (500 - 11,104)</b>          |
| Private companies other than providers of health services       | England-Scotland          | -317.041 | 89.112  | -3.558 | <.001 | <b>0.002</b> | 300 (196.8 - 598.92)      | 1,200 (350 - 5,528.88)              |
|                                                                 | England-Northern Ireland  | -527.308 | 180.717 | -2.918 | 0.004 | <b>0.021</b> | 300 (196.8 - 598.92)      | <b>4179.38 (1,152.19 - 7,687.5)</b> |
|                                                                 | Scotland-Northern Ireland | 210.267  | 200.821 | 1.047  | 0.295 | 1            | 1,200 (350 - 5,528.88)    | <b>4179.38 (1,152.19 - 7,687.5)</b> |
|                                                                 | Wales-Scotland            | 115.061  | 106.256 | 1.083  | 0.279 | 1            | <b>1475 (216 - 6,600)</b> | 1,200 (350 - 5,528.88)              |
|                                                                 | Wales-Northern Ireland    | 325.327  | 189.758 | 1.714  | 0.086 | 0.519        | <b>1475 (216 - 6,600)</b> | <b>4179.38 (1,152.19 - 7,687.5)</b> |

|                                      |                           |          |         |        |       |              |                         |                           |
|--------------------------------------|---------------------------|----------|---------|--------|-------|--------------|-------------------------|---------------------------|
|                                      | England-Wales             | -201.98  | 60.166  | -3.357 | <.001 | <b>0.005</b> | 300 (196.8 – 598.92)    | <b>1475 (216 – 6,600)</b> |
| Private sector healthcare providers  | England-Scotland          | -64.982  | 21.355  | -3.043 | 0.002 | <b>0.014</b> | 240 (166 – 588)         | 647.54 (206.65 – 1,500)   |
|                                      | England-Wales             | -88.107  | 39.755  | -2.216 | 0.027 | 0.16         | 240 (166 – 588)         | 440 (360.94 – 1,732)      |
|                                      | Northern Ireland-Wales    | -206.778 | 52.076  | -3.971 | <.001 | <b>0</b>     | 38.49 (28.9 – 485)      | 440 (360.94 – 1,732)      |
|                                      | Northern Ireland-Scotland | -183.652 | 39.843  | -4.609 | <.001 | <b>0</b>     | 38.49 (28.9 – 485)      | 647.54 (206.65 – 1,500)   |
|                                      | Northern Ireland-England  | 118.671  | 35.352  | 3.357  | <.001 | <b>0.005</b> | 38.49 (28.9 – 485)      | 240 (166 – 588)           |
|                                      | Scotland-wales            | -23.126  | 43.797  | -0.528 | 0.597 | 1            | 647.54 (206.65 – 1,500) | 440 (360.94 – 1,732)      |
| Professional organisations           | England-Northern Ireland  | -35.169  | 109.4   | -0.321 | 0.748 | 1            | 500 (240 – 3,200)       | 600 (320 – 1,784)         |
|                                      | Scotland-Northern Ireland | 157.615  | 114.524 | 1.376  | 0.169 | 1            | 450 (285.67 – 980)      | 600 (320 – 1,784)         |
|                                      | Wales-England             | 182.447  | 69.008  | 2.644  | 0.008 | <b>0.049</b> | 400 (280 – 800)         | 500 (240 – 3,200)         |
|                                      | Wales-Scotland            | 60.001   | 76.873  | 0.781  | 0.435 | 1            | 400 (280 – 800)         | 450 (285.67 – 980)        |
|                                      | Wales-Northern Ireland    | 217.616  | 127.597 | 1.705  | 0.088 | 0.529        | 400 (280 – 800)         | 600 (320 – 1,784)         |
| Public sector primary care providers | Scotland-England          | 122.446  | 39.962  | 3.064  | 0.002 | <b>0.013</b> | 450 (285.67 – 980)      | 500 (240 – 3,200)         |
|                                      | England-Northern Ireland  | -355.779 | 76.292  | -4.663 | <.001 | <b>0</b>     | 434.5 (193.6 – 869)     | 600 (434.5 – 1,600)       |
|                                      | Scotland-Northern Ireland | 407.76   | 105.06  | 3.881  | <.001 | <b>0.001</b> | 434.5 (202.23 – 651,75) | 600 (434.5 – 1,600)       |
|                                      | England-Wales             | -459.79  | 72.597  | -6.333 | <.001 | <b>0</b>     | 434.5 (193.6 – 869)     | 800 (434.5 – 1,152)       |
|                                      | Northern Ireland-Wales    | -104.011 | 102.62  | -1.014 | 0.311 | 1            | 600 (434.5 – 1,600)     | 800 (434.5 – 1,152)       |
|                                      | Scotland-England          | 51.98    | 76.008  | 0.684  | 0.494 | 1            | 434.5 (202.23 – 651,75) | 434.5 (193.6 – 869)       |
|                                      | Scotland-wales            | -511.771 | 102.409 | -4.997 | <.001 | <b>0</b>     | 434.5 (202.23 – 651,75) | 800 (434.5 – 1,152)       |

\*Each row tests the null hypothesis that the Sample 1 and Sample 2 distributions are the same.

†Asymptotic significances (2-sided tests) are displayed. The significance level is .050.

‡Significance values have been adjusted by the Bonferroni correction for multiple tests



Supplementary File 10. Post-hoc Bonferroni pairwise comparisons of payment types between countries

| Payment Type*                   | Group 1 – Group 2** | Test Statistic | Std. Error | Std. Test Statistic | Sig.  | Adj. Sig†,‡ | Median (IQR) – group 1 - £ | Median (IQR) – group 2 - £ |
|---------------------------------|---------------------|----------------|------------|---------------------|-------|-------------|----------------------------|----------------------------|
| Contribution to costs of Events | Wales-England       | 498.254        | 159.743    | 3.119               | 0.002 | 0.011       | 223.36 (120 - 400)         | 240 (155.95 - 400)         |
|                                 | Wales-Scotland      | 1449.82        | 208.45     | 6.955               | <.001 | 0           | 223.36 (120 - 400)         | 300 (160 - 600)            |
|                                 | Wales-Northern      | 2690.485       | 402.839    | 6.679               | <.001 | 0           | 223.36 (120 - 400)         | 477.6 (200 - 1,147.6)      |
|                                 | England-Scotland    | -951.566       | 143.605    | -6.626              | <.001 | 0           | 240 (155.95 - 400)         | 300 (160 - 600)            |
|                                 | England-Northern    | -2192.23       | 373.43     | -5.871              | <.001 | 0           | 240 (155.95 - 400)         | 477.6 (200 - 1,147.6)      |
|                                 | Scotland-Northern   | 1240.664       | 396.716    | 3.127               | 0.002 | 0.011       | 300 (160 - 600)            | 477.6 (200 - 1,147.6)      |
| Donations and Grants            | Wales-England       | 25.151         | 94.77      | 0.265               | 0.791 | 1           | 800 (434.5 - 2,200)        | 959.98 (256 - 4,800)       |
|                                 | Northern-Scotland   | -140.935       | 137.745    | -1.023              | 0.306 | 1           | 434.5 (217.5 - 1,867.5)    | 651.75 (217.25 - 2,578)    |
|                                 | Northern-Wales      | -451.347       | 142.863    | -3.159              | 0.002 | 0.009       | 434.5 (217.5 - 1,867.5)    | 800 (434.5 - 2,200)        |
|                                 | Northern-England    | 476.498        | 111.315    | 4.281               | <.001 | 0           | 434.5 (217.5 - 1,867.5)    | 959.98 (256 - 4,800)       |
|                                 | Scotland-Wales      | -310.412       | 124.755    | -2.488              | 0.013 | 0.077       | 651.75 (217.25 - 2,578)    | 800 (434.5 - 2,200)        |
|                                 | Scotland-England    | 335.563        | 86.862     | 3.863               | <.001 | 0.001       | 651.75 (217.25 - 2,578)    | 959.98 (256 - 4,800)       |

\*Kruskal-Wallis results: Contributions to cost of events  $\chi^2(3) = 89.680, p = .000$ ; Donations and grants  $\chi^2(3) = 31.698, p = <.000$

\*\*Each row tests the null hypothesis that the Sample 1 and Sample 2 distributions are the same.

†Asymptotic significances (2-sided tests) are displayed. The significance level is .050.

‡Significance values have been adjusted by the Bonferroni correction for multiple tests.

STROBE Statement—Checklist of items that should be included in reports of *cross-sectional studies*

|                              | Item No | Recommendation                                                                                                                                                                                    | Page No                             |
|------------------------------|---------|---------------------------------------------------------------------------------------------------------------------------------------------------------------------------------------------------|-------------------------------------|
| <b>Title and abstract</b>    | 1       | (a) Indicate the study's design with a commonly used term in the title or the abstract                                                                                                            | 2                                   |
|                              |         | (b) Provide in the abstract an informative and balanced summary of what was done and what was found                                                                                               | 2                                   |
| <b>Introduction</b>          |         |                                                                                                                                                                                                   |                                     |
| Background/rationale         | 2       | Explain the scientific background and rationale for the investigation being reported                                                                                                              | 3-4                                 |
| Objectives                   | 3       | State specific objectives, including any prespecified hypotheses                                                                                                                                  | 4                                   |
| <b>Methods</b>               |         |                                                                                                                                                                                                   |                                     |
| Study design                 | 4       | Present key elements of study design early in the paper                                                                                                                                           | 5                                   |
| Setting                      | 5       | Describe the setting, locations, and relevant dates, including periods of recruitment, exposure, follow-up, and data collection                                                                   | 5                                   |
| Participants                 | 6       | (a) Give the eligibility criteria, and the sources and methods of selection of participants                                                                                                       | 5                                   |
| Variables                    | 7       | Clearly define all outcomes, exposures, predictors, potential confounders, and effect modifiers. Give diagnostic criteria, if applicable                                                          | 5-6                                 |
| Data sources/<br>measurement | 8*      | For each variable of interest, give sources of data and details of methods of assessment (measurement). Describe comparability of assessment methods if there is more than one group              | 5-6                                 |
| Bias                         | 9       | Describe any efforts to address potential sources of bias                                                                                                                                         | n/a                                 |
| Study size                   | 10      | Explain how the study size was arrived at                                                                                                                                                         | N/a                                 |
| Quantitative variables       | 11      | Explain how quantitative variables were handled in the analyses. If applicable, describe which groupings were chosen and why                                                                      | 5                                   |
| Statistical methods          | 12      | (a) Describe all statistical methods, including those used to control for confounding                                                                                                             | 5                                   |
|                              |         | (b) Describe any methods used to examine subgroups and interactions                                                                                                                               | n/a                                 |
|                              |         | (c) Explain how missing data were addressed                                                                                                                                                       | n/a                                 |
|                              |         | (d) If applicable, describe analytical methods taking account of sampling strategy                                                                                                                | n/a                                 |
|                              |         | (e) Describe any sensitivity analyses                                                                                                                                                             | n/a                                 |
| <b>Results</b>               |         |                                                                                                                                                                                                   |                                     |
| Participants                 | 13*     | (a) Report numbers of individuals at each stage of study—eg numbers potentially eligible, examined for eligibility, confirmed eligible, included in the study, completing follow-up, and analysed | Supplementary File 4 (flow diagram) |
|                              |         | (b) Give reasons for non-participation at each stage                                                                                                                                              | n/a                                 |
|                              |         | (c) Consider use of a flow diagram                                                                                                                                                                | Supplementary File 4                |

|                          |     |                                                                                                                                                                                                              |       |
|--------------------------|-----|--------------------------------------------------------------------------------------------------------------------------------------------------------------------------------------------------------------|-------|
| Descriptive data         | 14* | (a) Give characteristics of study participants (eg demographic, clinical, social) and information on exposures and potential confounders                                                                     | n/a   |
|                          |     | (b) Indicate number of participants with missing data for each variable of interest                                                                                                                          | n/a   |
| Outcome data             | 15* | Report numbers of outcome events or summary measures                                                                                                                                                         | 6     |
| Main results             | 16  | (a) Give unadjusted estimates and, if applicable, confounder-adjusted estimates and their precision (eg, 95% confidence interval). Make clear which confounders were adjusted for and why they were included | n/a   |
|                          |     | (b) Report category boundaries when continuous variables were categorized                                                                                                                                    | n/a   |
|                          |     | (c) If relevant, consider translating estimates of relative risk into absolute risk for a meaningful time period                                                                                             | n/a   |
| Other analyses           | 17  | Report other analyses done—eg analyses of subgroups and interactions, and sensitivity analyses                                                                                                               | n/a   |
| <b>Discussion</b>        |     |                                                                                                                                                                                                              |       |
| Key results              | 18  | Summarise key results with reference to study objectives                                                                                                                                                     | 11-13 |
| Limitations              | 19  | Discuss limitations of the study, taking into account sources of potential bias or imprecision. Discuss both direction and magnitude of any potential bias                                                   | 13    |
| Interpretation           | 20  | Give a cautious overall interpretation of results considering objectives, limitations, multiplicity of analyses, results from similar studies, and other relevant evidence                                   | 11-14 |
| Generalisability         | 21  | Discuss the generalisability (external validity) of the study results                                                                                                                                        | 11-14 |
| <b>Other information</b> |     |                                                                                                                                                                                                              |       |
| Funding                  | 22  | Give the source of funding and the role of the funders for the present study and, if applicable, for the original study on which the present article is based                                                | 1     |

\*Give information separately for exposed and unexposed groups.

**Note:** An Explanation and Elaboration article discusses each checklist item and gives methodological background and published examples of transparent reporting. The STROBE checklist is best used in conjunction with this article (freely available on the Web sites of PLoS Medicine at <http://www.plosmedicine.org/>, Annals of Internal Medicine at <http://www.annals.org/>, and Epidemiology at <http://www.epidem.com/>). Information on the STROBE Initiative is available at [www.strobe-statement.org](http://www.strobe-statement.org).
