# Supplementary material for: Comparing pharmaceutical company payments in the four UK countries: a cross-sectional and social network analysis
Source: PubMed Central journal article supplement (PMC10069501; doi:10.1136/bmjopen-2022-061591), 2023-03-28
Supplement: bmjopen-2022-061591supp001.pdf [file bmjopen-2022-061591supp001.pdf]

## Supplementary file contents:

| <b>Supplementary File</b>                                                                                                   | <b>Page</b> |
|-----------------------------------------------------------------------------------------------------------------------------|-------------|
| Supplementary File 1. Payment types included in Disclosure UK and patient organisation codes applied to Disclosure UK codes | 2           |
| Supplementary File 2. Data integration flowchart                                                                            | 3           |
| Supplementary File 3. Recipient category descriptions and examples                                                          | 4-5         |
| Supplementary File 4. Top 10% of donors in each country                                                                     | 6           |
| Supplementary File 5. Visualised networks for England (a), Scotland (b), Wales (c), Northern Ireland (d)                    | 7-10        |
| Supplementary File 6. Top ten companies by degree centrality scores in each country                                         | 11          |
| Supplementary File 7. Descriptive statistics for each recipient category                                                    | 12-14       |
| Supplementary File 8. Top 10 recipients in each country                                                                     | 15-16       |
| Supplementary File 9. Post-hoc Bonferroni pairwise comparisons between countries of payments per category                   | 17-19       |
| Supplementary File 10. Post-hoc Bonferroni pairwise comparisons between countries of payment types                          | 20          |

## Supplementary File 1. Payment types included in Disclosure UK and patient organisation codes applied to Disclosure UK codes

| <b>Payment type</b>             | <b>Description of payment type</b>                                                                                                                                                                                                                                                                                                                                                                                                             | <b>Patient organisation payments subsumed within the payment type</b>                                                                                                                                  |
|---------------------------------|------------------------------------------------------------------------------------------------------------------------------------------------------------------------------------------------------------------------------------------------------------------------------------------------------------------------------------------------------------------------------------------------------------------------------------------------|--------------------------------------------------------------------------------------------------------------------------------------------------------------------------------------------------------|
| Contribution to costs of Events | Contribution to costs related to Events, through HCOs or Third Parties, including support to HCPs to attend Events, such as: <ul style="list-style-type: none"> <li>• Registration fees;</li> <li>• Sponsorship agreements with HCOs or with Third Parties appointed by an HCO to manage an Event; and</li> <li>• Travel and accommodation (EFPIA Code of Practice 2019, p. 30)</li> </ul>                                                     | contributions to costs of events organised by recipients or third parties; travel, accommodation and registration fees                                                                                 |
| Donations and Grants to HCOs    | Donations and Grants to HCOs that support healthcare, including donations and grants (either cash or benefits in kind) to institutions, organisations or associations that are comprised of HCPs and/or that provide healthcare (EFPIA Code of Practice 2019, p. 30)                                                                                                                                                                           | donations; grants; corporate member, supporter, sponsor or partner; purchases and subscriptions from patient organisations; more than one distinct payment form; form of funding unclear; sponsorships |
| Fee for service and consultancy | Payments resulting from or related to contracts between Member Companies and HCOs under which such HCOs provide any type of services to a Member Company or any other type of funding not covered in the previous categories. Fees, on the one hand, and on the other hand payments relating to expenses agreed in the written agreement covering the activity will be disclosed as two separate amounts. (EFPIA Code of Practice 2019, p. 30) | fees for service and consultancy (including travel and accommodation); support, help and contributions                                                                                                 |
| Joint working                   | The Department of Health defines joint working between the NHS and the pharmaceutical industry as situations where, for the benefit of patients, one or more pharmaceutical companies and the NHS pool skills, experience and/or resources for the joint development and implementation of patient centred projects and share a commitment to successful delivery. (ABPI Code of Practice 2015, Clause 20, p. 30)                              | n/a                                                                                                                                                                                                    |

## Supplementary File 2. Data integration flowchart

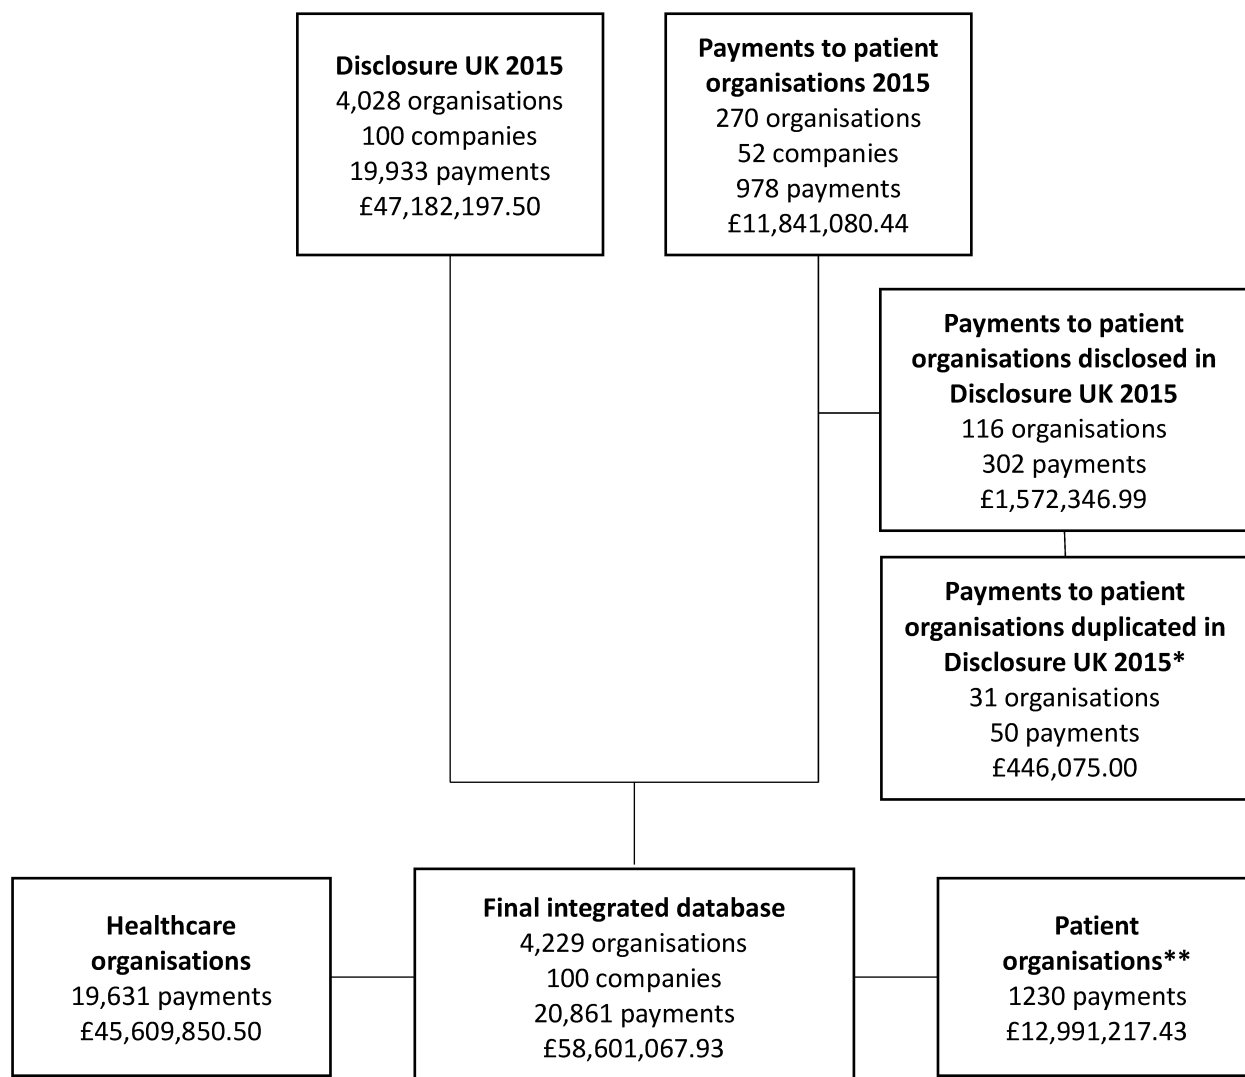

\*This is the number and value of payments excluded to ensure no payment was counted twice

\*\*During the cleaning process, a number of considerations took place to determine the final number and value of payments to patient organisations. Some duplicate payments were identified that were reported as multiple payments in one dataset and one payment in the other dataset (influencing the final number of payments). Approaches to VAT when reporting values also differed between the two datasets (influencing the final value of payments).

## Supplementary File 3. Recipient category descriptions and examples

| Recipient category                                                                                                                             | Category description                                                                                                                    | Examples (country-specific examples where applicable)                                                                                                                                                                                                                                                                                                                                                                                                                                                                                                                                                                                                                                                                   |
|------------------------------------------------------------------------------------------------------------------------------------------------|-----------------------------------------------------------------------------------------------------------------------------------------|-------------------------------------------------------------------------------------------------------------------------------------------------------------------------------------------------------------------------------------------------------------------------------------------------------------------------------------------------------------------------------------------------------------------------------------------------------------------------------------------------------------------------------------------------------------------------------------------------------------------------------------------------------------------------------------------------------------------------|
| Alternative providers of health services                                                                                                       | Charities, not-for-profit companies, social enterprises and community interest companies providing health services                      | <ul style="list-style-type: none"> <li>- social enterprise delivering primary or secondary care health services</li> <li>- nursing or care home run by a community interest company (CIC)</li> <li>- hospital, hospice, or nursing home with a charitable status</li> </ul>                                                                                                                                                                                                                                                                                                                                                                                                                                             |
| Education and research providers                                                                                                               | Universities, charities, and noncommercial institutes undertaking research                                                              | <ul style="list-style-type: none"> <li>- university</li> <li>- research institute at a NHS organisation</li> <li>- charity focusing on undertaking medical research</li> </ul>                                                                                                                                                                                                                                                                                                                                                                                                                                                                                                                                          |
| Formal bodies representing healthcare professionals or patients                                                                                | Local medical, optical, optometric, or pharmaceutical committees and statutory bodies representing healthcare professionals or patients | <ul style="list-style-type: none"> <li>- local medical committees (LMC)</li> <li>- local optical or optometric committee (LOC)</li> </ul> <p><i>England</i></p> <ul style="list-style-type: none"> <li>- local pharmaceutical committee (LPC)</li> </ul>                                                                                                                                                                                                                                                                                                                                                                                                                                                                |
| Charities and other third-sector organisations (excluding providers of health services, professional organisations, and patient organisations) | Organisations (not patient organisations) focusing on education, research, advocacy, and multipurpose organisations                     | <ul style="list-style-type: none"> <li>- charitable trusts providing medical education events to healthcare professionals</li> <li>- think tanks</li> <li>- third-sector organisation (non-charity) or charity focused on funding medical research</li> <li>- research institute registered as a charitable organisation</li> </ul>                                                                                                                                                                                                                                                                                                                                                                                     |
| Healthcare commissioning, planning and regulatory organisations                                                                                | Local, regional, and commissioning, planning, or regulatory organisations                                                               | <ul style="list-style-type: none"> <li>- primary care trust (PCT)</li> <li>- NHS Shared Business Services</li> <li>- National Institute for Health and Care Excellence (NICE)</li> <li>- Public Health England</li> </ul> <p><i>England</i></p> <ul style="list-style-type: none"> <li>- clinical commissioning group</li> <li>- Locality group</li> <li>- area prescribing committee</li> <li>- local commissioning group</li> <li>- NHS England</li> </ul> <p><i>Scotland</i></p> <ul style="list-style-type: none"> <li>- regional NHS board</li> <li>- area pharmaceutical committee</li> </ul> <p><i>Wales</i></p> <ul style="list-style-type: none"> <li>- health board</li> <li>- public health Wales</li> </ul> |

|                                                           |                                                                                                                                            |                                                                                                                                                                                                                                                                                                                                      |
|-----------------------------------------------------------|--------------------------------------------------------------------------------------------------------------------------------------------|--------------------------------------------------------------------------------------------------------------------------------------------------------------------------------------------------------------------------------------------------------------------------------------------------------------------------------------|
|                                                           |                                                                                                                                            | <i>Northern Ireland</i><br>- health and social care board<br>- local commissioning group                                                                                                                                                                                                                                             |
| Patient organisations                                     | Organisations focusing on supporting education, research, advocacy, and multipurpose organisations                                         | - multipurpose patient organisations<br>- organisations focused on providing patient support<br>- hospital charities                                                                                                                                                                                                                 |
| Private companies other than providers of health services | Providers of medical communications or training services, commercial or medical research services, and accountancy or consultancy services | - manufacturer or supplier of medical devices or technologies<br>- pharmacy wholesaler or distributor<br>- event management services<br>- journal or publishing company<br>- clinical or contract research organisation<br>- private laboratory                                                                                      |
| Private sector healthcare providers                       | Private clinics and hospitals, healthcare groups, and providers of dental, pharmacy, and optical services                                  | - dental practice<br>- pharmacy or chemist<br>- opticians<br>- private clinic, surgery, practice, or hospital<br>- private company providing community health or social care services                                                                                                                                                |
| Professional organisations                                | Organisations of medical professionals, other healthcare professionals, or non-healthcare professionals,                                   | - organisation of medical professionals<br>- professional bodies responsible for setting standards of care and education for medical specialities<br>- royal college - medical professionals<br>- alliance or coalition of professional associations or groups<br>- professional organisation of pharmacists or pharmacy technicians |
| Public administration and providers of public services    | Central UK government bodies, devolved administrations in Scotland, Wales, and Northern Ireland, and local authorities                     | - district, city, country, or borough council<br>- prison<br>- devolved administrations<br>- central government bodies                                                                                                                                                                                                               |
| Public sector primary care providers                      | General practitioner surgeries, medical practice centres, groups of surgeries or medical practices, and healthcare or medical groups       | - GP practice, surgery, medical practice or family practice<br>- health centre, medical centre or primary care centre<br>- group of surgeries or medical practices                                                                                                                                                                   |
| Public sector secondary and tertiary care providers       | NHS trusts, NHS hospitals, and networks and collaboratives of NHS organisations                                                            | - NHS hospital<br>- NHS Foundation Trust<br>- NHS trust<br>- strategic clinical network (SCN)<br><i>Scotland</i><br>- managed clinical network (MCN)                                                                                                                                                                                 |

Supplementary File 4. Top 10% of donors in each country

| Country          | Company (revenue ranking) | Payment value - £ (%) | Payments – n (%) |
|------------------|---------------------------|-----------------------|------------------|
| England          | Pfizer (2)                | 5,292,130.74 (10.09)  | 1636 (8.99)      |
|                  | Novartis (7)              | 3,564,500.43 (6.80)   | 460 (2.53)       |
|                  | Bayer (8)                 | 3,476,304.44 (6.63)   | 2110 (11.60)     |
|                  | GlaxoSmithKline (4)       | 3,291,496.35 (6.28)   | 1076 (5.92)      |
|                  | AstraZeneca (1)           | 2,779,000.54 (5.30)   | 1279 (7.03)      |
|                  | Janssen-Cilag (10)        | 2,387,242.64 (4.55)   | 722 (3.97)       |
|                  | UCB Pharma (30)           | 2,204,967.90 (4.20)   | 74 (0.41)        |
|                  | Astellas Pharma (21)      | 2,044,050.60 (3.90)   | 311 (1.71)       |
|                  | Roche (5)                 | 1,931,651.77 (3.68)   | 173 (0.95)       |
|                  | Biogen Idec (23)          | 1,886,879.26 (3.60)   | 83 (0.46)        |
|                  | Top 10% total             | 28,858,224.67 (55.03) | 7924 (43.56)     |
| Scotland         | Biogen Idec (24)          | 733,104.05 (20.09)    | 7 (0.51)         |
|                  | Takeda UK (38)            | 274,952.71 (7.53)     | 25 (1.82)        |
|                  | Pfizer (2)                | 250,859.45 (6.87)     | 143 (10.44)      |
|                  | Bayer (8)                 | 215,930.76 (5.92)     | 164 (11.97)      |
|                  | Novartis (7)              | 199,703.97 (5.47)     | 48 (3.50)        |
|                  | Bristol-Myers Squibb (23) | 183,959.00 (5.04)     | 51 (3.72)        |
|                  | AstraZeneca (1)           | 178,848.49 (4.90)     | 75 (5.47)        |
|                  | Top 10% total             | 2,037,358.42 (55.82)  | 513 (37.45)      |
| Wales            | Pfizer (2)                | 284,719.57 (14.32)    | 102 (10.30)      |
|                  | Roche (5)                 | 230,090.90 (11.58)    | 10 (1.01)        |
|                  | Novartis (7)              | 177,069.59 (8.91)     | 36 (3.64)        |
|                  | AstraZeneca (1)           | 148,288.67 (7.46)     | 79 (7.98)        |
|                  | Janssen-Cilag (10)        | 122,237.44 (6.15)     | 22 (2.22)        |
|                  | Biogen (24)               | 112,428.62 (5.66)     | 7 (0.71)         |
|                  | Top 10% total             | 1,074,834.80 (54.07)  | 256 (25.86)      |
| Northern Ireland | Sanofi Aventis (13)       | 92,252.80 (17.81)     | 24 (7.72)        |
|                  | Pfizer (2)                | 86,639.31 (16.73)     | 45 (14.47)       |
|                  | Napp Pharmaceuticals (29) | 83,252.29 (16.07)     | 45 (14.47)       |
|                  | Bayer (8)                 | 37,959.50 (7.33)      | 75 (24.12)       |
|                  | Top 10% total             | 300,103.90 (57.94)    | 189 (60.77)      |

\*Value as proportion of all payments in each country

Supplementary File 5. Visualised networks for England (a), Scotland (b), Wales (c), Northern Ireland (d)

Supplementary File 5a. England's network

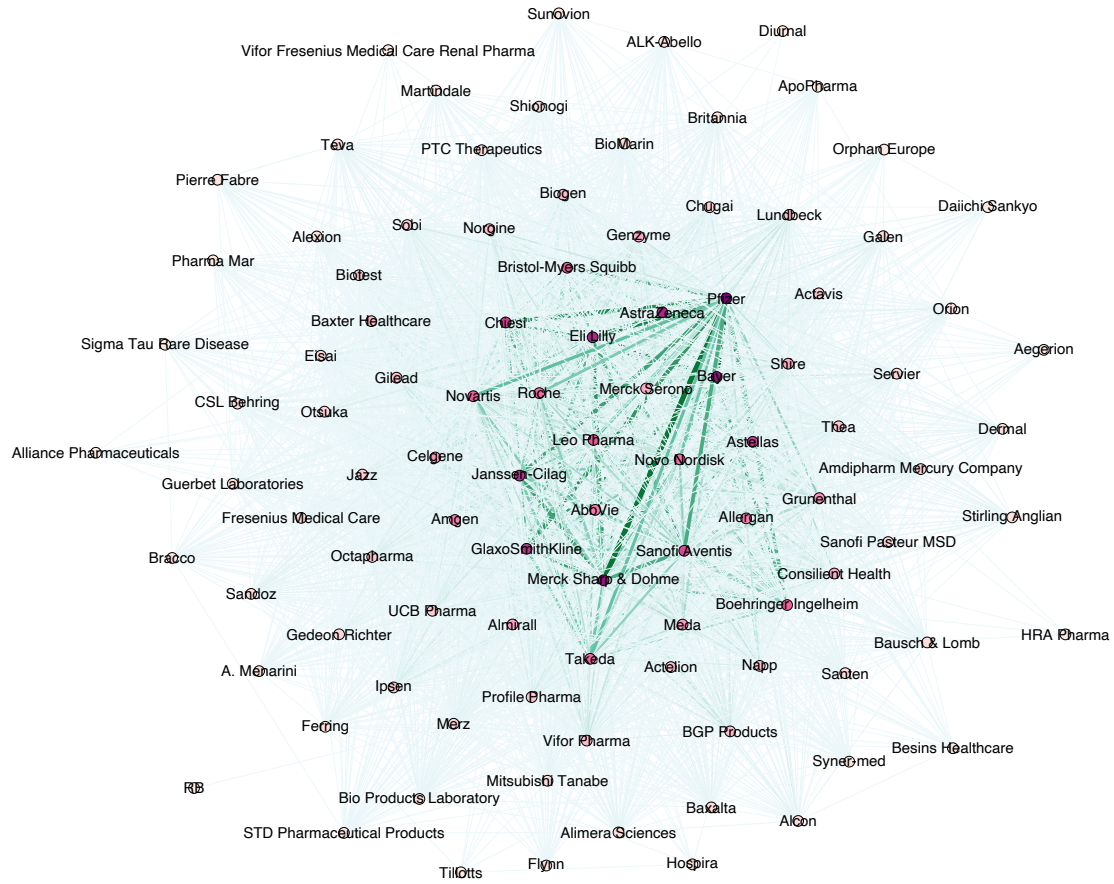

### Supplementary File 5b. Scotland's network

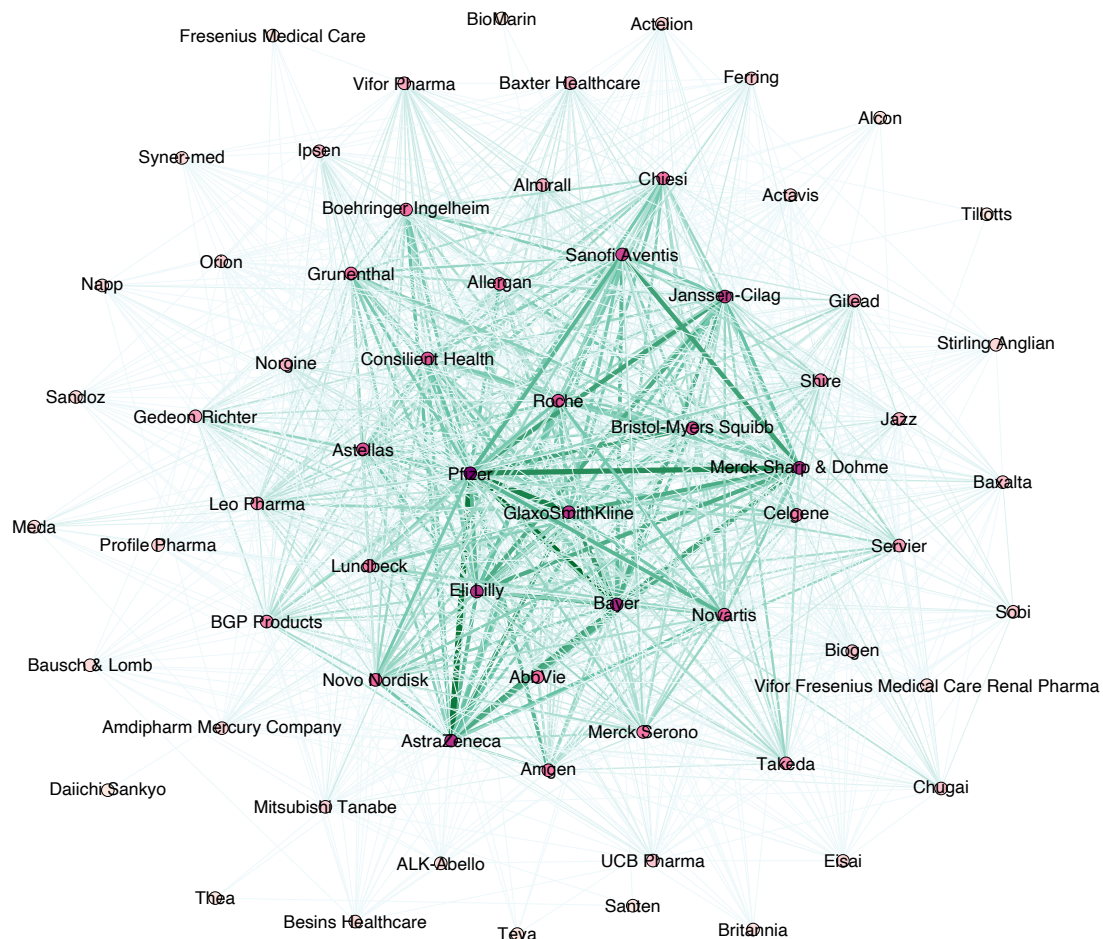



Supplementary File 5c. Wales' network

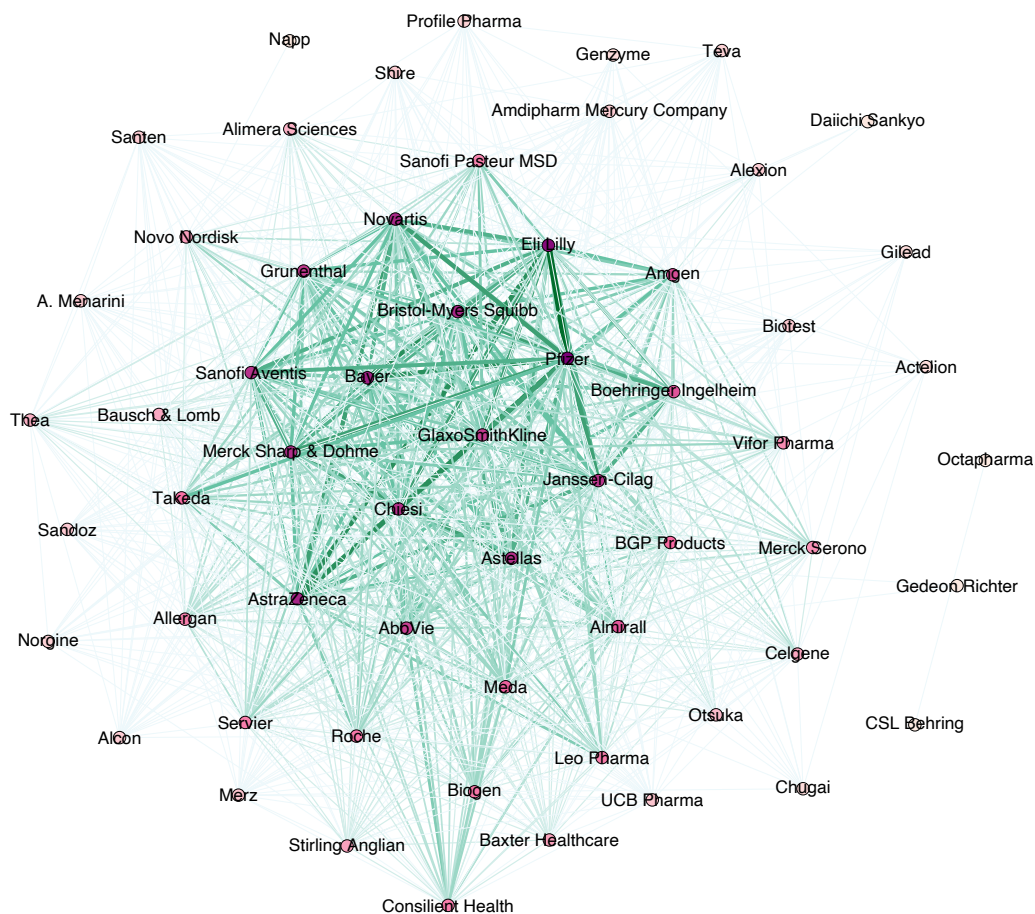

## Supplementary File 5d. Northern Ireland's network

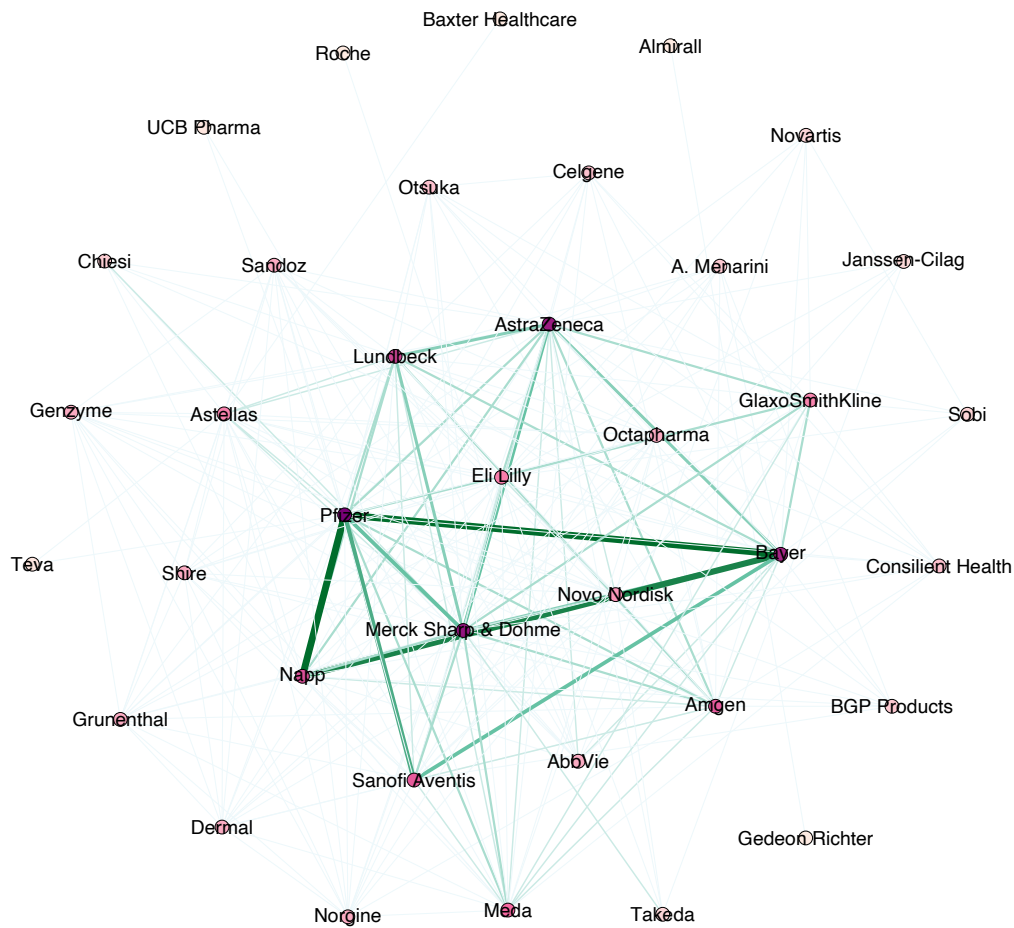

Note. All networks were visualised in Gephi v 0.9.2. Node label size and darkness corresponds to the weighted degree centrality of each company; the size and darkness of the edges (connecting lines) correspond to the number of shared recipients between companies

Supplementary File 6. Top ten companies by degree centrality scores in each country

| England                 |        | Scotland                  |        | Wales                     |        | Northern Ireland          |        |
|-------------------------|--------|---------------------------|--------|---------------------------|--------|---------------------------|--------|
| Company                 | Degree | Company                   | Degree | Company                   | Degree | Company                   | Degree |
| Pfizer (2)              | 3394   | Pfizer (2)                | 319    | Pfizer (2)                | 206    | Pfizer (2)                | 63     |
| Merck Sharp & Dohme (6) | 3064   | Bayer (8)                 | 260    | Eli Lilly (3)             | 196    | Merck Sharp & Dohme (6)   | 57     |
| Bayer (8)               | 3060   | Merck Sharp & Dohme (6)   | 251    | Bayer (8)                 | 176    | AstraZeneca (1)           | 55     |
| AstraZeneca (1)         | 2755   | AstraZeneca (1)           | 245    | AstraZeneca (1)           | 171    | Bayer (8)                 | 52     |
| Eli Lilly (3)           | 2741   | Eli Lilly (3)             | 245    | Bristol-Myers Squibb (23) | 169    | Lundbeck (64)             | 43     |
| Janssen-Cilag (10)      | 2539   | GlaxoSmithKline (4)       | 241    | Novartis (7)              | 168    | Napp Pharmaceuticals (29) | 39     |
| GlaxoSmithKline (4)     | 2531   | Janssen-Cilag (10)        | 227    | Merck Sharp & Dohme (6)   | 161    | Amgen (19)                | 36     |
| Astellas Pharma (21)    | 2410   | Sanofi Aventis (13)       | 214    | Astellas Pharma (21)      | 160    | Sanofi Aventis (13)       | 36     |
| Chiesi (27)             | 2365   | Astellas Pharma (21)      | 196    | Chiesi (27)               | 158    | Meda Pharma (46)          | 32     |
| Sanofi Aventis (13)     | 2156   | Bristol-Myers Squibb (23) | 193    | Sanofi Aventis (13)       | 156    | Eli Lilly (3)             | 27     |

Note. Numbers in brackets represent company size (revenue ranking)

## Supplementary File 7. Descriptive statistics for each recipient type

| England – types of recipient                                    | Value (%)                      | Payments – n (%)       | Median - £ (IQR)           | Recipients – n (%)     | Pharmaceutical companies     |
|-----------------------------------------------------------------|--------------------------------|------------------------|----------------------------|------------------------|------------------------------|
| Public sector secondary and tertiary care providers             | <b>13,349,779.1</b><br>(25.56) | <b>6660</b><br>(36.87) | 233.17 (141.87 – 500)      | 260 (7.41)             | <b>89</b>                    |
| Patient organisation                                            | 12,227,843.2<br>(23.41)        | 1141<br>(6.32)         | <b>4000 (500 – 11,104)</b> | 288 (8.21)             | 65                           |
| Education and research providers                                | 9,055,882.96<br>(17.34)        | 875<br>(4.84)          | 1000 (333.34 – 4,798.40)   | 56 (1.60)              | 68                           |
| Professional organisations                                      | 7,545,121.68<br>(14.44)        | 1776<br>(9.83)         | 500 (240 – 3,200)          | 354<br>(10.09)         | 84                           |
| Private companies other than providers of health services       | 3,975,461.63<br>(7.61)         | 1443<br>(7.99)         | 300 (196.8 – 598.92)       | 239 (6.81)             | 56                           |
| Public sector primary care providers                            | 2,416,957.98<br>(4.63)         | 2513<br>(13.91)        | 434.5 (193.6 – 869)        | <b>1809</b><br>(51.55) | 32                           |
| Private sector healthcare providers                             | 1,322,785.04<br>(2.53)         | 463<br>(2.56)          | 240 (166 – 588)            | 108 (3.08)             | 44                           |
| Healthcare commissioning, planning and regulatory organisations | 1,235,239.68<br>(2.36)         | 2166<br>(11.99)        | 208.17 (160 – 307.2)       | 206 (5.87)             | 47                           |
| Charities and other third-sector organisations                  | 876,822.76<br>(1.68)           | 366<br>(2.03)          | 223.52 (157 – 487.2)       | 39 (1.11)              | 40                           |
| Formal bodies representing healthcare professionals or patients | 121,351.93<br>(0.23)           | 458<br>(2.54)          | 200 (160 – 259.8)          | 68 (1.94)              | 25                           |
| Alternative providers of health services                        | 93,534.91<br>(0.18)            | 180<br>(1.00)          | 200 (160 – 394)            | 62 (1.77)              | 28                           |
| Public administration and providers of public services          | 15,335.25<br>(0.03)            | 24 (0.13)              | 394.4 (224.45 – 546.67)    | 20 (0.57)              | 10                           |
| <i>All payments</i>                                             | <i>52,445,615.48</i>           | <i>18065</i>           | <i>280 (160 – 827.75)</i>  | <i>3509</i>            | <i>100</i>                   |
| Scotland - types of recipient                                   | Value (%)                      | Payments – n (%)       | Median - £ (IQR)           | Recipients – n (%)     | Pharmaceutical companies (%) |
| Healthcare commissioning, planning and regulatory organisations | <b>878,333.57</b><br>(24.13)   | <b>582</b><br>(43.30)  | 240 (131.18 - 500)         | 22 (8.30)              | <b>53 (73.61)</b>            |
| Private companies other than providers of health services       | 740,694.09<br>(20.35)          | 25 (1.86)              | 1,200 (350 - 5,528.88)     | 11 (4.15)              | 13 (18.06)                   |
| Education and research providers                                | 708,149.16<br>(19.46)          | 141<br>(10.49)         | 1152 (400 – 2,880)         | 8 (3.02)               | 41 (56.94)                   |
| Patient organisation                                            | 620,384.33<br>(17.05)          | 52 (3.87)              | 1000 (253.68 - 9,745)      | 14 (5.28)              | 19 (26.39)                   |
| Professional organisations                                      | 466,833.11<br>(12.83)          | 291<br>(21.65)         | 450 (285.67 - 980)         | 64 (24.15)             | 52 (72.22)                   |

|                                                                 |                                     |                              |                             |                              |                                     |
|-----------------------------------------------------------------|-------------------------------------|------------------------------|-----------------------------|------------------------------|-------------------------------------|
| Public sector primary care providers                            | 112,308.91<br>(3.09)                | 128<br>(9.52)                | 434.5 (202.23 - 651,75)     | <b>113</b><br><b>(42.64)</b> | 13 (18.06)                          |
| Private sector healthcare providers                             | 58,091.76<br>(1.60)                 | 69 (5.13)                    | 647.54 (206.65- 1,500)      | 11 (4.15)                    | 9 (12.50)                           |
| Public sector secondary and tertiary care providers             | 27,392.82<br>(0.75)                 | 39 (2.90)                    | 300 (189.75 - 612)          | 12 (4.53)                    | 11 (15.28)                          |
| Charities and other third-sector organisations                  | 19,710 (0.54)                       | 4 (0.30)                     | <b>1700 (377.5 - 6,250)</b> | 2 (0.75)                     | 4 (5.56)                            |
| Alternative providers of health services                        | 4,580 (0.13)                        | 6 (0.45)                     | 700 (360 - 1,100)           | 4 (1.51)                     | 4 (5.56)                            |
| Public administration and providers of public services          | 2,700 (0.07)                        | 5 (0.37)                     | 540 (200 - 600)             | 3 (1.13)                     | 5 (6.94)                            |
| Formal bodies representing healthcare professionals or patients | 427.2 (0.01)                        | 2 (0.15)                     | 213.6 (211.4 - 214.8)       | 1 (0.38)                     | 1 (1.39)                            |
| <i>All payments</i>                                             | <i>3,649,749.43</i>                 | <i>1,344</i>                 | <i>400 (180 - 864)</i>      | <i>265</i>                   | <i>72</i>                           |
| <b>Wales - types of recipient</b>                               | <b>Value (%)</b>                    | <b>Payments - n (%)</b>      | <b>Median - £ (IQR)</b>     | <b>Recipients - n (%)</b>    | <b>Pharmaceutical companies (%)</b> |
| Healthcare commissioning, planning and regulatory organisations | <b>920,980.22</b><br><b>(46.38)</b> | <b>557</b><br><b>(56.61)</b> | 225 (114.24 - 486.39)       | 10 (4.72)                    | <b>50 (78.13)</b>                   |
| Private companies other than providers of health services       | 179,495.4<br>(9.04)                 | 56 (5.69)                    | <b>1475 (216 - 6,600)</b>   | 10 (4.72)                    | 8 (12.50)                           |
| Education and research providers                                | 179,256.38<br>(9.03)                | 37 (3.76)                    | 336 (175.2 - 1000)          | 5 (2.36)                     | 16 (25.00)                          |
| Public sector primary care providers                            | 173,268.30<br>(8.73)                | 141<br>(14.33)               | 800 (434.5 - 1,152)         | <b>118</b><br><b>(55.66)</b> | 15 (23.44)                          |
| Private sector healthcare providers                             | 153,983.36<br>(7.76)                | 18 (1.83)                    | 440 (360.94 - 1,732)        | 6 (2.83)                     | 9 (14.06)                           |
| Public administration and providers of public services          | 108,000<br>(5.44)                   | 1 (0.10)                     | -                           | 1 (0.47)                     | 1 (1.56)                            |
| Patient organisation                                            | 99,784.32<br>(5.03)                 | 22 (2.24)                    | 747.93 (500 - 2,000)        | 10 (4.72)                    | 11 (17.19)                          |
| Public sector secondary and tertiary care providers             | 96,862.66<br>(4.88)                 | 20 (2.03)                    | 253.66 (200 - 954)          | 3 (1.42)                     | 13 (20.31)                          |
| Professional organisations                                      | 64,181.82<br>(3.23)                 | 88 (8.94)                    | 400 (280 - 800)             | 38 (17.92)                   | 31 (48.44)                          |
| Charities and other third-sector organisations                  | 5,036.8 (0.25)                      | 17 (1.73)                    | 120 (120 - 180)             | 4 (1.89)                     | 7 (10.94)                           |
| Formal bodies representing healthcare professionals or patients | 4,679.37<br>(0.24)                  | 27 (2.74)                    | 120 (96 - 142)              | 7 (3.30)                     | 11 (17.19)                          |
| <i>All payments</i>                                             | <i>1,987,702.62</i>                 | <i>984</i>                   | <i>300 (144 - 800)</i>      | <i>212</i>                   | <i>64</i>                           |

| <b>Northern Ireland - types of recipient</b>                    | <b>Value (%)</b>          | <b>Payments - n (%)</b> | <b>Median - £ (IQR)</b>             | <b>Recipients - n (%)</b> | <b>Pharmaceutical companies (%)</b> |
|-----------------------------------------------------------------|---------------------------|-------------------------|-------------------------------------|---------------------------|-------------------------------------|
| Public sector primary care providers                            | <b>184,903.09 (35.72)</b> | <b>127 (40.97)</b>      | 600 (434.5 - 1,600)                 | <b>94 (60.65)</b>         | 6 (14.29)                           |
| Public sector secondary and tertiary care providers             | 111,743.45 (21.59)        | 83 (26.77)              | 288 (163.4 - 490.13)                | 5 (3.23)                  | <b>27 (64.29)</b>                   |
| Professional organisations                                      | 81,489.7 (15.74)          | 34 (10.97)              | 600 (320 - 1,784)                   | 21 (13.55)                | 21 (50.00)                          |
| Patient organisation                                            | 43,205.6 (8.35)           | 15 (4.84)               | 650 (600 - 1,450)                   | 7 (4.52)                  | 14 (33.33)                          |
| Education and research providers                                | 32,258 (6.23)             | 10 (3.23)               | 1100 (873.75 - 3525)                | 1 (0.65)                  | 7 (16.67)                           |
| Private companies other than providers of health services       | 26,242.77 (5.07)          | 6 (1.94)                | <b>4179.38 (1,152.19 - 7,687.5)</b> | 4 (2.58)                  | 3 (7.14)                            |
| Healthcare commissioning, planning and regulatory organisations | 22,447.6 (4.34)           | 7 (2.26)                | 1500 (470.8 - 4,087)                | 4 (2.58)                  | 6 (14.29)                           |
| Private sector healthcare providers                             | 11,476.85 (2.22)          | 23 (7.42)               | 38.49 (28.9 - 485)                  | 16 (10.32)                | 6 (14.29)                           |
| Formal bodies representing healthcare professionals or patients | 2,133.34 (0.41)           | 2 (0.65)                | 1066.67 (933.33 - 1200.00)          | 1 (0.65)                  | 1 (2.38)                            |
| Alternative providers of health services                        | 1,700 (0.33)              | 3 (0.97)                | 600 (550 - 600)                     | 2 (1.29)                  | 2 (4.76)                            |
| <i>All payments</i>                                             | <i>517,600.40</i>         | <i>310</i>              | <i>475.2 (217.25 - 1,357.47)</i>    | <i>155</i>                | <i>42</i>                           |

Supplementary File 8. Top 10 recipients in each country

| Country  | Recipient                          | Type of recipient                                               | Value - £    | Payments - n | Companies - n |
|----------|------------------------------------|-----------------------------------------------------------------|--------------|--------------|---------------|
| England  | King's College London              | Education and research providers                                | 2,572,086.51 | 45           | 18            |
|          | Bladder and Bowel Foundation       | Patient organisation                                            | 1,459,371.52 | 11           | 1             |
|          | London School Hyg and Tropical Med | Education and research providers                                | 935,025.98   | 16           | 6             |
|          | PeerVoice                          | Private companies other than providers of health services       | 930,028.30   | 11           | 3             |
|          | University College London          | Education and research providers                                | 907,256.40   | 96           | 36            |
|          | Diabetes UK - England              | Patient organisation                                            | 888,845.00   | 41           | 7             |
|          | Healthcare At Home                 | Private sector healthcare providers                             | 872,740.81   | 18           | 2             |
|          | Cancer Research UK                 | Patient organisation                                            | 804,543.76   | 19           | 9             |
|          | Central Manchester Univ Hosps FT   | Public sector secondary and tertiary care providers             | 739,595.97   | 108          | 37            |
|          | British Society for Rheumatology   | Professional organisations                                      | 543,012.33   | 31           | 14            |
| Scotland | Quintiles - Scotland               | Private companies other than providers of health services       | 682,601.65   | 5            | 1             |
|          | Myeloma UK                         | Patient organisation                                            | 521,574.36   | 12           | 7             |
|          | NHS Greater Glasgow and Clyde      | Healthcare commissioning, planning and regulatory organisations | 483,354.99   | 153          | 34            |
|          | University of Glasgow              | Education and research providers                                | 442,707.63   | 70           | 26            |
|          | University of Dundee               | Education and research providers                                | 160,632.40   | 20           | 11            |
|          | NHS Lothian                        | Healthcare commissioning, planning and regulatory organisations | 144,175.05   | 73           | 25            |
|          | University of Edinburgh            | Education and research providers                                | 73,014.39    | 37           | 21            |
|          | NHS Tayside                        | Healthcare commissioning, planning and regulatory organisations | 67,924.08    | 74           | 24            |
|          | NHS Ayrshire and Arran             | Healthcare commissioning, planning and regulatory organisations | 63,276.93    | 48           | 25            |
|          | Digestive Disorders Federation     | Professional organisations                                      | 60,796.00    | 2            | 2             |
| Wales    | Cardiff and Vale University HB     | Healthcare commissioning, planning and regulatory organisations | 344,131.95   | 89           | 28            |

|                  |                                                                               |                                                                 |            |     |    |
|------------------|-------------------------------------------------------------------------------|-----------------------------------------------------------------|------------|-----|----|
|                  | Abertawe Bro Morgannwg Univ HB                                                | Healthcare commissioning, planning and regulatory organisations | 242,418.82 | 124 | 32 |
|                  | LloydsPharmacy                                                                | Private sector healthcare providers                             | 146,376.00 | 4   | 1  |
|                  | University of Cardiff                                                         | Education and research providers                                | 120,822.78 | 27  | 13 |
|                  | Bluebay Medical Systems                                                       | Private companies other than providers of health services       | 116,900.00 | 26  | 1  |
|                  | Hywel Dda University HB                                                       | Healthcare commissioning, planning and regulatory organisations | 115,600.62 | 77  | 27 |
|                  | National Assembly for Wales                                                   | Public administration and providers of public services          | 108,000.00 | 1   | 1  |
|                  | Betsi Cadwaladr University HB                                                 | Healthcare commissioning, planning and regulatory organisations | 101,352.58 | 76  | 21 |
|                  | Cwm Taf University Health Board                                               | Healthcare commissioning, planning and regulatory organisations | 84,624.15  | 119 | 25 |
|                  | Velindre NHS Trust                                                            | Public sector secondary and tertiary care providers             | 80,629.32  | 18  | 13 |
| Northern Ireland | Belfast Health and SC Trust                                                   | Public sector secondary and tertiary care providers             | 60,615.65  | 30  | 17 |
|                  | Federation Of Family Practices                                                | Public sector primary care providers                            | 40,235.20  | 3   | 3  |
|                  | UK and Ireland Society of Cataract and Refractive Surgeons - Northern Ireland | Professional organisations                                      | 35,000.00  | 1   | 1  |
|                  | Queen's University Belfast                                                    | Education and research providers                                | 32,258.00  | 10  | 7  |
|                  | Northern Health and SC Trust                                                  | Public sector secondary and tertiary care providers             | 23,703.46  | 14  | 8  |
|                  | Medical Communications                                                        | Private companies other than providers of health services       | 23,250.00  | 3   | 1  |
|                  | Adult ADHD - Northern Ireland                                                 | Patient organisation                                            | 20,000.00  | 1   | 1  |
|                  | Ulster Chemists' Association                                                  | Professional organisations                                      | 16,584.00  | 4   | 3  |
|                  | Western Health and SC Trust                                                   | Public sector secondary and tertiary care providers             | 15,068.55  | 12  | 10 |
|                  | Cancer Focus Northern Ireland                                                 | Patient organisation                                            | 12,255.60  | 2   | 2  |



## Supplementary File 9. Post-hoc Bonferroni pairwise comparisons between countries of payments per recipient type

| Recipient type                                      | Group 1 – Group 2*        | Test Statistic | Std. Error | Std. Test Statistic | Sig.  | Adj. Sig <sup>†,‡</sup> | Median (IQR) – group 1 - £ | Median (IQR) – group 2 - £  |
|-----------------------------------------------------|---------------------------|----------------|------------|---------------------|-------|-------------------------|----------------------------|-----------------------------|
| Alternative providers of health services            | England-Scotland          | -59.003        | 22.681     | -2.601              | 0.009 | <b>0.028</b>            | 200 (160 – 394)            | 700 (360 – 1,100)           |
|                                                     | England-Northern Ireland  | -65.919        | 31.816     | -2.072              | 0.038 | 0.115                   | 200 (160 – 394)            | 600 (550 - 600)             |
|                                                     | Scotland-Northern Ireland | 6.917          | 38.645     | 0.179               | 0.858 | 1                       | 700 (360 – 1,100)          | 600 (550 - 600)             |
| Charities and other third-sector organisations      | England-Scotland          | -118.214       | 56.132     | -2.106              | 0.035 | 0.106                   | 223.52 (157 – 487.2)       | <b>1700 (377.5 - 6,250)</b> |
|                                                     | Wales-England             | 79.844         | 27.702     | 2.882               | 0.004 | <b>0.012</b>            | 120 (120 - 180)            | 223.52 (157 – 487.2)        |
|                                                     | Wales-Scotland            | 198.059        | 62.049     | 3.192               | 0.001 | <b>0.004</b>            | 120 (120 - 180)            | <b>1700 (377.5 - 6,250)</b> |
| Education and research providers                    | England-Scotland          | -5.623         | 27.857     | -0.202              | 0.84  | 1                       | 1000 (333.34 – 4,798.40)   | 1152 (400 – 2,880)          |
|                                                     | England-Northern Ireland  | -92.61         | 97.628     | -0.949              | 0.343 | 1                       | 1000 (333.34 – 4,798.40)   | 1100 (873.75 - 3525)        |
|                                                     | Scotland-Northern Ireland | 86.987         | 100.458    | 0.866               | 0.387 | 1                       | 1152 (400 – 2,880)         | 1100 (873.75 - 3525)        |
|                                                     | Wales-England             | 204.193        | 51.523     | 3.963               | <.001 | <b>0</b>                | 336 (175.2 - 1000)         | 1000 (333.34 – 4,798.40)    |
|                                                     | Wales-Scotland            | 209.816        | 56.703     | 3.7                 | <.001 | <b>0.001</b>            | 336 (175.2 - 1000)         | 1152 (400 – 2,880)          |
|                                                     | Wales-Northern Ireland    | 296.803        | 109.409    | 2.713               | 0.007 | <b>0.04</b>             | 336 (175.2 - 1000)         | 1100 (873.75 - 3525)        |
| Formal bodies representing healthcare professionals | England-Scotland          | -46.978        | 99.854     | -0.47               | 0.638 | 1                       | 200 (160 – 259.8)          | 213.6 (211.4 - 214.8)       |
|                                                     | England-Northern Ireland  | -223.228       | 99.854     | -2.236              | 0.025 | 0.152                   | 200 (160 – 259.8)          | 1066.67 (933.33 - 1200.00)  |
|                                                     | Scotland-Northern Ireland | 176.25         | 140.907    | 1.251               | 0.211 | 1                       | 213.6 (211.4 - 214.8)      | 1066.67 (933.33 - 1200.00)  |
|                                                     | Wales-England             | 138.133        | 27.905     | 4.95                | <.001 | <b>0</b>                | 120 (96 - 142)             | 200 (160 – 259.8)           |
|                                                     | Wales-Scotland            | 185.111        | 103.261    | 1.793               | 0.073 | 0.438                   | 120 (96 - 142)             | 213.6 (211.4 - 214.8)       |

|                                                                 |                           |          |         |        |       |              |                           |                                     |
|-----------------------------------------------------------------|---------------------------|----------|---------|--------|-------|--------------|---------------------------|-------------------------------------|
|                                                                 | Wales-Northern Ireland    | 361.361  | 103.261 | 3.5    | <.001 | <b>0.003</b> | 120 (96 - 142)            | 1066.67 (933.33 - 1200.00)          |
| Healthcare commissioning, planning and regulatory organisations | England-Scotland          | -122.159 | 44.623  | -2.738 | 0.006 | <b>0.037</b> | 208.17 (160 - 307.2)      | 240 (131.18 - 500)                  |
|                                                                 | England-Northern Ireland  | -786.684 | 361.817 | -2.174 | 0.03  | 0.178        | 208.17 (160 - 307.2)      | 1500 (470.8 - 4,087)                |
|                                                                 | Scotland-Northern Ireland | 664.525  | 363.4   | 1.829  | 0.067 | 0.405        | 240 (131.18 - 500)        | 1500 (470.8 - 4,087)                |
|                                                                 | Wales-Scotland            | 94.65    | 56.651  | 1.671  | 0.095 | 0.569        | 225 (114.24 - 486.39)     | 240 (131.18 - 500)                  |
|                                                                 | Wales-Northern Ireland    | 759.175  | 363.497 | 2.089  | 0.037 | 0.22         | 225 (114.24 - 486.39)     | 1500 (470.8 - 4,087)                |
|                                                                 | England-Wales             | -27.51   | 45.405  | -0.606 | 0.545 | 1            | 208.17 (160 - 307.2)      | 225 (114.24 - 486.39)               |
| Patient organisation                                            | Wales-England             | 144.727  | 77.321  | 1.872  | 0.061 | 0.367        | 747.93 (500 - 2,000)      | <b>4000 (500 - 11,104)</b>          |
|                                                                 | Wales-Scotland            | 29.422   | 91.028  | 0.323  | 0.747 | 1            | 747.93 (500 - 2,000)      | 1000 (253.68 - 9,745)               |
|                                                                 | Northern Ireland-Wales    | -8.633   | 118.686 | -0.073 | 0.942 | 1            | 650 (600 - 1,450)         | 747.93 (500 - 2,000)                |
|                                                                 | Northern Ireland-Scotland | -38.055  | 103.121 | -0.369 | 0.712 | 1            | 650 (600 - 1,450)         | 1000 (253.68 - 9,745)               |
|                                                                 | Northern Ireland-England  | 153.361  | 91.248  | 1.681  | 0.093 | 0.557        | 650 (600 - 1,450)         | <b>4000 (500 - 11,104)</b>          |
|                                                                 | Scotland-England          | 115.306  | 50.259  | 2.294  | 0.022 | 0.131        | 1000 (253.68 - 9,745)     | <b>4000 (500 - 11,104)</b>          |
| Private companies other than providers of health services       | England-Scotland          | -317.041 | 89.112  | -3.558 | <.001 | <b>0.002</b> | 300 (196.8 - 598.92)      | 1,200 (350 - 5,528.88)              |
|                                                                 | England-Northern Ireland  | -527.308 | 180.717 | -2.918 | 0.004 | <b>0.021</b> | 300 (196.8 - 598.92)      | <b>4179.38 (1,152.19 - 7,687.5)</b> |
|                                                                 | Scotland-Northern Ireland | 210.267  | 200.821 | 1.047  | 0.295 | 1            | 1,200 (350 - 5,528.88)    | <b>4179.38 (1,152.19 - 7,687.5)</b> |
|                                                                 | Wales-Scotland            | 115.061  | 106.256 | 1.083  | 0.279 | 1            | <b>1475 (216 - 6,600)</b> | 1,200 (350 - 5,528.88)              |
|                                                                 | Wales-Northern Ireland    | 325.327  | 189.758 | 1.714  | 0.086 | 0.519        | <b>1475 (216 - 6,600)</b> | <b>4179.38 (1,152.19 - 7,687.5)</b> |

|                                      |                           |          |         |        |       |              |                         |                           |
|--------------------------------------|---------------------------|----------|---------|--------|-------|--------------|-------------------------|---------------------------|
|                                      | England-Wales             | -201.98  | 60.166  | -3.357 | <.001 | <b>0.005</b> | 300 (196.8 – 598.92)    | <b>1475 (216 – 6,600)</b> |
| Private sector healthcare providers  | England-Scotland          | -64.982  | 21.355  | -3.043 | 0.002 | <b>0.014</b> | 240 (166 – 588)         | 647.54 (206.65 – 1,500)   |
|                                      | England-Wales             | -88.107  | 39.755  | -2.216 | 0.027 | 0.16         | 240 (166 – 588)         | 440 (360.94 – 1,732)      |
|                                      | Northern Ireland-Wales    | -206.778 | 52.076  | -3.971 | <.001 | <b>0</b>     | 38.49 (28.9 – 485)      | 440 (360.94 – 1,732)      |
|                                      | Northern Ireland-Scotland | -183.652 | 39.843  | -4.609 | <.001 | <b>0</b>     | 38.49 (28.9 – 485)      | 647.54 (206.65 – 1,500)   |
|                                      | Northern Ireland-England  | 118.671  | 35.352  | 3.357  | <.001 | <b>0.005</b> | 38.49 (28.9 – 485)      | 240 (166 – 588)           |
|                                      | Scotland-wales            | -23.126  | 43.797  | -0.528 | 0.597 | 1            | 647.54 (206.65 – 1,500) | 440 (360.94 – 1,732)      |
| Professional organisations           | England-Northern Ireland  | -35.169  | 109.4   | -0.321 | 0.748 | 1            | 500 (240 – 3,200)       | 600 (320 – 1,784)         |
|                                      | Scotland-Northern Ireland | 157.615  | 114.524 | 1.376  | 0.169 | 1            | 450 (285.67 – 980)      | 600 (320 – 1,784)         |
|                                      | Wales-England             | 182.447  | 69.008  | 2.644  | 0.008 | <b>0.049</b> | 400 (280 – 800)         | 500 (240 – 3,200)         |
|                                      | Wales-Scotland            | 60.001   | 76.873  | 0.781  | 0.435 | 1            | 400 (280 – 800)         | 450 (285.67 – 980)        |
|                                      | Wales-Northern Ireland    | 217.616  | 127.597 | 1.705  | 0.088 | 0.529        | 400 (280 – 800)         | 600 (320 – 1,784)         |
|                                      | Scotland-England          | 122.446  | 39.962  | 3.064  | 0.002 | <b>0.013</b> | 450 (285.67 – 980)      | 500 (240 – 3,200)         |
| Public sector primary care providers | England-Northern Ireland  | -355.779 | 76.292  | -4.663 | <.001 | <b>0</b>     | 434.5 (193.6 – 869)     | 600 (434.5 – 1,600)       |
|                                      | Scotland-Northern Ireland | 407.76   | 105.06  | 3.881  | <.001 | <b>0.001</b> | 434.5 (202.23 – 651,75) | 600 (434.5 – 1,600)       |
|                                      | England-Wales             | -459.79  | 72.597  | -6.333 | <.001 | <b>0</b>     | 434.5 (193.6 – 869)     | 800 (434.5 – 1,152)       |
|                                      | Northern Ireland-Wales    | -104.011 | 102.62  | -1.014 | 0.311 | 1            | 600 (434.5 – 1,600)     | 800 (434.5 – 1,152)       |
|                                      | Scotland-England          | 51.98    | 76.008  | 0.684  | 0.494 | 1            | 434.5 (202.23 – 651,75) | 434.5 (193.6 – 869)       |
|                                      | Scotland-wales            | -511.771 | 102.409 | -4.997 | <.001 | <b>0</b>     | 434.5 (202.23 – 651,75) | 800 (434.5 – 1,152)       |

\*Each row tests the null hypothesis that the Sample 1 and Sample 2 distributions are the same.

†Asymptotic significances (2-sided tests) are displayed. The significance level is .050.

‡Significance values have been adjusted by the Bonferroni correction for multiple tests

## Supplementary File 10. Post-hoc Bonferroni pairwise comparisons of payment types between countries

| Payment Type*                   | Group 1 – Group 2** | Test Statistic | Std. Error | Std. Test Statistic | Sig.  | Adj. Sig†,‡ | Median (IQR) – group 1 - £ | Median (IQR) – group 2 - £ |
|---------------------------------|---------------------|----------------|------------|---------------------|-------|-------------|----------------------------|----------------------------|
| Contribution to costs of Events | Wales-England       | 498.254        | 159.743    | 3.119               | 0.002 | 0.011       | 223.36 (120 - 400)         | 240 (155.95 - 400)         |
|                                 | Wales-Scotland      | 1449.82        | 208.45     | 6.955               | <.001 | 0           | 223.36 (120 - 400)         | 300 (160 - 600)            |
|                                 | Wales-Northern      | 2690.485       | 402.839    | 6.679               | <.001 | 0           | 223.36 (120 - 400)         | 477.6 (200 - 1,147.6)      |
|                                 | England-Scotland    | -951.566       | 143.605    | -6.626              | <.001 | 0           | 240 (155.95 - 400)         | 300 (160 - 600)            |
|                                 | England-Northern    | -2192.23       | 373.43     | -5.871              | <.001 | 0           | 240 (155.95 - 400)         | 477.6 (200 - 1,147.6)      |
|                                 | Scotland-Northern   | 1240.664       | 396.716    | 3.127               | 0.002 | 0.011       | 300 (160 - 600)            | 477.6 (200 - 1,147.6)      |
| Donations and Grants            | Wales-England       | 25.151         | 94.77      | 0.265               | 0.791 | 1           | 800 (434.5 - 2,200)        | 959.98 (256 - 4,800)       |
|                                 | Northern-Scotland   | -140.935       | 137.745    | -1.023              | 0.306 | 1           | 434.5 (217.5 - 1,867.5)    | 651.75 (217.25 - 2,578)    |
|                                 | Northern-Wales      | -451.347       | 142.863    | -3.159              | 0.002 | 0.009       | 434.5 (217.5 - 1,867.5)    | 800 (434.5 - 2,200)        |
|                                 | Northern-England    | 476.498        | 111.315    | 4.281               | <.001 | 0           | 434.5 (217.5 - 1,867.5)    | 959.98 (256 - 4,800)       |
|                                 | Scotland-Wales      | -310.412       | 124.755    | -2.488              | 0.013 | 0.077       | 651.75 (217.25 - 2,578)    | 800 (434.5 - 2,200)        |
|                                 | Scotland-England    | 335.563        | 86.862     | 3.863               | <.001 | 0.001       | 651.75 (217.25 - 2,578)    | 959.98 (256 - 4,800)       |

\*Kruskal-Wallis results: Contributions to cost of events  $\chi^2(3) = 89.680$ ,  $p = .000$ ; Donations and grants  $\chi^2(3) = 31.698$ ,  $p = <.000$

\*\*Each row tests the null hypothesis that the Sample 1 and Sample 2 distributions are the same.

†Asymptotic significances (2-sided tests) are displayed. The significance level is .050.

‡Significance values have been adjusted by the Bonferroni correction for multiple tests.
